# Supplementary material for: Decade of research into the acceptability of interventions aimed at improving adolescent and youth health and social outcomes in Africa: a systematic review and evidence map
Source: PubMed Central journal article supplement — BMJ Open. 2021 Dec 20;11(12):e055160. doi: 10.1136/bmjopen-2021-055160 (PMC8689197; doi:10.1136/bmjopen-2021-055160), 2021-12-20
Supplement: bmjopen-2021-055160.draft_revisions.pdf [file bmjopen-2021-055160.draft_revisions.pdf]

# BMJ Open

BMJ Open is committed to open peer review. As part of this commitment we make the peer review history of every article we publish publicly available.

When an article is published we post the peer reviewers' comments and the authors' responses online. We also post the versions of the paper that were used during peer review. These are the versions that the peer review comments apply to.

The versions of the paper that follow are the versions that were submitted during the peer review process. They are not the versions of record or the final published versions. They should not be cited or distributed as the published version of this manuscript.

BMJ Open is an open access journal and the full, final, typeset and author-corrected version of record of the manuscript is available on our site with no access controls, subscription charges or pay-per-view fees (<http://bmjopen.bmj.com>).

If you have any questions on BMJ Open's open peer review process please email [info.bmjopen@bmj.com](mailto:info.bmjopen@bmj.com)

# BMJ Open

## A decade of Acceptability Research with Adolescents in Africa: Systematic review and evidence map

|                               |                                                                                                                                                                                                                                                                                                                                                                                                                             |
|-------------------------------|-----------------------------------------------------------------------------------------------------------------------------------------------------------------------------------------------------------------------------------------------------------------------------------------------------------------------------------------------------------------------------------------------------------------------------|
| Journal:                      | <i>BMJ Open</i>                                                                                                                                                                                                                                                                                                                                                                                                             |
| Manuscript ID                 | bmjopen-2021-055160                                                                                                                                                                                                                                                                                                                                                                                                         |
| Article Type:                 | Original research                                                                                                                                                                                                                                                                                                                                                                                                           |
| Date Submitted by the Author: | 05-Jul-2021                                                                                                                                                                                                                                                                                                                                                                                                                 |
| Complete List of Authors:     | Somefun, Oluwaseyi; University of the Western Cape, School of Public Health<br>Casale, Marisa; University of the Western Cape, School of Public Health<br>Hauptronnie, Genevieve; University of Cape Town<br>Desmond, Chris; University of KwaZulu-Natal<br>Cluver, Lucie; University of Oxford, Department of Social Policy and Social Work<br>Sherr, Lorraine; University College London., Clinical and Health Psychology |
| Keywords:                     | PUBLIC HEALTH, Demography < TROPICAL MEDICINE, Infectious disease/HIV < NEUROLOGY                                                                                                                                                                                                                                                                                                                                           |
|                               |                                                                                                                                                                                                                                                                                                                                                                                                                             |

SCHOLARONE™  
Manuscripts

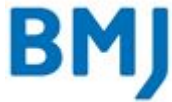

I, the Submitting Author has the right to grant and does grant on behalf of all authors of the Work (as defined in the below author licence), an exclusive licence and/or a non-exclusive licence for contributions from authors who are: i) UK Crown employees; ii) where BMJ has agreed a CC-BY licence shall apply, and/or iii) in accordance with the terms applicable for US Federal Government officers or employees acting as part of their official duties; on a worldwide, perpetual, irrevocable, royalty-free basis to BMJ Publishing Group Ltd ("BMJ") its licensees and where the relevant Journal is co-owned by BMJ to the co-owners of the Journal, to publish the Work in this journal and any other BMJ products and to exploit all rights, as set out in our [licence](#).

The Submitting Author accepts and understands that any supply made under these terms is made by BMJ to the Submitting Author unless you are acting as an employee on behalf of your employer or a postgraduate student of an affiliated institution which is paying any applicable article publishing charge ("APC") for Open Access articles. Where the Submitting Author wishes to make the Work available on an Open Access basis (and intends to pay the relevant APC), the terms of reuse of such Open Access shall be governed by a Creative Commons licence – details of these licences and which [Creative Commons](#) licence will apply to this Work are set out in our licence referred to above.

Other than as permitted in any relevant BMJ Author's Self Archiving Policies, I confirm this Work has not been accepted for publication elsewhere, is not being considered for publication elsewhere and does not duplicate material already published. I confirm all authors consent to publication of this Work and authorise the granting of this licence.

## A decade of Acceptability Research with Adolescents in Africa: Systematic review and evidence map

Oluwaseyi Somefun<sup>1</sup>, Marisa Casale<sup>1,2</sup>, Genevieve Haupt Ronnie<sup>3</sup>, Chris Desmond<sup>4</sup>, Lucie Cluver<sup>2,5</sup>, Lorraine Sherr<sup>6</sup>

<sup>1</sup>UKRI GCRF Accelerating Achievement for Africa's Adolescents, School of Public Health, University of the Western Cape, Cape Town, South Africa

<sup>2</sup>Department of Social Policy and Intervention, University of Oxford, Barnett House, Oxford, United Kingdom

<sup>3</sup>Centre for Social Science Research, University of Cape Town

<sup>4</sup>Centre for Rural Health, University of KwaZulu-Natal

<sup>5</sup> Dept of Psychiatry and Mental Health, University of Cape Town

<sup>6</sup>University College London: London, England, GB

Correspondence: [seyi.somefun@gmail.com](mailto:seyi.somefun@gmail.com)

## Abstract

Interventions aimed at improving adolescent developmental outcomes are more likely to be successful if the young people they target find them acceptable. However, no standard definitions or indicators exist to assess acceptability, acceptability research with adolescents in LMICs is still limited, and no known reviews synthesise the evidence from Africa.

We conducted a systematic review of peer-reviewed studies assessing intervention acceptability with young adults (aged 10-24) in Africa, published between January 2010 and June 2020. This paper maps and qualitatively synthesizes the scope, characteristics, and findings of these studies, including definitions of acceptability, methods used, the type and objectives of interventions assessed, and overall findings on adolescent acceptability.

The review was carried out in line with the Preferred Reporting Items for Systematic Reviews and Meta-Analyses (PRISMA). Key word searches generated 4692 unique records and 55 final eligible studies, assessing 60 interventions. Most studies were conducted in Southern Africa, of which 32 jointly in South Africa and Uganda. The majority of interventions assessed for acceptability could be classified as HIV or HPV vaccine interventions (10), E-health (10), HIV testing interventions (8), support group interventions (7) and contraceptive interventions (6). The objectives of most interventions were linked to SDG3, specifically to HIV and sexual and reproductive health. Acceptability was overall high among these published studies. 22 studies provided reasons for acceptability or lack thereof, some specific to particular types of interventions and others common across intervention types.

Our review exposes considerable scope for future acceptability research and review work. This should include: extending acceptability research beyond the health (and particularly HIV) sector and to regions in Africa where this type of research is still scarce; including adolescents earlier, and potentially throughout the intervention process; further conceptualising the construct of acceptability among adolescents and beyond, and examining the relationship between acceptability and uptake.

**Key words: acceptability; adolescents; youth; interventions; Africa**

### Strengths and limitations of this study

- This is the first review to aggregate and synthesise a decade of acceptability studies with adolescents in Africa, we believe this study makes a valuable contribution to the African and global literature on acceptability.
- This review highlights the overall high level of acceptability of the interventions assessed, and some of the reasons why adolescents and young adults may or may not find interventions acceptable– both specific to particular types of interventions and common across intervention types.
- There was a geographical coverage in our review, particularly in West, Central and North Africa. This could be as a result of confining our search to English language publications which may have excluded some studies from African countries where French is the first language.

## Key Questions

### What is already known?

- Addressing the developmental needs of adolescents in African countries is critical if the continent is to achieve its sustainable development goals (SDGs).
- Many interventions aimed at strengthening adolescent developmental outcomes have not achieved desired impact, and adolescent involvement is often poorly envisaged and implemented.
- Uptake and effectiveness of interventions is likely to be higher if these interventions are acceptable to adolescent end-users.

### What are the new findings?

- Acceptability of interventions assessed in Africa was generally high among adolescents.
- Understanding of the intervention, ease of use, adequate emotional support, autonomy, confidentiality and protection from stigma were key overarching themes explaining why young people found interventions acceptable

### What do the new findings imply?

- Intervention developers and implementers across the continent should pay attention to these key aspects of interventions and their delivery.
- It is important to strengthen adolescents' understanding of interventions, involve adolescents early on in intervention development, and engage with the broader context within which adolescent acceptability is shaped.
- There is a need for more acceptability research in important areas for adolescent development beyond (physical) health and, within the health sector, beyond HIV.

## Background

Addressing the developmental needs of adolescents in African countries is critical if the continent is to achieve its sustainable development goals (SDGs), and envisaged transformation articulated in the African Union's overarching Agenda 2063 (1, 2). Adolescents make up the largest generation of their age group in history (3), and Sub-Saharan Africa (SSA) accounts for over 20% of the estimated 1.8 billion adolescents and young adults globally (4). Investing in adolescent wellbeing can have positive effects for individuals during adolescence and beyond, as well as potential positive societal effects. Interventions that reduce the consequences of poverty among adolescents, or lead to more positive behaviours, can influence development and wellbeing during adolescence and throughout the life course (5-7). Investment during adolescence can strengthen early childhood investments and reduce the burden of morbidity and mortality in adulthood (8). Moreover, it has been argued that investment in adolescents can help realize the 'demographic dividend' (9, 10), and reduce generational inequalities (11).

Substantial investment has been made globally in adolescent interventions focusing on areas such as sexual and reproductive health, nutrition, uptake of vaccines and prevention of substance abuse (12). Unfortunately these interventions have not always recorded impressive impact (13). Data from both high-income countries (HICs) and low- and middle-income countries (LMICs) reveal that many interventions focusing on adolescents are fragmented, poorly designed, and unequal in quality (14). One reason for this may be an insufficient understanding of the particular nature of adolescence (15).

Adolescence is a critical period characterised by rapid development of the physical, cognitive, social, and emotional capabilities that are instrumental across their life-course (3). Adolescence is also a time of gathering independence and the pathways to learning and experiencing such independence are varied, with experiential learning playing a key role. The rapid growth associated with this phase and its influences on behaviour need to be well understood in order to design timely and effective interventions (16).

Interventions may also fail to sufficiently consider the diverse environments in which adolescents live, that may shape their decisions and behaviour (17). This may lead to interveners missing important factors that, if unaddressed, will prevent the intervention from having the desired impact. Additionally, program implementers may lack the specialized skills necessary for delivering and sustaining these interventions (12). Adult interventions may not translate directly for adolescent audiences and programme adjustments may be inadequate.

Since most interventions seek to effect adolescent behavioural change, many of the obstacles to uptake and effectiveness could be addressed by affording sufficient importance to the perspectives and participation of adolescents themselves. When adolescents feel coerced to engage in a particular behaviour or accept interventions that they don't identify with, they are more likely to resist the message of the proposed intervention, or to stop participating altogether (18). Instead, interventions that are



1  
2  
3 acceptable to adolescent end-users are likely to have higher social validity (19), uptake  
4 and effectiveness (20, 21).  
5

6  
7 However, adolescent involvement and input in intervention design has been varied, and  
8 models of adolescent inclusion have been poorly envisaged and implemented. There is  
9 still a relatively low number of acceptability studies among adolescents in LMICs and  
10 specifically in Africa, particularly beyond the health sector (19, 20). To our knowledge no  
11 existing reviews comprehensively map the extant body of acceptability research in Africa  
12 and aggregate the evidence emerging from these studies. Furthermore, there is no clear  
13 and standard definition of acceptability (20) in Africa and beyond. This in turn raises  
14 several methodological challenges when setting out to assess acceptability, including the  
15 choice of measurement frameworks and tools (20). It also highlights the scope for  
16 further conceptualisation of this construct, particularly in specific populations and  
17 geographical regions.  
18  
19  
20

21 We conducted a systematic review to identify studies that conducted primary research  
22 with adolescents and young adults (10-24) in Africa over the past decade (January 2010-  
23 June 2020), to assess the acceptability of interventions aimed at positively influencing  
24 their developmental outcomes. This paper maps and qualitatively synthesizes the scope,  
25 characteristics, and overall findings of studies identified. This includes evidence  
26 addressing the questions of whether and how the construct of acceptability is  
27 conceptualised and defined within these studies, the methods and indicators used, the  
28 type and key objectives of interventions assessed, as well as evidence on what  
29 adolescents find acceptable and why. Based on these findings, we aim to discuss  
30 implications for future adolescent-focused interventions in Africa and identify gaps for  
31 future acceptability research with this population.  
32  
33  
34  
35  
36  
37  
38

## 39 **Methods**

### 40 **Search strategy**

41  
42 The systematic review was carried out in line with the Preferred Reporting Items for  
43 Systematic Reviews and Meta-Analyses (PRISMA). We used the PICO (Population,  
44 Intervention, Comparison, Outcome) criteria (22) to help determine eligibility criteria for  
45 inclusion develop the search strategy and composite search terms developed (see Table  
46 S1). We searched 8 online databases (listed in Table S1), covering a wide range of  
47 behavioural science research, and searched the reference lists of eligible papers.  
48  
49  
50  
51  
52

### 53 **Study selection and data extraction**

54  
55 Papers were selected based on the following inclusion criteria: if they (i) reported  
56 primary research assessing acceptability (based on the authors' definition of the study or  
57 findings) of one or more intervention(s) with adolescents and young adults 10-24; (ii)  
58 assessed acceptability of intervention(s) aimed at positively influencing one or more  
59  
60

1  
2  
3 development outcome(s), as defined by SDG indicators; (iii) reported on research  
4 conducted in Africa; (iv) were in the English Language; (v) were peer-reviewed and; (vi)  
5 were published between 1<sup>st</sup> January 2010 and 30<sup>th</sup> June 2020. We did not include limiters  
6 for study design or methodological tools, type of intervention or sector, or type of  
7 developmental outcome the intervention intended to influence. To be as inclusive as  
8 possible, we included studies that worked with broader samples (e.g., youth and adults)  
9 but disaggregated the results and reported findings specifically for the age group of  
10 interest (10-24).  
11  
12  
13

14 We imported all references from the online databases into Endnote, where duplicates  
15 were identified and removed. Abstracts were reviewed independently by the two first  
16 authors to determine relevance. Full text of potentially eligible studies were retrieved  
17 and independently examined by the same two authors; areas of disagreement or lack of  
18 clarity were resolved through discussion by the two authors and – where necessary – the  
19 assessment of a third author. Reasons for exclusion of each paper not deemed eligible  
20 were recorded in an excel spread sheet. We developed a detailed extraction sheet, using  
21 Excel software, to extract key characteristics and findings of eligible papers. For  
22 reliability, the information for each paper was extracted separately by at least two of the  
23 first three authors and differences were resolved through discussion among the authors.  
24  
25  
26  
27

## 28 **Patient and public involvement**

29  
30 Patients and the public were not involved in the preparation of this study.  
31

## 32 **Results**

### 33 ***Eligible studies included in the review***

34  
35  
36 Figure 1 presents the PRISMA flow diagram describing the process of study selection and  
37 reasons for study exclusion. A total of 4692 titles and abstracts were screened after  
38 removing duplicates, 278 articles were subjected to a full-text review, and a final 55  
39 studies were considered eligible for inclusion in the review.  
40  
41

42 **Figure 1 here:**

### 43 ***Study characteristics: publication year, location and sample***

44  
45  
46 Below we present a summary of key characteristics of the 55 eligible studies included in  
47 our review. More than half of the papers were published between 2018-2020 with 22% of  
48 the papers published in 2019, as shown in the supplementary figure S1.  
49

50  
51 Fig.2 below provides a visual representation of the location of studies on the continent.  
52 There is a clear concentration of acceptability studies in South and East Africa, with  
53 approximately half of identified studies conducted in South Africa (19) and Uganda (13).  
54 Only seven studies were from West and Central Africa and only one from North Africa.  
55

56 **Figure 2 here:**

57  
58 The supplementary table S2 provides information on study characteristics and overall  
59 findings for the entire list of eligible studies, and by each type of intervention category  
60

1  
2  
3 (as indicated below) in separate sheets. Most (41) study samples included male and  
4 female participants, while 11 studies worked only with females and three with males only.  
5 44 studies worked with samples that fell entirely within the specified age range (10-24),  
6 while 11 included studies worked with broader samples (e.g., youth and adults) but  
7 disaggregated the results and reported findings specifically for the age group of interest.  
8 To be as inclusive as possible, we included 10 studies that did not clearly specify the exact  
9 age range of participants, but for which available information indicated that the sample  
10 would have been entirely or almost entirely within this range (e.g. secondary school and  
11 university students (23-28) or where sample descriptive data indicated a sample  
12 consisting almost entirely of participants 24 or younger (29-31).  
13  
14  
15  
16

17 While our inclusion criteria focused on primary acceptability research with adolescents  
18 and young adults, it should be noted that 25 studies also collected acceptability data  
19 from other stakeholders. These include caregivers or other family members (32-40),  
20 teachers, facilitators (26, 41, 42), community leaders or gate keepers, (28, 43), peer  
21 mentors, service providers and healthcare workers (29, 44-51).  
22  
23  
24  
25

### 26 ***Types and objectives of interventions assessed for acceptability.***

27  
28 We categorised interventions assessed for acceptability both by type of intervention,  
29 based on their key components (see Figure 3), and stated objectives of the interventions  
30 (see Figure 4). In terms of type of intervention, interventions were classified as HIV or  
31 HPV vaccine interventions (10), E-health (10), HIV testing interventions (8), support group  
32 interventions (7), contraceptive interventions (6), voluntary medical male circumcision  
33 programs (VMMC) (4), school-based sexual and reproductive health education (4),  
34 economic support programs (4) and pre-exposure prophylaxis (PrEP) (2). Five studies did  
35 not fit into the above intervention categories and were grouped as 'other'; they  
36 consisted respectively of nutritional therapy, a psychosocial - home based care  
37 intervention, a counselling support intervention to address substance abuse, cervical  
38 cancer screening and a rectal microbicide intervention for HIV prevention. It should be  
39 noted that two of the studies reviewed assessed more than one intervention (45, 52) (3  
40 and 4 respectively), so that the total number of interventions assessed for acceptability  
41 was 60.  
42  
43  
44  
45  
46

### 47 **Figure 3 here:**

48  
49 More detail on intervention sub-types is included in Table S2. For example, E-health  
50 interventions included game based (1), SMS based (7) and internet-based (2) programs.  
51 All 7 support group interventions provided psychosocial or educational support related  
52 to HIV, and 5 worked only with young adults living with HIV. One group intervention was  
53 delivered through both a social media platform and in-person meetings (53), one was a  
54 family based support intervention with adolescent-parent dyads (33), four were linked to  
55 public healthcare facilities (42, 47, 54, 55) and one was a community intervention (43).  
56  
57  
58  
59  
60

1  
2  
3 The primary objectives of most interventions were focused on HIV- or sexual and  
4 reproductive health-related outcomes (see Figure 4): 19 primarily aimed to prevent new  
5 HIV infections, ten to prevent HPV infection, nine to increase HIV treatment adherence  
6 and retention in care, eight to increase the uptake of HIV testing, eight aimed at  
7 increasing contraceptive uptake and reducing early childbearing and six provided  
8 psychosocial support for adolescents living with HIV (42).  
9

10  
11 The objectives of almost all interventions were therefore linked to indicators within SDG3  
12 (ensuring healthy lives and promoting well-being). However, one study could also be  
13 linked to SDG2 (food security and improved nutrition), 6 to SDG4 (inclusive and equitable  
14 quality education), 8 to SDG5 (gender equality) and 1 to SDG6 (access to water and  
15 sanitation).  
16  
17  
18

19 **Figure 4 here:**

### 20 **Definitions and conceptual frameworks for acceptability**

21  
22 Only seven of the 55 reviewed studies provided an explicit definition of acceptability and  
23 only six used a conceptual framework (as indicated in Table S2). Three definitions  
24 focused on the preference for or willingness to use the intervention: Tonen-Wolyec et al  
25 (2019) defined acceptability as consenting to and using the (HIV self-testing)  
26 intervention; Smith, Wallace (30) defined it as the preference for using the (HIV self-  
27 testing) device<sup>33</sup>; and Katahoire et al (2013) defined acceptability as the willingness or  
28 reluctance to use and complete the intervention (in this case the 3 doses of HPV vaccine)  
29 (56).  
30  
31  
32  
33

34 Two definitions focused mainly on responses to the intervention. MacCarthy et al (2020)  
35 (48) referred to a definition and framework developed by Sekhon et al (2017)(20) and  
36 defined acceptability as the cognitive and emotional responses to an intervention (20,  
37 48). Parker et al (2013) (42) defined acceptability as how the intended individual  
38 recipients react to a program, guided by the Bowen feasibility framework (57). A further  
39 two studies conceptualized acceptability as an implementation outcome and focused on  
40 value, appeal and likeability: Kibel et al (2019)(58) referred to the perception among  
41 stakeholders that a certain element of the program was valued, agreeable, or  
42 satisfactory, while Sabben et al (2019)(34) defined acceptability as appeal, relevance,  
43 value, usability, and understandability, based on the Technology Acceptance Model's  
44 (TAM) framework (59).  
45  
46  
47  
48

49 Three studies referred to a conceptual framework but did not provide an explicit  
50 definition of acceptability. In their assessment of individual and environmental barriers  
51 and facilitators related to use of a school-based contraception clinic, Khoza et al (2019)  
52 referred to the social ecological framework (60). Sayles et al's (2010) study was guided  
53 by value-expectancy and social marketing theories (61); the authors investigated vaccine  
54 attitudes, normative vaccine beliefs, and perceived risk and severity of HIV as  
55 determinants of HIV vaccine uptake. Turiho et al's (2017) study used the symbolic  
56 interactionism theory (62) and some aspects of the Health Beliefs Model (HBM) to  
57  
58  
59  
60

1  
2  
3 explain how community members' perceptions and their interaction shape vaccine  
4 acceptability.  
5  
6  
7

### 8 **Study design, methods and indicators**

9  
10 Sixteen studies included in this review (29%) assessed 'anticipated' or prospective  
11 acceptability among adolescents who had not (yet) received the intervention (20). 18  
12 studies (33%) assessed acceptability concurrently, during the delivery of the intervention,  
13 while 14 (25%) assessed acceptability post-intervention, retrospectively. The remaining  
14 seven (13%) of the studies assessed interventions prospectively and retrospectively;  
15 among these, two studies worked with separate groups of adolescents who had received  
16 and not yet received the intervention (52, 63), while the remaining 5 interviewed  
17 adolescents at two different stages of the intervention (40, 44, 55, 64, 65). Five studies  
18 involved adolescents in the study design (43, 50, 53, 55, 65).  
19  
20  
21  
22

23 20 studies described their methodology as solely qualitative, 18 as quantitative and 17 as  
24 mixed methods. 11 of the qualitative studies used only focus group discussions (FGDS), 7  
25 used only in-depth interviews (IDIs) and 2 used both methods. Most of the quantitative  
26 studies (15) employed structured survey questionnaires. The mixed methods studies  
27 combined FGDs or IDIs with survey questionnaires, online surveys and evaluation reports.  
28  
29

30 As detailed in the supplementary table S2, a wide range of questions and indicators were  
31 used to measure acceptability. None of the studies used a standardized previously  
32 validated instrument, although two papers drew from existing instruments (66, 67). The  
33 majority of questions asked across studies covered participants' overall perceptions and  
34 experience of the intervention, willingness to use the intervention, understanding of the  
35 intervention, barriers and facilitators of access and use, the perceived effectiveness of  
36 the intervention and willingness to recommend or distribute it to others.  
37  
38  
39

### 40 **Acceptability findings**

41  
42 Overall, acceptability of interventions assessed was high. Of the 55 studies, 30 assessed  
43 acceptability quantitatively and reported on the proportion of young adults in the sample  
44 that found the intervention acceptable. While some studies quantified acceptability  
45 through a single percentage, based on one question or indicator, a number of studies  
46 reported a range, based on multiple questions or indicators. One of the reviewed studies  
47 reported 100% acceptability (33), while acceptability ranged from 64% - 100% in 25 studies  
48 and 46% - 61% in 2 studies (27, 52, 68, 69). Only two studies clearly reported acceptability  
49 below 50%: at 37% for a contraceptive intervention in Tanzania (70) and 27% for an HPV  
50 vaccine study in Morocco (71). Reasons given for low acceptability of the contraceptive  
51 intervention were that adolescents and their peers were too young to be sensitized  
52 about condoms, that condoms would not be used properly and that using contraception  
53 was a sin (70). Reasons were not provided by adolescents for the Moroccan study;  
54 however, in quantitative analysis, older age, female gender, studying at a public (versus  
55  
56  
57  
58  
59  
60



private) school and lower educational attainment were associated with lower odds of acceptability for the HPV vaccine (71).

The remaining 25 studies did not quantify acceptability. However, the authors of two of these studies reported that adolescents found the interventions to be unacceptable, based on their overall findings. One study in South Africa assessed contraceptive interventions (32); a key reason for low acceptability was the belief that a school-based contraceptive clinic (SBCC) could promote promiscuity by sending a message that 'teenage sex was acceptable' and making contraceptives easily accessible (32). The second study assessed a psychosocial home based care intervention in Tanzania (72), which adolescent participants felt did not align well with their expectations. They believed the intervention to be more relevant to their caregivers and were disappointed in the lack of financial support in a context of widespread poverty (72).

Findings of the remaining 51 studies overall indicated high levels of acceptability. Some of these studies also provided various reasons as to why adolescents found the interventions acceptable (n=22) or (for a minority of adolescents) not acceptable (n=20). These are presented in Table 1, by type of intervention, for studies with both low and high overall acceptability. The main reasons e-Health interventions were acceptable to adolescents were: knowledge gained from the intervention regarding their sexual health (34, 65), the privacy these interventions provided (23, 48) and knowing how to make use of the intervention (25, 34). Adolescents who instead did not find these interventions acceptable felt that the content was not culturally appropriate (23, 25, 65), highlighted technological glitches (48, 50, 65) or were concerned with inclusiveness where, for example, not all the young adults had access to a necessary device or risked unintended disclosure of private information when sharing devices (65, 73).

Confidentiality, appropriateness, privacy and decision-making autonomy were among the reasons adolescents found HIV testing interventions (including self-testing and testing in schools) acceptable (42, 44, 53, 64, 74). Fear of the procedure, concerns with the cost and validity of the test, and inadequate emotional support were reasons given for lack of acceptability (64, 75, 76). Support group interventions were considered acceptable because of the emotional support provided and because young adults found the groups to be empowering and were able to discuss HIV-related issues in a stigma-free environment (42, 47, 53, 55).

Knowledge was a key reason for high vaccine acceptability for both HPV and HIV vaccine interventions. For example, adolescents' understanding that HPV vaccines could prevent cervical cancer and HIV made them more likely to accept the interventions (63). Conversely, lack of knowledge or understanding of the intervention was linked to low acceptability (36, 52, 56). Other reasons given for acceptability were greater female autonomy and agency to protect themselves, in the event of sexual violence or transactional sex, and encouragement of peers (36, 58, 63). On the other hand, perceived cost, myths and distrust of vaccine providers, and fear of side effects, were themes raised to explain low acceptability (61, 77).

Reasons for acceptability of economic support interventions included financial autonomy (78) and the freedom to decide how to use cash transfers (28). However, concerns around the process of selecting which individuals or households were to receive transfers, as well as inclusion, sustainability and effects on social relations and social equity within the community (38, 78), were factors that threatened acceptability.

**Table 1: Reasons provided by adolescents for acceptability and unacceptability of interventions, by type of intervention.**

| Type of intervention | Reasons given for acceptability                                                                                                                                                                                                                                                                                                                                                                                                                                                                                                                                                                     | Reasons given for unacceptability                                                                                                                                                                                                                                                                                                                                                                                                      |
|----------------------|-----------------------------------------------------------------------------------------------------------------------------------------------------------------------------------------------------------------------------------------------------------------------------------------------------------------------------------------------------------------------------------------------------------------------------------------------------------------------------------------------------------------------------------------------------------------------------------------------------|----------------------------------------------------------------------------------------------------------------------------------------------------------------------------------------------------------------------------------------------------------------------------------------------------------------------------------------------------------------------------------------------------------------------------------------|
| <b>eHealth</b>       | <p>Knowledge provided on sexual health and HIV <sup>27,37</sup></p> <p>Privacy <sup>25,51</sup></p> <p>Increased self-efficacy to manage risky situations<sup>37</sup></p> <p>Ease of use <sup>37</sup></p> <p>Supportive mentors <sup>32</sup></p> <p>Freedom to talk openly to mentors about HIV status and disclosure <sup>32</sup></p>                                                                                                                                                                                                                                                          | <p>Visual content considered not culturally appropriate <sup>25</sup></p> <p>Conservative views about certain topics discussed (e.g., oral sex) <sup>27,70</sup></p> <p>Concerns around access and inclusiveness, as not all youth owned devices <sup>70,78</sup></p> <p>Fear of accidental disclosure of confidential information through device-sharing <sup>78</sup></p> <p>Technical glitches with devices <sup>51,53,70</sup></p> |
| <b>Vaccines</b>      | <p>Protection from HPV in the case of sexual abuse or transactional sex <sup>39</sup></p> <p>Protection from HIV infection when the transmission risk is out of an individual's control <sup>48,63</sup></p> <p>Desire to have unprotected sex for child-bearing (women on HIV-vaccine) <sup>63</sup></p> <p>Being able to have unprotected sex and multiple sexual partners (male adolescents on HIV vaccine)<sup>63</sup></p> <p>Protection in serodiscordant relationships while avoiding the HIV stigma and costs related to buying condoms (male adolescents on HIV vaccine) <sup>48</sup></p> | <p>Distrust of government and scientists <sup>63</sup></p> <p>Association of vaccine uptake with promiscuity <sup>63</sup></p> <p>Fear of HIV testing and HIV stigma <sup>63</sup></p> <p>Cost of vaccine <sup>63</sup></p> <p>Fear of vaccine side effects <sup>31,54,63,68</sup></p> <p>Fear of injection <sup>31</sup></p> <p>Lack of knowledge about vaccine and cervical cancer <sup>39,58,67</sup></p>                           |
| <b>HIV testing</b>   | <p>Confidentiality of HIV self-testing at schools <sup>47,81 79</sup></p> <p>Ease of use of HIV self-test <sup>47,81</sup></p> <p>Fast results of self-test<sup>47</sup></p> <p>Ability to test independently with self-test <sup>69</sup></p> <p>Opportunity to know HIV status, for peace of mind and to plan for the future (provider-initiated testing) <sup>42</sup></p> <p>Lower waiting time, less distance to facility, and friendlier staff at mobile (versus 'conventional') clinic<sup>72</sup></p>                                                                                      | <p>Concern with validity of HIVST self-test kit results <sup>69,81</sup></p> <p>Costs of HIV test kit <sup>69</sup></p> <p>Lack of emotional support with self-test<sup>69,81</sup></p> <p>Fear of the procedure (finger prick) <sup>33 80</sup></p> <p>Belief that school is not the right place for HIV testing <sup>79</sup></p> <p>Lack of privacy and risk of stigma through school testing <sup>79</sup></p>                     |
| <b>Support group</b> | <p>Emotional and social support provided <sup>45,50,55,57</sup></p> <p>Knowledge and skills provided <sup>45,57</sup></p> <p>Enjoyed participating <sup>55</sup></p>                                                                                                                                                                                                                                                                                                                                                                                                                                |                                                                                                                                                                                                                                                                                                                                                                                                                                        |

|                                     |                                                                                                                                                                                                                                                                               |                                                                                                                                                                                                                                                                                                                                                                                                                                                                                                                                                                                                                                                                               |
|-------------------------------------|-------------------------------------------------------------------------------------------------------------------------------------------------------------------------------------------------------------------------------------------------------------------------------|-------------------------------------------------------------------------------------------------------------------------------------------------------------------------------------------------------------------------------------------------------------------------------------------------------------------------------------------------------------------------------------------------------------------------------------------------------------------------------------------------------------------------------------------------------------------------------------------------------------------------------------------------------------------------------|
|                                     | Stigma free environment <sup>56</sup><br>Confidential space to openly discuss sexual health and behavior <sup>45,55</sup><br>Greater decision-making autonomy to negotiate safer sexual relationships <sup>45</sup>                                                           |                                                                                                                                                                                                                                                                                                                                                                                                                                                                                                                                                                                                                                                                               |
| <b>SRH education</b>                | Increased knowledge on sexual and reproductive health <sup>26,44</sup><br>Supportive teachers at youth clubs <sup>44</sup><br><br>Girls more comfortable attending school during menstruation <sup>26</sup>                                                                   | Conservative views about certain topics discussed (linked to sexual intercourse) <sup>44</sup>                                                                                                                                                                                                                                                                                                                                                                                                                                                                                                                                                                                |
| <b>VMMC</b>                         | Material support provided during the intervention (e.g. food, shelter and security) <sup>60</sup><br>Knowledge gained through participation <sup>60</sup>                                                                                                                     | Penile swelling after removal and transient discoloration of inner foreskin <sup>82</sup>                                                                                                                                                                                                                                                                                                                                                                                                                                                                                                                                                                                     |
| <b>Economic support</b>             | Increased school retention <sup>30,41,83</sup><br><br>Financial autonomy <sup>30,83</sup><br><br>Easy access to cash transfer <sup>30</sup>                                                                                                                                   | Concerns with sustainability and impact of transfer termination <sup>83</sup><br>Exclusion of certain households or individuals in the community from receiving transfers <sup>30,41</sup><br>Perception that selection process was unfair <sup>41</sup><br><br>Lack of interest in family planning services accessible through (conditional) benefit cards <sup>84</sup>                                                                                                                                                                                                                                                                                                     |
| <b>Contraception</b>                | Ease of use of self-injectable and female contraceptives <sup>71,85</sup><br><br>Privacy and convenience of self-injectable contraceptives <sup>85</sup><br>Female autonomy to control female contraceptive use <sup>48,71</sup><br>Condom fatigue and HIV fear <sup>48</sup> | Conservative views on condom use and messaging (e.g. using condoms is a sin, condoms may encourage early sexual debut) <sup>35,75</sup><br>Belief that adolescents are too young for condom promotion and sexual activity <sup>3</sup><br>Fear of needles and self-injection for injectable contraceptives <sup>85</sup><br>Concerns with not being able to use condoms properly <sup>75</sup><br><br>Belief that condoms cause AIDS and other diseases <sup>75</sup><br><br>Concerns about the effect of cervical contraceptive being in the body for a long time <sup>71</sup><br>Concern with stigma <sup>48</sup><br><br>Waiting times at health facilities <sup>48</sup> |
| <b>PrEP</b>                         | Prevents transmission in serodiscordant couples <sup>48</sup><br><br>Easy to use <sup>48</sup>                                                                                                                                                                                | Conflict with traditional methods and beliefs <sup>48</sup><br><br>Fear of side effects <sup>48</sup>                                                                                                                                                                                                                                                                                                                                                                                                                                                                                                                                                                         |
| <b>Psychosocial home-based care</b> |                                                                                                                                                                                                                                                                               | Program more relevant to caregiver versus adolescent needs <sup>77</sup><br>Lack of financial support in a context of widespread poverty <sup>77</sup>                                                                                                                                                                                                                                                                                                                                                                                                                                                                                                                        |

## Discussion

Findings of this review indicate two positive trends. The first is an increase, over the past decade, in the number of acceptability studies with adolescents on the continent. Though numbers are overall low, this could signal increasing recognition of the value of engaging young people when designing and implementing interventions intended for them. The second is that acceptability of interventions assessed was generally high. This suggests an overall good alignment of interventions with adolescent needs and preferences. However, we should also be aware of the possibility of publication bias (79, 80), as research showing less favourable acceptability results may be less likely to be written up and published. A key limitation of this review is that we did not include grey



1  
2  
3 literature, given available resources, the review's already broad scope, and to ensure a  
4 minimum quality of studies included. We also did not conduct a quality assessment, given  
5 the heterogeneity of interventions assessed and study designs; however, we note that  
6 this is not a requirement of a mapping review, which aims to summarise available  
7 evidence in an area versus focus on a particular research question (81-83).  
8  
9

### 10 11 12 **Acceptability findings** 13

14 Despite the diversity of intervention settings, types of interventions and modes of  
15 delivery across studies, several common themes emerged from reasons given by  
16 adolescents to explain why specific interventions were acceptable to them. These  
17 included the product or intervention being easy to use, knowledge of the intervention or  
18 knowledge provided by the intervention, the intervention allowing for (greater)  
19 autonomy, adolescents feeling supported while participating in the intervention and  
20 feeling assured that their privacy and confidential information would be protected.  
21 Although reasons for 'unacceptability' were more diverse, overarching themes could also  
22 be identified among these, for example: conservative views about the intervention or its  
23 content; concerns around intervention costs, access and inclusiveness; fear of pain and  
24 side effects (for biomedical interventions); stigma, myths or distrust; and lack of  
25 knowledge or support. While certain drivers of unacceptability mirrored those of  
26 acceptability (e.g. knowledge and support), these drivers mostly differed, suggesting  
27 that acceptability and unacceptability are not necessarily represented by one continuum.  
28  
29  
30  
31  
32  
33

34  
35 These findings suggest that intervention developers and implementers across the  
36 continent should pay attention to key aspects of interventions and their delivery that  
37 adolescents clearly care about, and seek to address these from the intervention  
38 development phase. They should ensure that adolescents are provided with adequate  
39 knowledge, training and resources to properly understand the intervention and feel  
40 confident in their ability to use it, that they have access to sufficient logistical and  
41 emotional support while participating, and that their confidential information is  
42 protected, so that they are in turn protected from much-feared stigma and other  
43 potential negative social consequences. Moreover, they should bear in mind that  
44 adolescents value autonomy and that this has a gender dimension. Autonomy relates not  
45 only to being able to choose to participate in and use an intervention, but also being  
46 empowered by the knowledge it may provide and the greater control it may afford  
47 young people (particularly young women) in managing high risk situations and unequal  
48 relationships.  
49  
50  
51  
52  
53  
54

55  
56 It may also be worth paying particular attention to acceptability findings for specific  
57 types of interventions, given current African and global public health challenges. For  
58 example, the role of digital technology in achieving many of the SDGs is well documented  
59  
60

(84) and merits particular attention in the context of the Covid-19 pandemic (85, 86). While young people remain the most connected population group to digital platforms(87), there is a clear digital divide, as more than 60% of young adults in Africa do not have access to internet (88, 89). Findings of this review show overall high acceptability of e-Health interventions (34, 50), as adolescents highlighted opportunities presented by digital technology, for example by reducing the cost of in-person interaction (53). Yet concerns raised around connectivity issues, lack of access to devices and unintended disclosure of confidential information (53, 73) represent challenges for the acceptability, equitable access and effectiveness of e-Health programs. It is therefore important for intervention providers to assess these challenges early on, and to explore ways of potentially increasing access to devices or technologies within the intervention itself or by supporting concurrent initiatives (65).

Low acceptability of several interventions aimed at increasing contraceptive use and HIV testing also merits particular attention, since HIV transmission and relatively low rates of HIV testing and linkage to antiretroviral therapy (ART) remain a concern among young adults (90, 91). Several studies included in this review highlighted, for example, adolescents' fear of stigma and lack of privacy regarding HIV testing interventions in schools (74), concerns about not being able to properly perform oral HIV testing on their own (76) and conservative views of contraceptive promotion and use (32, 70). These perspectives are likely shaped by inadequate understanding of interventions, but also by social norms surrounding sexuality and contraception within adolescents' homes, schools and communities (92, 93). Also, fear of vaccines and their side effects (94, 95) are important to note and address, in relation not only to HPV prevention, but also to the current Covid-19 vaccine rollout.

All of the above examples highlight the importance of strengthening adolescents' knowledge of interventions and how to interact with them, but also of understanding and engaging with the broader context within which adolescent acceptability is shaped (92). One way to achieve this is to involve adolescents (preferably potential end-users) early in the design and planning phase of the intervention and – if possible - at various stages of the intervention life cycle. Yet, as indicated above, less than half of the studies in this review (42%) assessed prospective acceptability and very few studies involved adolescents in the study design and/or at multiple phases of the intervention. There is clearly potential to allow for more meaningful and consistent adolescent engagement, if young people are to have a stronger role in shaping the development, adaptation and scale up of interventions (20).

A second key approach would be to engage early on and assess acceptability with other stakeholders who are central to an intervention being well-targeted, well-implemented and accepted by adolescents and the broader community. These may include intervention implementers and facilitators, but also caregivers, partners and peers, teachers and community leaders. As noted above, 25 studies in this review also assessed acceptability of other types of stakeholders. Future review analyses and acceptability

1  
2  
3 studies could further focus on acceptability among these groups of individuals, and its  
4 implications for adolescent acceptability and intervention success.  
5  
6  
7

### 8 ***Gaps and key areas for future research***

9  
10 Our review highlights several key gaps and related areas for future intervention  
11 acceptability research. First, there appears to be a gap in geographical coverage,  
12 particularly in West, Central and North Africa. However, we note that confining our  
13 search to English language publications may have excluded some studies from African  
14 countries where French is the first language. Given that adolescent needs and  
15 preferences are likely to differ across areas with very different social and cultural norms  
16 and faith contexts (96), we cannot simply extrapolate acceptability findings to other  
17 countries or communities across the continent.  
18  
19

20  
21  
22 Second, there is clearly scope for more acceptability research in important areas for  
23 adolescent development beyond (physical) health and, within the health sector, beyond  
24 HIV. As important as reducing HIV transmission and increasing testing and treatment  
25 adherence may be in this population (90, 91), they are clearly not the only dimensions of  
26 adolescent health and broader wellbeing that merit attention and investment. There is a  
27 glaring lack of acceptability studies in areas of adolescent development beyond SDG 3.  
28 These include education access and outcomes, employment opportunities, access to  
29 water and other services, gender equality and protection from violence, social protection  
30 and mental health (97).  
31  
32

33  
34 The focus on specific types of interventions likely reflects, to a large extent, global health  
35 funding and research priorities over the past decades. There has been a considerable  
36 amount of international aid dedicated to addressing HIV (98, 99) and particular concern  
37 around the acceptability of HIV interventions. Moreover, the concentration of  
38 acceptability research in specific countries in Africa is likely a reflection of disparities in  
39 independent research infrastructure and capacity across the continent (100, 101). It  
40 would also seem that 'acceptability' is a concept and term that has gained traction  
41 primarily within the health sector (20). The extension of acceptability research to  
42 geographical and developmental areas where it is currently scarce therefore cannot be  
43 addressed solely by decisions of individual research teams, but will to some extent  
44 require a change in global health and funding priorities, and the 'adoption' of  
45 acceptability research by other sectors.  
46  
47  
48  
49

50  
51 A third gap highlighted by this review is the considerable scope to further conceptualise  
52 the construct of acceptability, by more clearly defining it and identifying its key  
53 components. Our review reinforced the absence of a clear or standard definition of  
54 acceptability, or common tools and indicators. In fact, the large majority of papers  
55 included in this review (48) referred to the concept of acceptability without defining it at  
56 all, requiring the reader to review the questions and indicators used to gain some  
57 understanding of how the construct of acceptability was conceptualised and  
58 operationalized. As highlighted by other authors, this lack of common definitions and  
59  
60

1  
2  
3 frameworks makes the selection of measurement indicators for empirical enquiry in this  
4 area more difficult and the comparability of acceptability results challenging (102, 103).  
5 There have been recent efforts to address these gaps; in particular, Sekhon and  
6 colleagues' theoretical framework for acceptability (TFA), published in 2017 (20), has  
7 made a valuable contribution to the scarce conceptual literature in the field. However,  
8 there is still much work to be done to apply and test the framework in specific  
9 populations. For example, its relevance and completeness in investigating acceptability  
10 among adolescents, in less-resourced settings and beyond the (biomedical) health sector  
11 is still unclear. Also unclear is the important link between intervention acceptability and  
12 uptake, considering that willingness to use the intervention is often included among  
13 questions used to assess acceptability (see table S2). Lastly, it is encouraging to note that  
14 a relatively large number of studies in our review used mixed methods approaches to  
15 assess acceptability; however, there is clearly still scope to employ and combine more  
16 innovative methodologies (55, 65).  
17  
18  
19  
20  
21  
22  
23

## 24 **Conclusion**

25  
26 As the first systematic review to aggregate and synthesise a decade of acceptability  
27 studies with adolescents in Africa, we believe this study makes a valuable contribution to  
28 the African and global literature on acceptability. It highlights the overall high level of  
29 acceptability of the interventions assessed, and some of the reasons why adolescents  
30 and young adults may or may not find interventions acceptable– both specific to  
31 particular types of interventions and common across intervention types.  
32  
33

34  
35 However, it also exposes considerable scope for future acceptability research and review  
36 work, to extend and strengthen the existing body of evidence. This should include:  
37 extending acceptability research beyond the health (and particularly HIV) sector and to  
38 countries in Africa where this type of research is still scarce; including adolescents and  
39 other potential key stakeholders earlier, and potentially throughout, the intervention  
40 process; further conceptualising the construct of acceptability; and investigating the  
41 relationship between acceptability and intervention uptake and success.  
42  
43  
44  
45  
46

## 47 **Data availability statement**

48 Data are available in a public, open-access repository. All data relevant to the study are  
49 included in the article or uploaded as supplementary information.  
50  
51

## 52 **Ethics statements**

## 53 **Patient consent for publication**

54 Not required.  
55  
56  
57  
58  
59  
60

**Acknowledgements:** ODS, MC, GH, CD, LC and LS receive funding from the UKRI GCRF Accelerating Achievement for Africa's Adolescents (Accelerate) Hub (Grant Ref: ES/S008101/1).

**Contributors:** ODS and MC were involved in the conceptualisation of the paper, the data extraction and analysis, and the manuscript writing; GH was part of the data extraction and analysis, and reviewed and revised the manuscript; CD reviewed and revised the manuscript; LC reviewed and revised the manuscript; and LS reviewed and revised the manuscript. All authors read, reviewed and approved the final manuscript.

**Competing interests:** None declared.

## References

1. Cluver LD, Orkin FM, Meinck F, Boyes ME, Yakubovich AR, Sherr L. Can social protection improve sustainable development goals for adolescent health? *PloS one*. 2016;11(10):e0164808.
2. Bhutta ZA, Yount KM, Bassat Q, Arikainen AA. Revisiting child and adolescent health in the context of the Sustainable Development Goals. Public Library of Science San Francisco, CA USA; 2020.
3. Sheehan P, Sweeny K, Rasmussen B, Wils A, Friedman HS, Mahon J, et al. Building the foundations for sustainable development: a case for global investment in the capabilities of adolescents. *The Lancet*. 2017;390(10104):1792-806.
4. United Nations Department of Economic Social Affairs UN. 2019 Revision of World Population Prospects. 2019.
5. Tiwari S, Daidone S, Ruvalcaba MA, Pifti E, Handa S, Davis B, et al. Impact of cash transfer programs on food security and nutrition in sub-Saharan Africa: A cross-country analysis. *Global Food Security*. 2016;11:72-83.
6. Kilburn K, Ferrone L, Pettifor A, Wagner R, Gómez-Olivé FX, Kahn K. The Impact of a Conditional Cash Transfer on Multidimensional Deprivation of Young Women: Evidence from South Africa's HTPN 068. *Social Indicators Research*. 2020;151(3):865-95.
7. Super S, Hermens N, Verkooijen K, Koelen M. Examining the relationship between sports participation and youth developmental outcomes for socially vulnerable youth. *BMC Public Health*. 2018;18(1):1012.
8. World Health Organization. Why invest in adolescent health? 2021 [Available from: [https://www.who.int/maternal\\_child\\_adolescent/topics/adolescence/why-invest/en/](https://www.who.int/maternal_child_adolescent/topics/adolescence/why-invest/en/)].
9. Dahl RE, Allen NB, Wilbrecht L, Suleiman AB. Importance of investing in adolescence from a developmental science perspective. *Nature*. 2018;554(7693):441-50.
10. Lutz W, Crespo Cuaresma J, Kebede E, Prskawetz A, Sanderson WC, Striessnig E. Education rather than age structure brings demographic dividend. *Proc Natl Acad Sci U S A*. 2019;116(26):12798-803.
11. Bongaarts J, Gragnolati M, Ahmed S, Corker J. Population, development, and policy. 2020.
12. Salam RA, Das JK, Lassi ZS, Bhutta ZA. Adolescent health interventions: Conclusions, evidence gaps, and research priorities. *Journal of Adolescent Health*. 2016;59(4):S88-S92.
13. Chandra-Mouli V, Lane C, Wong S. What Does Not Work in Adolescent Sexual and Reproductive Health: A Review of Evidence on Interventions Commonly Accepted as Best Practices. *Global Health: Science and Practice*. 2015;3(3):333.



14. World Health Organization. Global standards for quality health-care services for adolescents: a guide to implement a standards-driven approach to improve the quality of health care services for adolescents. 2015.
15. Malti T, Noam GG, Beelmann A, Sommer S. Toward dynamic adaptation of psychological interventions for child and adolescent development and mental health. *Journal of Clinical Child & Adolescent Psychology*. 2016;45(6):827-36.
16. Patton GC, Sawyer SM, Ross DA, Viner RM, Santelli JS. From Advocacy to Action in Global Adolescent Health. *Journal of Adolescent Health*. 2016;59(4):375-7.
17. Burt MR. Reasons to invest in adolescents. *Journal of adolescent Health*. 2002;31(6):136-52.
18. Stok FM, de Ridder DTD, de Vet E, Nureeva L, Luszczynska A, Wardle J, et al. Hungry for an intervention? Adolescents' ratings of acceptability of eating-related intervention strategies. *BMC Public Health*. 2016;16(1):5.
19. Silva MR, Collier-Meek MA, Coddling RS, DeFouw ER. Acceptability assessment of school psychology interventions from 2005 to 2017. *Psychology in the Schools*. 2020;57(1):62-77.
20. Sekhon M, Cartwright M, Francis JJ. Acceptability of healthcare interventions: an overview of reviews and development of a theoretical framework. *BMC Health Services Research*. 2017;17(1):88.
21. Yeager DS, Dahl RE, Dweck CS. Why interventions to influence adolescent behavior often fail but could succeed. *Perspectives on Psychological Science*. 2018;13(1):101-22.
22. O'Connor D, Green S, Higgins JP. Defining the review question and developing criteria for including studies. *Cochrane handbook for systematic reviews of interventions: Cochrane book series*. 2008:81-94.
23. Bull S, Nabembezi D, Birungi R, Kiwanuka J, Ybarra M. Cyber-Senga: Ugandan youth preferences for content in an internet-delivered comprehensive sexuality education programme. *East African journal of public health*. 2010;7(1):58-63.
24. Kansime C, Hytti L, Nalugya R, Nakuya K, Namirembe P, Nakalema S, et al. Menstrual health intervention and school attendance in Uganda (MENISCUS-2): a pilot intervention study. *BMJ open*. 2020;10(2).
25. Ybarra ML, Bull SS, Prescott TL, Birungi R. Acceptability and feasibility of CyberSenga: an Internet-based HIV-prevention program for adolescents in Mbarara, Uganda. *AIDS Care*. 2014;26(4):441-7.
26. Herman L, Ovuga E, Mshilla M, Ojara S, Kimbugwe G, Adrawa AP, et al. Knowledge, Perceptions and Acceptability to Strengthening Adolescents' Sexual and Reproductive Health Education amongst Secondary Schools in Gulu District. *World academy of science, engineering and technology*. 2013;7(7):1787-802.
27. Mitchell KJ, Bull S, Kiwanuka J, Ybarra ML. Cell phone usage among adolescents in Uganda: acceptability for relaying health information. *Health Education Research*. 2011;26(5):770-81.
28. Banda E, Svanemyr J, Sandøy IF, Goicolea I, Zulu JM. Acceptability of an economic support component to reduce early pregnancy and school dropout in Zambia: a qualitative case study. *Global Health Action*. 2019;12(1):1-11.
29. Hacking D, Mgengwana-Mbakaza Z, Cassidy T, Runeyi P, Duran LT, Mathys RH, et al. Peer mentorship via mobile phones for newly diagnosed HIV-positive youths in clinic care in Khayelitsha, South Africa: Mixed methods study. *Journal of Medical Internet Research*. 2019;21(12).
30. Smith P, Wallace M, Bekker LG. Adolescents' experience of a rapid HIV self-testing device in youth-friendly clinic settings in Cape Town South Africa: a cross-sectional community based usability study. *Journal of the International Aids Society*. 2016;19.
31. Ayissi CA, Wamai RG, Oduwo GO, Perlman S, Welty E, Welty T, et al. Awareness, acceptability and uptake of human papilloma virus vaccine among Cameroonian school-attending female adolescents. *Journal of community health*. 2012;37(6):1127-35.
32. Khoza N, Zulu P, Shung-King M. Acceptability and feasibility of a school-based contraceptive clinic in a low-income community in South Africa. *Primary Health Care Research & Development (Cambridge University Press / UK)*. 2019;20:N.PAG-N.PAG.

- 1
- 2
- 3 33. Kuo C, Mathews C, Giovenco D, Atujuna M, Beardslee W, Hoare J, et al. Acceptability,
- 4 Feasibility, and Preliminary Efficacy of a Resilience-Oriented Family Intervention to Prevent
- 5 Adolescent HIV and Depression: A Pilot Randomized Controlled Trial. *AIDS Education & Prevention.*
- 6 2020;32(1):67-81.
- 7
- 8 34. Sabben G, Mudhune V, Ondeng'e K, Odero I, Ndivo R, Akelo V, et al. A Smartphone Game to
- 9 Prevent HIV Among Young Africans (Tumaini): Assessing Intervention and Study Acceptability Among
- 10 Adolescents and Their Parents in a Randomized Controlled Trial. *JMIR mHealth and uHealth.*
- 11 2019;7(5):e13049.
- 12
- 13 35. Carney T, Johnson K, Carrico A, Myers B. Acceptability and feasibility of a brief substance use
- 14 intervention for adolescents in Cape Town, South Africa: A pilot study. *International journal of*
- 15 *psychology : Journal international de psychologie.* 2020.
- 16
- 17 36. Katz IT, Nkala B, Dietrich J, Wallace M, Bekker LG, Pollenz K, et al. A Qualitative Analysis of
- 18 Factors Influencing HPV Vaccine Uptake in Soweto, South Africa among Adolescents and Their
- 19 Caregivers. *Plos One.* 2013;8(8).
- 20
- 21 37. Niasse F, Varloteaux M, Diop K, Ndiaye SM, Diouf FN, Mbodj PB, et al. Adherence to ready-
- 22 to-use food and acceptability of outpatient nutritional therapy in HIV-infected undernourished
- 23 Senegalese adolescents: research-based recommendations for routine care. *Bmc Public Health.*
- 24 2020;20(1).
- 25
- 26 38. MacPhail C, Adato M, Kahn K, Selin A, Twine R, Khoza S, et al. Acceptability and Feasibility of
- 27 Cash Transfers for HIV Prevention Among Adolescent South African Women. *AIDS & Behavior.*
- 28 2013;17(7):2301-12.
- 29
- 30 39. Ferrand RA, Trigg C, Bandason T, Ndhlovu CE, Mungofa S, Nathoo K, et al. Perception of Risk
- 31 of Vertically Acquired HIV Infection and Acceptability of Provider-Initiated Testing and Counseling
- 32 Among Adolescents in Zimbabwe. *American Journal of Public Health.* 2011;101(12):2325-32.
- 33
- 34 40. Jayeoba O, Dryden-Peterson S, Okui L, Smeaton L, Magetse J, Makori L, et al. Acceptability of
- 35 male circumcision among adolescent boys and their parents, Botswana. *AIDS and Behavior.*
- 36 2012;16(2):340-9.
- 37
- 38 41. Chirwa-Kambole E, Svanemyr J, Sandoy I, Hangoma P, Zulu JM. Acceptability of youth clubs
- 39 focusing on comprehensive sexual and reproductive health education in rural Zambian schools: a
- 40 case of Central Province. *Bmc Health Services Research.* 2020;20(1).
- 41
- 42 42. Parker L, Maman S, Pettifor A, Chalachala JL, Edmonds A, Golin CE, et al. Feasibility analysis
- 43 of an evidence-based positive prevention intervention for youth living with HIV/AIDS in Kinshasa,
- 44 Democratic Republic of the Congo. *AIDS Education and Prevention.* 2013;25(2):135-50.
- 45
- 46 43. Knopf A, Agot K, Sidle J, Naanyu V, Morris M. "This is the medicine:" A Kenyan community
- 47 responds to a sexual concurrency reduction intervention. *Social Science & Medicine.* 2014;108:175-
- 48 84.
- 49
- 50 44. Tonen-Wolyec S, Batina-Agasa S, Muwonga J, Bouassa RSM, Tshilumba CK, Belec L.
- 51 Acceptability, feasibility, and individual preferences of blood-based HIV self-testing in a population-
- 52 based sample of adolescents in Kisangani, Democratic Republic of the Congo. *Plos One.* 2019;14(7).
- 53
- 54 45. Atujuna M, Newman PA, Wallace M, Eluhu M, Rubincam C, Brown B, et al. Contexts of
- 55 vulnerability and the acceptability of new biomedical HIV prevention technologies among key
- 56 populations in South Africa: A qualitative study. *PLoS ONE.* 2018;13(2):1-17.
- 57
- 58 46. Giovenco D, Kuo C, Underhill K, Hoare J, Operario D. "The Time Has Arrived": Perceptions of
- 59 Behavioral Adjustments in the Context of Pre-Exposure Prophylaxis Availability Among Adolescents
- 60 in South Africa. *AIDS Education & Prevention.* 2018;30(6):463-73.
- 
47. James S, Martin CE, Moalusi B, Beery M, Pahad S, Imrie J. Integrated access to care and
- treatment (I ACT) support groups for adolescents living with HIV in public healthcare facilities in
- South Africa: feasibility and acceptability for scaling up. *AIDS Care.* 2018;30(9):1107-13.
48. MacCarthy S, Wagner Z, Mendoza-Graf A, Gutierrez CI, Samba C, Birungi J, et al. A
- randomized controlled trial study of the acceptability, feasibility, and preliminary impact of SITA
- (SMS as an Incentive To Adhere): a mobile technology-based intervention informed by behavioral

- 1  
2  
3 economics to improve ART adherence among youth in Uganda. *BMC Infectious Diseases*.  
4 2020;20(1):1-10.
- 5 49. Tabong PT, Maya ET, Adda-Balinia T, Kusi-Appouh D, Birungi H, Tabsoba P, et al.  
6 Acceptability and stakeholders perspectives on feasibility of using trained psychologists and health  
7 workers to deliver school-based sexual and reproductive health services to adolescents in urban  
8 Accra, Ghana. *Reproductive health*. 2018;15(1):122.
- 9 50. Laidlaw R, Dixon D, Morse T, Beattie TK, Kumwenda S, Mpmemberera G. Using participatory  
10 methods to design an mHealth intervention for a low income country, a case study in Chikwawa,  
11 Malawi. *BMC Medical Informatics & Decision Making*. 2017;17:1-12.
- 12 51. Turiho AK, Okello ES, Muhwezi WW, Katahoire AR. Perceptions of human papillomavirus  
13 vaccination of adolescent schoolgirls in western Uganda and their implications for acceptability of  
14 HPV vaccination: a qualitative study. *BMC research notes*. 2017;10(1):431.
- 15 52. Mburu A, Itsura P, Mabeya H, Kaaria A, Brown DR. Knowledge of Cervical Cancer and  
16 Acceptability of Prevention Strategies Among Human Papillomavirus-Vaccinated and Human  
17 Papillomavirus-Unvaccinated Adolescent Women in Eldoret, Kenya. *Bioresearch Open Access*.  
18 2019;8(1):139-45.
- 19 53. Dulli L, Ridgeway K, Packer C, Murray KR, Mumuni T, Plourde KF, et al. A Social Media-Based  
20 Support Group for Youth Living With HIV in Nigeria (SMART Connections): Randomized Controlled  
21 Trial. *Journal of medical Internet research*. 2020;22(6):e18343.
- 22 54. Barker D, Enimil A, Galárraga O, Bosomtwe D, Mensah N, Thamocharan S, et al. In-Clinic  
23 Adolescent Peer Group Support for Engagement in Sub-Saharan Africa: A Feasibility and  
24 Acceptability Trial. *Journal of the International Association of Providers of AIDS Care*. 2019;18:1-8.
- 25 55. Snyder K, Wallace M, DUBY Z, Aquino LDH, Stafford S, Hosek S, et al. Preliminary results from  
26 Hlanganani (Coming Together): A structured support group for HIV-infected adolescents piloted in  
27 Cape Town, South Africa. *Children and Youth Services Review*. 2014;45:114-21.
- 28 56. Katahoire AR, Wani JA, Murokora D, Mugisha E, LaMontague DS. Acceptability of HPV  
29 vaccine among young adolescent girls in Uganda: Young people's perspectives count. *International  
30 Journal of Child and Adolescent Health*. 2013;6(2):211-9.
- 31 57. Bowen DJ, Kreuter M, Spring B, Cofta-Woerpel L, Linnan L, Weiner D, et al. How we design  
32 feasibility studies. *American journal of preventive medicine*. 2009;36(5):452-7.
- 33 58. Kibel M, Shah P, Ayuku D, Makori D, Kamaara E, Choge E, et al. Acceptability of a pilot  
34 intervention of voluntary medical male circumcision and HIV education for street-connected youth  
35 in Western Kenya. *Journal of Adolescent Health*. 2019;64(1):43-8.
- 36 59. Davis FD. User acceptance of information technology: system characteristics, user  
37 perceptions and behavioral impacts. *International Journal of Man-Machine Studies*. 1993;38(3):475-  
38 87.
- 39 60. Golden SD, Earp JAL. Social Ecological Approaches to Individuals and Their Contexts: Twenty  
40 Years of Health Education & Behavior Health Promotion Interventions. *Health Education & Behavior*.  
41 2012;39(3):364-72.
- 42 61. Sayles JN, Macphail CL, Newman PA, Cunningham WE. Future HIV Vaccine Acceptability  
43 Among Young Adults in South Africa. *Health Education & Behavior*. 2010;37(2):193-210.
- 44 62. Jeon YH. The application of grounded theory and symbolic interactionism. *Scandinavian  
45 journal of caring sciences*. 2004;18(3):249-56.
- 46 63. Turiho AK, Okello ES, Muhwezi WW, Harvey S, Byakika-Kibwika P, Meya D, et al. Effect of  
47 school-based human papillomavirus (hpv) vaccination on adolescent girls' knowledge and  
48 acceptability of the HPV vaccine in Ibanda District in Uganda. *African journal of reproductive health*.  
49 2014;18(4):45-53.
- 50 64. Ritchwood TD, Selin A, Pettifor A, Lippman SA, Gilmore H, Kimaru L, et al. HIV self-testing:  
51 South African young adults' recommendations for ease of use, test kit contents, accessibility, and  
52 supportive resources. *Bmc Public Health*. 2019;19.
- 53  
54  
55  
56  
57  
58  
59  
60



- 1
- 2
- 3
- 4 65. Ybarra ML, Agaba E, Chen E, Nyemara N. Iterative Development of In This toGether, the First
- 5 mHealth HIV Prevention Program for Older Adolescents in Uganda. *AIDS and behavior*. 2020.
- 6 66. van der Straten A, Sahin-Hodoglugil N, Clouse K, Mtetwa S, Chirenje MZ. Feasibility and
- 7 potential acceptability of three cervical barriers among vulnerable young women in Zimbabwe. *The*
- 8 *journal of family planning and reproductive health care*. 2010;36(1):13-9.
- 9 67. Smith P, Tolla T, Marcus R, Bekker L-G. Mobile sexual health services for adolescents:
- 10 investigating the acceptability of youth-directed mobile clinic services in Cape Town, South Africa.
- 11 *BMC Health Services Research*. 2019;19(1):N.PAG-N.PAG.
- 12 68. Peltzer K, Mlambo M. Prevalence and Acceptability of Male Circumcision among Young Men
- 13 in South Africa. *Studies on Ethno-Medicine*. 2012;6(3):179-86.
- 14 69. Cele MA, Archary M. Acceptability of short text messages to support treatment adherence
- 15 among adolescents living with HIV in a rural and urban clinic in KwaZulu-Natal. *Southern African*
- 16 *journal of HIV medicine*. 2019;20(1):976.
- 17 70. Exavery A, Mubyazi GM, Rugemalila J, Mushi AK, Massaga JJ, Malebo HM, et al. Acceptability
- 18 of condom promotion and distribution among 10-19 year-old adolescents in Mpwapwa and Mbeya
- 19 rural districts, Tanzania. *BMC Public Health*. 2012;12:569.
- 20 71. Zouheir Y, Daouam S, Hamdi S, Alaoui A, Fechtali T. Knowledge of human papillomavirus and
- 21 acceptability to vaccinate in adolescents and young adults of the Moroccan population. *Journal of*
- 22 *pediatric and adolescent gynecology*. 2016;29(3):292-8.
- 23 72. Busza J, Besana GVR, Mapunda P, Oliveras E. Meeting the needs of adolescents living with
- 24 HIV through home based care: Lessons learned from Tanzania. *Children and Youth Services Review*.
- 25 2014;45:137-42.
- 26 73. Rana Y, Haberer J, Huang H, Kambugu A, Mukasa B, Thirumurthy H, et al. Short message
- 27 service (SMS)-based intervention to improve treatment adherence among HIV-positive youth in
- 28 Uganda: focus group findings. *PLoS One*. 2015;10(4):e0125187.
- 29 74. Madiba S, Mokgatle M. "Students want HIV testing in schools" a formative evaluation of the
- 30 acceptability of HIV testing and counselling at schools in Gauteng and North West provinces in South
- 31 Africa. *BMC Public Health*. 2015;15(1):1-9.
- 32 75. Shanaube K, Schaap A, Chaila MJ, Floyd S, Mackworth-Young C, Hoddinott G, et al.
- 33 Community intervention improves knowledge of HIV status of adolescents in Zambia: findings from
- 34 HPTN 071-PopART for youth study. *Aids*. 2017;31 Suppl 3(Suppl 3):S221-s32.
- 35 76. Hector J, Davies MA, Dekker-Boersema J, Aly MM, Abdalad CCA, Langa EBR, et al.
- 36 Acceptability and performance of a directly assisted oral HIV self-testing intervention in adolescents
- 37 in rural Mozambique. *Plos One*. 2018;13(4).
- 38 77. Hoque ME, Ghuman S, Van Hal G. Human Papillomavirus Vaccination Acceptability among
- 39 Female University Students in South Africa. *Asian Pacific Journal of Cancer Prevention*.
- 40 2013;14(8):4865-9.
- 41 78. Khoza N, Stadler J, MacPhail C, Chikandiwa A, Brahmabhatt H, Delany-Moretlwe S. Cash
- 42 transfer interventions for sexual health: meanings and experiences of adolescent males and females
- 43 in inner-city Johannesburg. *BMC Public Health*. 2018;18:1-N.PAG.
- 44 79. Nat Hum Behav. The importance of no evidence. 2019;3:197.
- 45 80. Mlinarić A, Horvat M, Šupak Smolčić V. Dealing with the positive publication bias: Why you
- 46 should really publish your negative results. *Biochem Med*. 2017;27(3):030201.
- 47 81. Archibald D, Patterson R, Haraldsdottir E, Hazelwood M, Fife S, Murray SA. Mapping the
- 48 progress and impacts of public health approaches to palliative care: a scoping review protocol. *BMJ*
- 49 *open*. 2016;6(7):e012058.
- 50 82. James K, Randall N, Haddaway N. A methodology for systematic mapping in environmental
- 51 sciences. *Environmental Evidence* 2016; 5: 7.
- 52 83. Grant MJ, Booth A. A typology of reviews: an analysis of 14 review types and associated
- 53 methodologies. *Health information and libraries journal*. 2009;26(2):91-108.
- 54
- 55
- 56
- 57
- 58
- 59
- 60

- 1
- 2
- 3
- 4 84. World Health Organization. WHO guideline: recommendations on digital interventions for
- 5 health system strengthening: World Health Organization; 2019.
- 6 85. Unicef. Beyond Masks: Societal impacts of COVID-19 and accelerated solutions for children
- 7 and adolescents. 2020.
- 8 86. Boydell KM, Hodgins M, Pignatiello A, Teshima J, Edwards H, Willis D. Using technology to
- 9 deliver mental health services to children and youth: a scoping review. *J Can Acad Child Adolesc*
- 10 *Psychiatry*. 2014;23(2):87-99.
- 11 87. Jolly S, Oosterhoff P, Faith B, Braeken D, Shephard K. A Review of the Evidence: Sexuality
- 12 Education for Young People in Digital Spaces. 2020.
- 13 88. Keeley B, Little C. The State of the Worlds Children 2017: Children in a Digital World: ERIC;
- 14 2017.
- 15 89. Gunnlaugsson G, Whitehead TA, Baboudóttir FNd, Baldé A, Jandi Z, Boiro H, et al. Use of
- 16 Digital Technology among Adolescents Attending Schools in Bissau, Guinea-Bissau. *International*
- 17 *Journal of Environmental Research and Public Health*. 2020;17(23):8937.
- 18 90. Sam-Agudu NA, Folayan MO, Ezeanolue EE. Seeking wider access to HIV testing for
- 19 adolescents in sub-Saharan Africa. *Pediatric research*. 2016;79(6):838-45.
- 20 91. Reif LK, Abrams EJ, Arpadi S, Elul B, McNairy ML, Fitzgerald DW, et al. Interventions to
- 21 Improve Antiretroviral Therapy Adherence Among Adolescents and Youth in Low- and Middle-
- 22 Income Countries: A Systematic Review 2015–2019. *AIDS and Behavior*. 2020;24(10):2797-810.
- 23 92. Cislighi B, Shakya H. Social Norms and Adolescents' Sexual Health: An Introduction for
- 24 Practitioners Working in Low and Mid-income African countries. *African journal of reproductive*
- 25 *health*. 2018;22(1):38-46.
- 26 93. Sanchez EK, Speizer IS, Tolley E, Calhoun LM, Barrington C, Olumide AO. Influences on
- 27 seeking a contraceptive method among adolescent women in three cities in Nigeria. *Reproductive*
- 28 *Health*. 2020;17(1):167.
- 29 94. Sisson H, Wilkinson Y. An Integrative Review of the Influences on Decision-Making of Young
- 30 People About Human Papillomavirus Vaccine. *The Journal of School Nursing*. 2019;35(1):39-50.
- 31 95. Karlsson LC, Soveri A, Lewandowsky S, Karlsson L, Karlsson H, Nolvi S, et al. Fearing the
- 32 disease or the vaccine: The case of COVID-19. *Personality and Individual Differences*.
- 33 2021;172:110590.
- 34 96. Sommers M. *The outcast majority: War, development, and youth in Africa*: University of
- 35 Georgia Press; 2015.
- 36 97. United Nations. *The Sustainable Development Goals Report 2019*: United Nations; 2019.
- 37 98. Smith J, Whiteside A. **The history of AIDS exceptionalism**. *J Int AIDS Soc*. 2010;13(47).
- 38 99. Sands P. HIV: from exceptionalism to endgame. *The Lancet* 2018;398:261-2.
- 39 100. Laabes E, Desai R, Zawedde S, Glew R. How much longer will Africa have to depend on
- 40 western nations for support of its capacity-building efforts for biomedical research? *Tropical*
- 41 *medicine & international health : TM & IH*. 2011;16(3):258-62.
- 42 101. Kasprowicz V, Chopera D, Waddilove K, Kasprowicz V, Chopera D, Waddilove K, et al. African-
- 43 led health research and capacity building- is it working? *BMC Public Health*. 2020;20(1104).
- 44 102. Bautista T, James D, Amaro H. Acceptability of mindfulness-based interventions for
- 45 substance use disorder: A systematic review. *Complementary therapies in clinical practice*.
- 46 2019;35:201-7.
- 47 103. Berry N, Lobban F, Emsley R, Bucci S. Acceptability of Interventions Delivered Online and
- 48 Through Mobile Phones for People Who Experience Severe Mental Health Problems: A Systematic
- 49 Review. *Journal of medical Internet research*. 2016;18(5):e121.
- 50
- 51
- 52
- 53
- 54
- 55
- 56
- 57
- 58
- 59
- 60

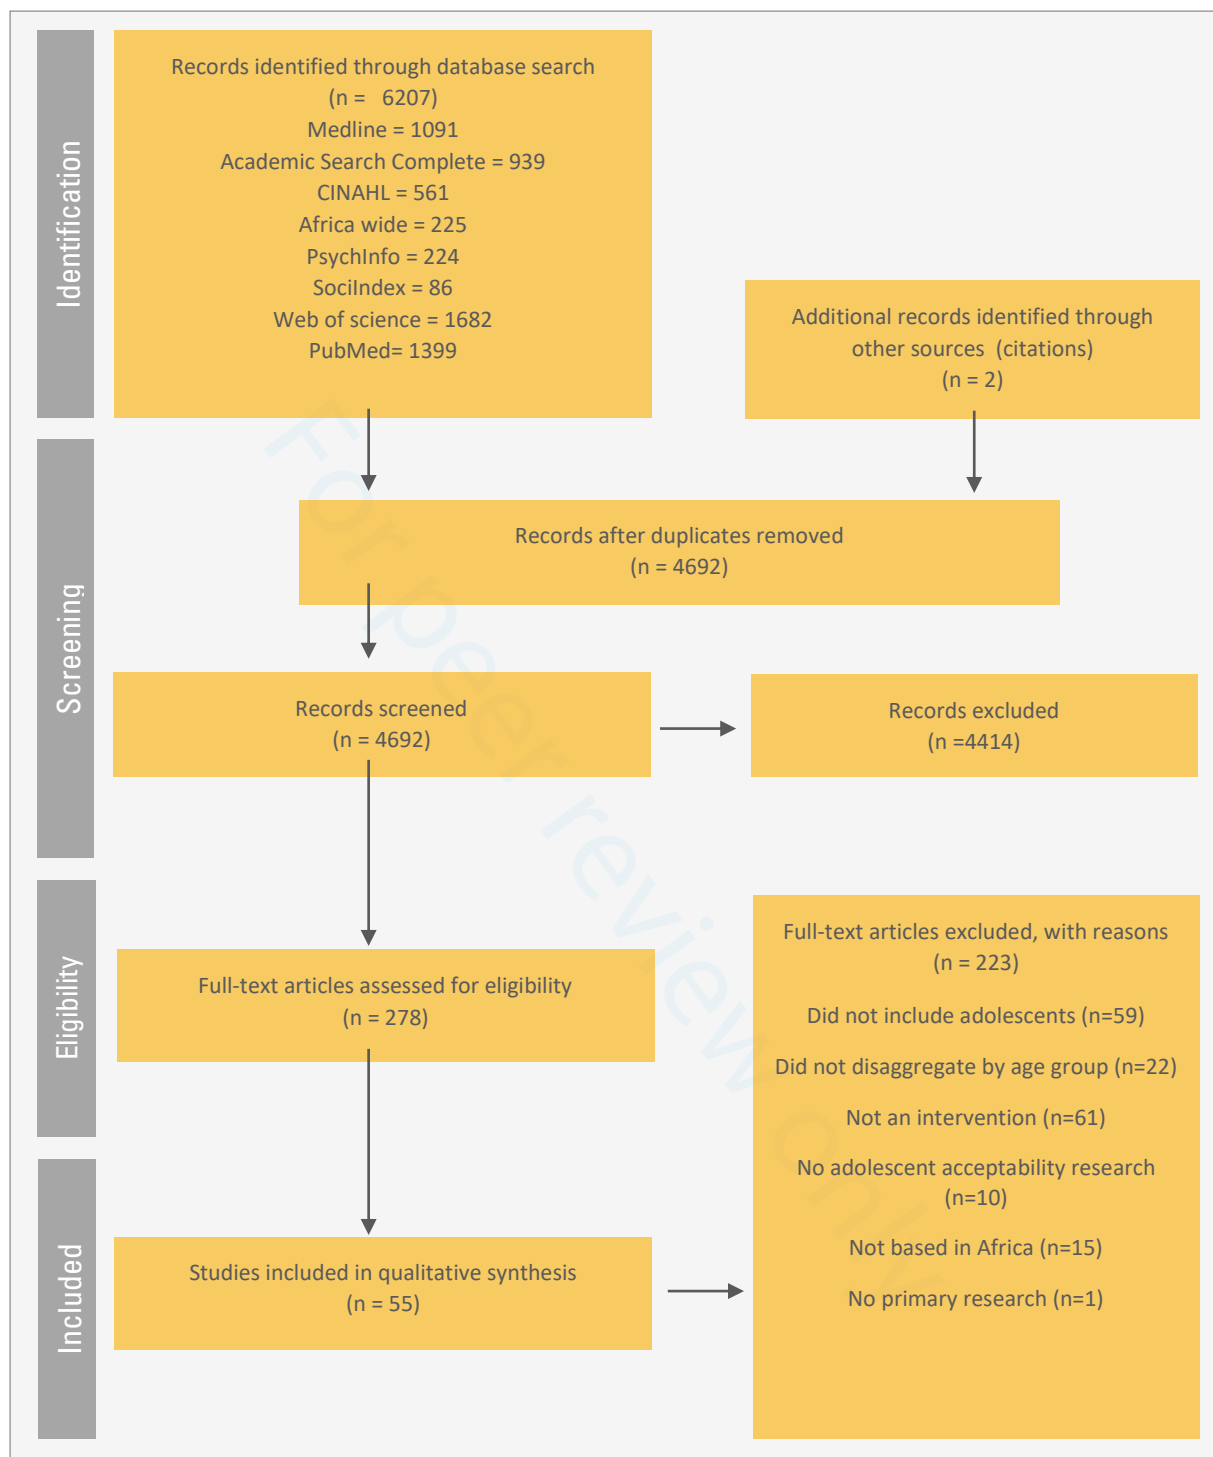

Figure 1: The PRISMA flow diagram describing the process of study selection.

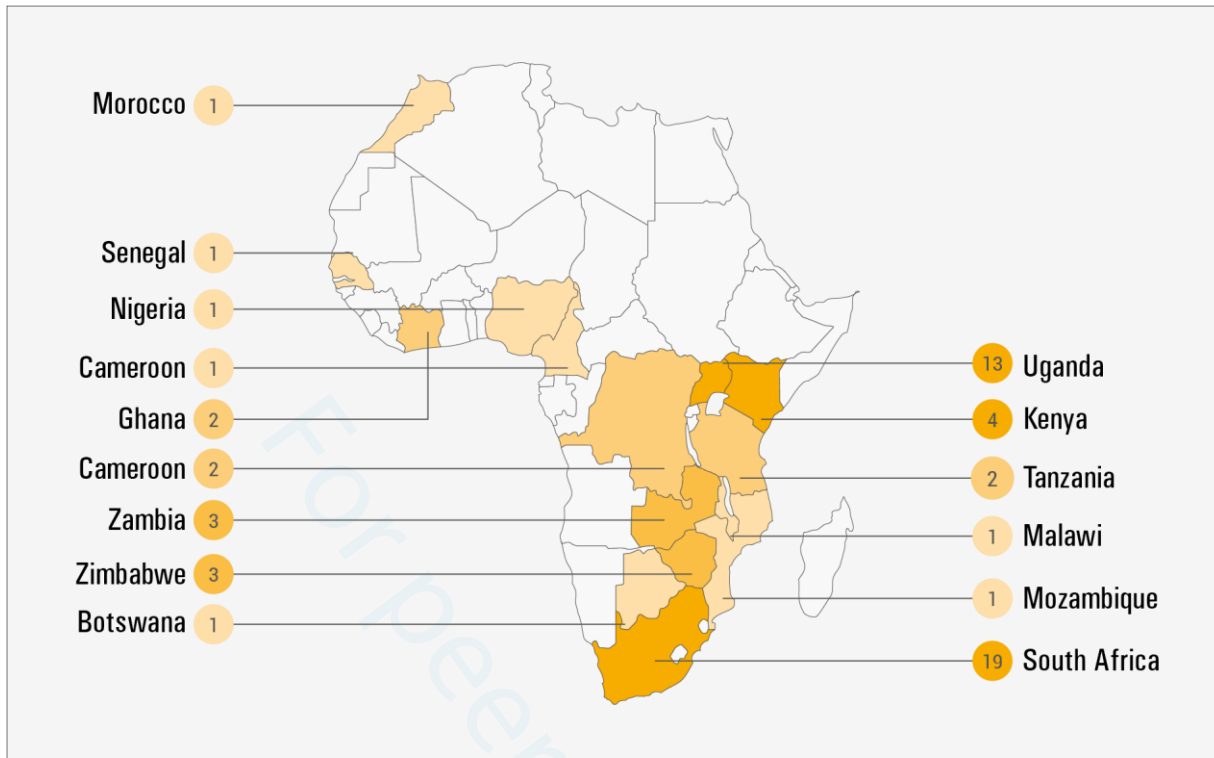

Figure 2: Study Location

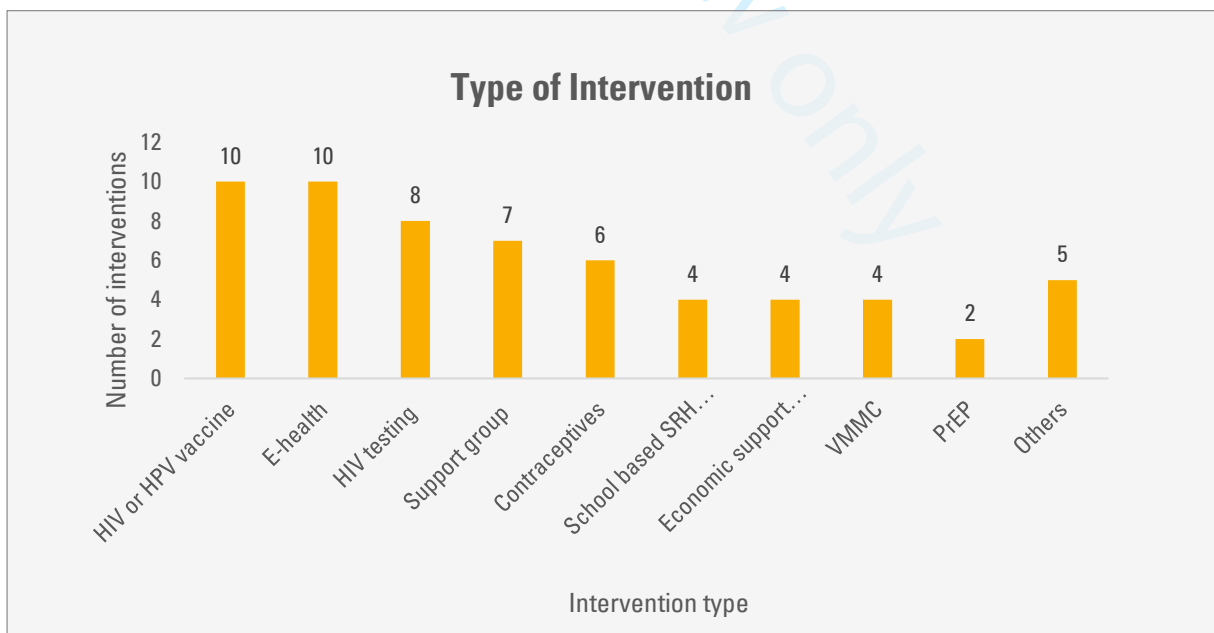

Figure 3: Intervention Types

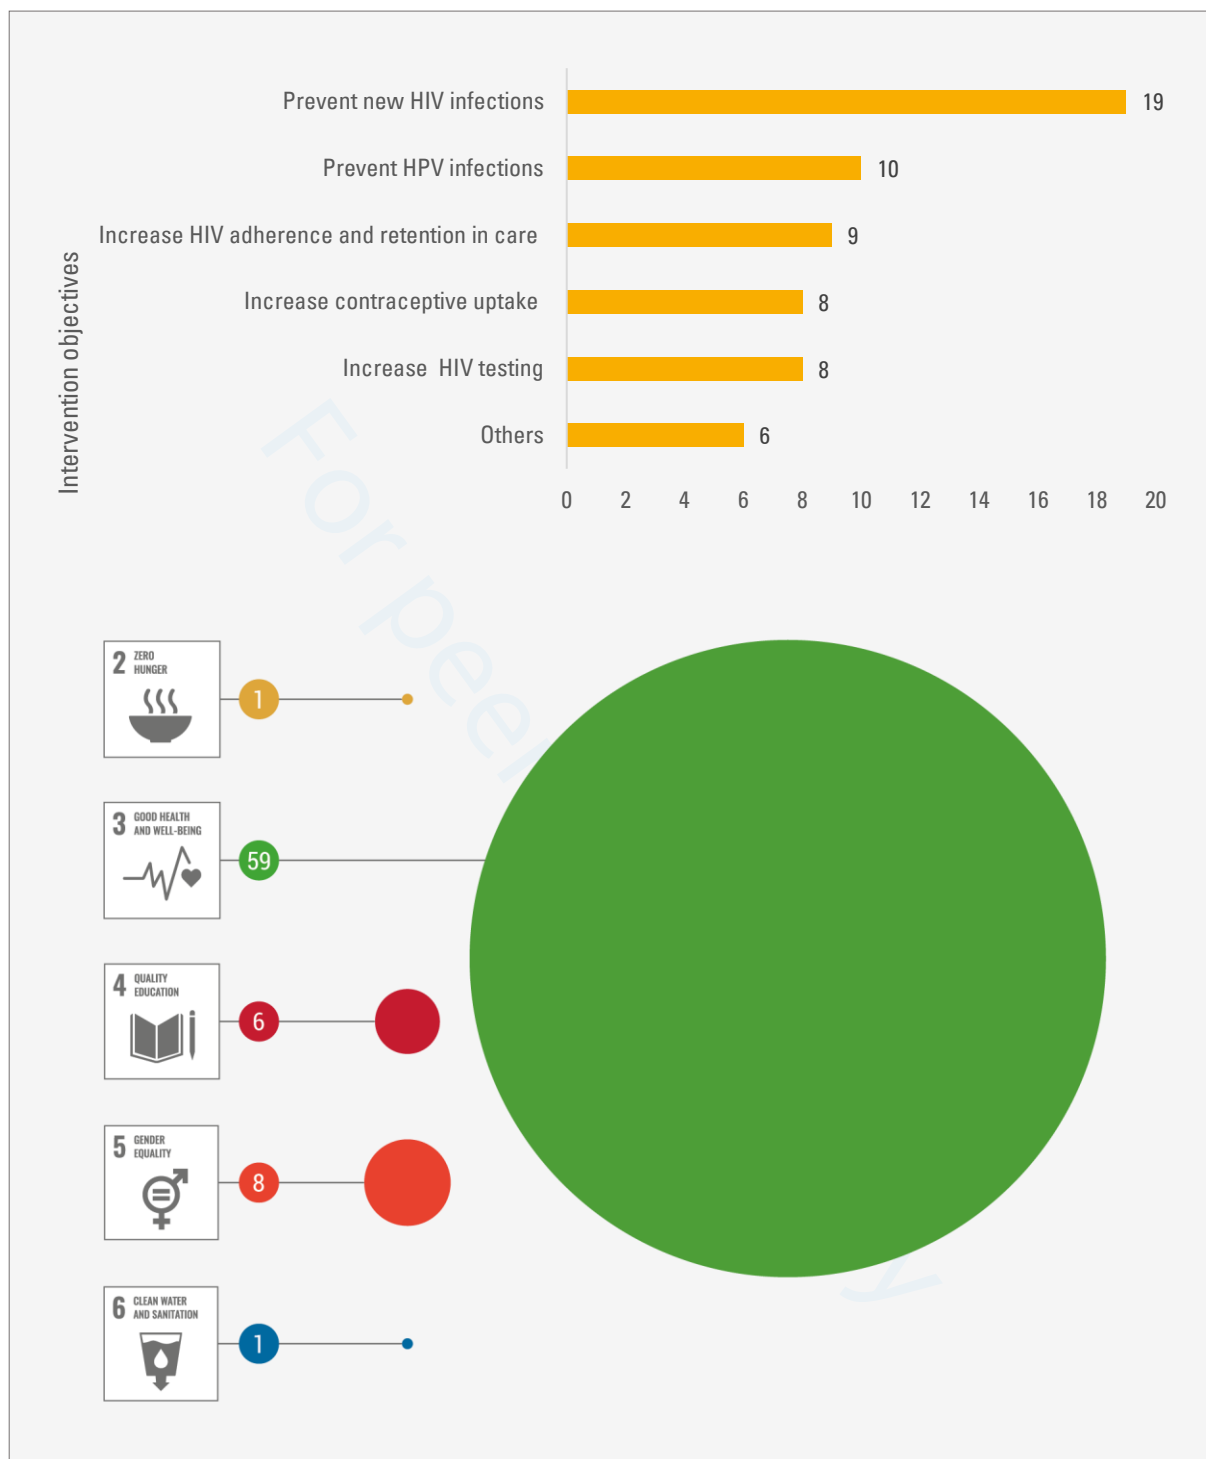

Figure 4: Intervention objectives and number of interventions linked to each SDG

**Table S1. Systematic Review Search Strategy**

|                                                                              |                                                                                                                                                                                                                                                                                                                                                                                                                                                                                                                                                                                                                                                                                                                                                                                                                                                                                                                                                                                                                                                                                                                                                                                                                                                                                                                                                                   |
|------------------------------------------------------------------------------|-------------------------------------------------------------------------------------------------------------------------------------------------------------------------------------------------------------------------------------------------------------------------------------------------------------------------------------------------------------------------------------------------------------------------------------------------------------------------------------------------------------------------------------------------------------------------------------------------------------------------------------------------------------------------------------------------------------------------------------------------------------------------------------------------------------------------------------------------------------------------------------------------------------------------------------------------------------------------------------------------------------------------------------------------------------------------------------------------------------------------------------------------------------------------------------------------------------------------------------------------------------------------------------------------------------------------------------------------------------------|
| <p>Search criteria (based on the Cochrane Collaboration's PICO criteria)</p> | <p><b>Population:</b> adolescents or youth 10–24 years, living in Africa</p> <p><b>Intervention:</b> primary research to determine adolescent and youth acceptability of one or more interventions aimed at improving their developmental outcomes (as per SDG indicators)</p> <p><b>Comparison:</b> N/A</p> <p><b>Outcomes:</b> adolescent acceptability findings, including: proportion of adolescents that find an intervention acceptable; information on what adolescents consider acceptable or not; reasons given for acceptability or lack of acceptability</p> <p><b>Study or intervention design:</b> all types of study designs; no limiters on methodology</p>                                                                                                                                                                                                                                                                                                                                                                                                                                                                                                                                                                                                                                                                                        |
| <p>Search terms used for PubMed</p>                                          | <p>Adolescents or Youth (((youth[Title/Abstract] OR young person[Title/Abstract] OR young people[Title/Abstract] OR young women[Title/Abstract] OR young men[Title/Abstract] OR child*[Title/Abstract] OR adoles*[Title/Abstract] OR young adult[Title/Abstract] OR teen*[Title/Abstract]))</p> <p>Acceptability ((acceptable[Title/Abstract] OR acceptability[Title/Abstract] OR co-creat*[Title/Abstract] OR adolescent engagement[Title/Abstract] OR youth engagement[Title/Abstract] OR teen* engagement[Title/Abstract] OR participant engagement[Title/Abstract] OR adolescent participation[Title/Abstract] OR youth participation[Title/Abstract] OR teen* participation[Title/Abstract] OR participant input[Title/Abstract] OR adolescent input[Title/Abstract] OR youth input[Title/Abstract] OR teen* input[Title/Abstract] OR participant feedback[Title/Abstract] OR adolescent feedback[Title/Abstract] OR youth feedback[Title/Abstract] OR teen* feedback[Title/Abstract] OR participant consultation[Title/Abstract] OR adolescent consultation[Title/Abstract] OR youth consultation[Title/Abstract] OR teen* consultation[Title/Abstract] OR participant advisory[Title/Abstract] OR adolescent advisory[Title/Abstract] OR youth advisory[Title/Abstract] OR teen* advisory[Title/Abstract] OR participatory research)[Title/Abstract]))</p> |

|                                             |                                                                                                                                                                                                                                                                                                                                                                                                                                                                                                                                                                                                                                                                                                                                                                                                                                   |
|---------------------------------------------|-----------------------------------------------------------------------------------------------------------------------------------------------------------------------------------------------------------------------------------------------------------------------------------------------------------------------------------------------------------------------------------------------------------------------------------------------------------------------------------------------------------------------------------------------------------------------------------------------------------------------------------------------------------------------------------------------------------------------------------------------------------------------------------------------------------------------------------|
| Search terms used for Web of Science        | Adolescents of Youth: TOPIC: ((youth OR "young person" OR "young people" OR "young women" OR "young men" OR "child*" OR "adoles*" OR "young adult" OR "teen*")) Acceptability: TOPIC: ((acceptable OR acceptability OR co-creat* OR "adolescent engagement" OR "youth engagement" OR "teen* engagement" OR "participant engagement" OR "adolescent participation" OR "youth participation" OR "teen* participation" OR "participant input" OR "adolescent input" OR "youth input" OR "teen* input" OR "participant feedback" OR "adolescent feedback" OR "youth feedback" OR "teen* feedback" OR "participant consultation" OR "adolescent consultation" OR "youth consultation" OR "teen* consultation" OR "participant advisory" OR "adolescent advisory" OR "youth advisory" OR "teen* advisory" OR "participatory research")) |
| Search terms for EBSCOhost-linked databases | Adolescents or Youth: AB ( youth OR “young person” OR “young people” OR “young women” OR “young men” OR “child*” OR “adoles*” OR “young adult” OR “teen*” )<br>AcceptabilityAB ( acceptable OR acceptability OR co-creat* OR “adolescent engagement” OR “youth engagement” OR “teen* engagement” OR “participant engagement” OR “adolescent participation” OR “youth participation” OR “teen* participation” OR “participant input” OR “adolescent input” OR “youth input” OR “teen* input” OR “participant feedback” OR “adolescent feedback” OR “youth feedback” OR “teen* feedback” OR “participant consultation” OR “adolescent consultation” OR “youth consultation” OR “teen* consultation” OR “participant advisory” OR “adolescent advisory” OR “youth advisory” OR “teen* advisory” OR “participatory research” )        |
| Databases searched                          | Web of Science, Medline, PsychInfo, SocilIndex, CINAHL, Africa-wide, Academic Search Complete and PubMed                                                                                                                                                                                                                                                                                                                                                                                                                                                                                                                                                                                                                                                                                                                          |
| Limiters                                    | <ul style="list-style-type: none"> <li>- Published between 1 January 2010 and 30 June 2020</li> <li>- Peer-reviewed</li> <li>- English language</li> </ul>                                                                                                                                                                                                                                                                                                                                                                                                                                                                                                                                                                                                                                                                        |

| Authors               | Title                                        | Publication year | Country      | Setting           | Sample size | Sample age range | Sample gender | Number of intervention sites | Type of intervention          | Type of intervention (sub-type) | Key objective of intervention | SDGs     | Progressive, consistent or retrospective acceptability | Explicit definition of acceptability | Conceptual framework used for acceptability | Study design     | Method used        | Indicators and questions           | Overall acceptability         | Subdomains that formed the overall acceptability | Other subdomains for whom acceptability was assessed                    |         |
|-----------------------|----------------------------------------------|------------------|--------------|-------------------|-------------|------------------|---------------|------------------------------|-------------------------------|---------------------------------|-------------------------------|----------|--------------------------------------------------------|--------------------------------------|---------------------------------------------|------------------|--------------------|------------------------------------|-------------------------------|--------------------------------------------------|-------------------------------------------------------------------------|---------|
| Angeles et al         | Contexts of vulnerability and the socialised | 2018             | South Africa | Peri-urban        | 14          | 19-17            | Female & Male | 4                            | HIV Vaccine, Contraception    | HIV Vaccine, Vax                | To increase service use       | 1        | Prospective                                            | NA                                   | NA                                          | Qualitative      | ICDs and FGDs      | FGDs and CB interview series       | High                          | NA                                               | Healthcare Workers                                                      |         |
| Ayala et al           | Acceptability and usability of the 2018      | 2019             | Cameroon     | Rural             | 101         | 14-19            | Female        | 1                            | HPV Vaccine                   | HPV Vaccine                     | To increase HPV use           | 3        | Prospective                                            | NA                                   | NA                                          | Quantitative     | Survey             | Survey included quantitative       | High                          | NA                                               | NA                                                                      |         |
| Barber et al          | Acceptability of an economic support cost    | 2019             | Zambia       | Rural             | 95          | NA               | Female & Male | 1                            | Economic support intervention | Cash transfers                  | To increase service use       | 1, 4 & 5 | Prospective                                            | NA                                   | NA                                          | Qualitative      | FGDs and IDIs      | FGDs and IDIs                      | High                          | NA                                               | Community gate keepers                                                  |         |
| Barber et al          | Initial willingness to accept cost for an    | 2019             | Chad         | Not stated        | 10          | 15-19            | Female & Male | 1                            | Support group                 | Support group                   | To increase service use       | 1        | Prospective                                            | NA                                   | NA                                          | Qualitative      | FGDs               | Survey structured FGDs             | High                          | NA                                               | NA                                                                      |         |
| Bell et al            | Cost-Sensitive Usability of Healthcare       | 2019             | Uganda       | Urban             | 15          | NA               | Female & Male | 1                            | Healthcare                    | Incentive Based                 | To increase service use       | 1 & 4    | Consentive                                             | NA                                   | NA                                          | Qualitative      | FGDs               | FGDs covered acceptability of      | High                          | NA                                               | NA                                                                      |         |
| Buato et al           | Acceptability of short-term resources to     | 2016             | Zimbabwe     | Rural & Urban     | 14          | 19-19            | Female & Male | 1                            | Others                        | Home Based Care                 | To increase service use       | 1        | Retrospective                                          | NA                                   | NA                                          | Qualitative      | ICDs               | Focus group included acceptability | High                          | NA                                               | Program managers and providers                                          |         |
| Carver et al          | Acceptability and feasibility of a brief     | 2018             | South Africa | Not stated        | 30          | 19-17            | Female & Male | 1                            | Others                        | Substance use                   | To reduce use of              | 3        | Retrospective                                          | NA                                   | NA                                          | Qualitative      | ICDs               | No question stated and not         | High                          | NA                                               | Caregivers                                                              |         |
| Chakraborty et al     | Acceptability of a mobile health             | 2018             | South Africa | Not stated        | 100         | 19-19            | Female & Male | 1                            | Others                        | SMS based                       | To increase service use       | 3        | Prospective                                            | NA                                   | NA                                          | Qualitative      | Survey             | Survey included structured         | High                          | NA                                               | NA                                                                      |         |
| Chowdhury et al       | Acceptability of youth health                | 2019             | Zambia       | Rural             | 58          | 19-18            | Female & Male | 1                            | School based sexual and       | School based sex                | To increase service use       | 1 & 5    | Retrospective                                          | NA                                   | NA                                          | Qualitative      | FGDs               | Structural FGD middle class        | High                          | NA                                               | Teachers                                                                |         |
| Cover et al           | Acceptability of contraceptive               | 2017             | Uganda       | Rural & Urban     | 60          | 19-19            | Female        | 1                            | Contraception                 | Contraception                   | To increase service use       | 3 & 5    | Retrospective                                          | NA                                   | NA                                          | Qualitative      | ICDs               | ICD structured interview           | High                          | NA                                               | NA                                                                      |         |
| Dahl et al            | Acceptability of Contraception               | 2019             | Nigeria      | Not stated        | 349         | 19-18            | Female & Male | 1                            | Support group                 | Support group                   | To increase service use       | 1        | Consentive                                             | NA                                   | NA                                          | Qualitative      | ICDs through Fac   | Structural FGD middle class        | High                          | NA                                               | NA                                                                      |         |
| Davies et al          | Acceptability of condom                      | 2019             | Zimbabwe     | Rural             | 157         | 19-19            | Female & Male | 1                            | Contraception                 | Condoms                         | To increase service use       | 1        | Prospective                                            | NA                                   | NA                                          | Qualitative      | Survey/Qualitative | Survey asked whether used          | High                          | NA                                               | Family members                                                          |         |
| Ferreira et al        | Perceptions of Risk of Venereal              | 2019             | Zimbabwe     | Urban             | 20          | 19-19            | Female & Male | 1                            | HIV testing                   | Provider-initiated              | To increase service use       | 3        | Prospective                                            | NA                                   | NA                                          | Qualitative      | Survey/Qualitative | Survey covered acceptability       | High                          | NA                                               | NA                                                                      |         |
| Ford et al            | Acceptability of a mobile health             | 2019             | South Africa | Urban             | 30          | 19-19            | Female & Male | 1                            | Others                        | HPV Vaccine                     | To increase service use       | 1        | Prospective                                            | NA                                   | NA                                          | Mixed methods    | Survey/Qualitative | Survey questions included on       | High                          | NA                                               | Clinical service providers                                              |         |
| Hickling et al        | "This one has serious" interventions for     | 2019             | South Africa | Urban             | 30          | 19-19            | Female & Male | 1                            | Contraception                 | Contraception                   | To increase service use       | 1        | Consentive                                             | NA                                   | NA                                          | Qualitative      | Survey/Qualitative | Survey covered acceptability       | High                          | NA                                               | Teachers                                                                |         |
| Hocher et al          | Acceptability and performance of             | 2019             | South Africa | Rural             | 206         | 19-18            | Female & Male | 1                            | HPV testing                   | Self-testing                    | To increase service use       | 3        | Retrospective                                          | NA                                   | NA                                          | Quantitative     | Survey/Qualitative | Post-test questionnaire capture    | High                          | NA                                               | NA                                                                      |         |
| Horowitz et al        | Acceptability, Perceptions and               | 2019             | Uganda       | Urban, semi-urban | 20          | 19-18            | Female & Male | 1                            | School based sexual and       | School based sex                | To increase service use       | 1 & 5    | Retrospective                                          | NA                                   | NA                                          | Qualitative      | Survey/Qualitative | Survey included acceptability      | High                          | NA                                               | Teachers                                                                |         |
| Howe et al            | Human Papillomavirus Vaccination             | 2019             | South Africa | Not stated        | 400         | 19-18            | Female & Male | 1                            | Support group                 | Support group                   | To increase service use       | 1        | Consentive                                             | NA                                   | NA                                          | Qualitative      | ICDs               | No clear acceptability question    | High                          | NA                                               | NA                                                                      |         |
| Jayasinghe et al      | Acceptability of male circumcision           | 2019             | Botswana     | Not stated        | 269         | 19-18            | Male          | 1                            | Other biomedical HPV          | VMMs                            | To increase service use       | 1        | Prospective & NA                                       | NA                                   | NA                                          | Quantitative     | Survey/Qualitative | Structured questionnaire           | High                          | NA                                               | Parents/guardians                                                       |         |
| Kamukama et al        | Acceptability of HPV vaccine                 | 2019             | Uganda       | Urban             | 20          | 19-19            | Female & Male | 1                            | School based sexual and       | School based sex                | To increase service use       | 1        | Consentive                                             | NA                                   | NA                                          | Mixed methods    | FGDs and IDIs      | Specific acceptability question    | High                          | NA                                               | Teachers and parents                                                    |         |
| Katumba et al         | Acceptability of HPV vaccine                 | 2019             | South Africa | Urban             | 20          | 19-19            | Female & Male | 1                            | HPV Vaccine                   | HPV Vaccine                     | To increase service use       | 1        | Retrospective                                          | NA                                   | NA                                          | Qualitative      | FGDs               | FGDs explored reasons for          | High                          | NA                                               | NA                                                                      |         |
| Khalid et al          | A Qualitative Analysis of Factors            | 2019             | South Africa | Urban             | 20          | 19-19            | Female & Male | 1                            | HPV Vaccine                   | HPV Vaccine                     | To increase service use       | 1        | Retrospective                                          | NA                                   | NA                                          | Qualitative      | ICDs               | Interviews covered contextual      | High                          | NA                                               | Caregivers                                                              |         |
| Khan, Zaki and Shuman | Acceptability and feasibility of a school    | 2019             | South Africa | Rural             | 68          | 19-19            | Female        | 1                            | Contraception                 | School based sex                | To increase service use       | 1 & 5    | Prospective                                            | NA                                   | NA                                          | Sociodemographic | Qualitative        | FGDs                               | FGD topic guide asked how use | Low                                              | NA                                                                      | Parents |
| Khuzwayo et al        | Acceptability of a mobile health             | 2018             | South Africa | Urban             | 40          | 19-19            | Female & Male | 1                            | Economic support intervention | Cash transfers                  | To increase service use       | 1        | Consentive                                             | NA                                   | NA                                          | Qualitative      | ICDs               | Interviews focused on topics       | High                          | NA                                               | NA                                                                      |         |
| Kidwell et al         | Acceptability of a Pilot Intervention        | 2018             | Kenya        | Not stated        | 16          | 19-14            | Male          | 1                            | Other biomedical HPV          | VMMs                            | To increase service use       | 1        | Retrospective                                          | NA                                   | NA                                          | Mixed methods    | FGDs and Survey    | The questionnaire covered          | High                          | NA                                               | Community leaders                                                       |         |
| Kiproti et al         | "This is the medicine" A Review              | 2019             | Kenya        | Semi-urban        | 51          | 18-24            | Female & Male | 1                            | Support group                 | Support group                   | To increase service use       | 1        | Consentive                                             | NA                                   | NA                                          | Qualitative      | FGDs               | FGDs explored acceptability        | High                          | NA                                               | NA                                                                      |         |
| Kuo et al             | Acceptability, Feasibility, and              | 2019             | South Africa | Urban             | 71          | 19-15            | Female & Male | 1                            | Support group                 | Support group                   | To reduce HIV risk            | 3        | Retrospective                                          | NA                                   | NA                                          | Qualitative      | Focus groups       | Participants asked intervention    | High                          | NA                                               | Parents                                                                 |         |
| Kuznetsov et al       | Acceptability, Feasibility, and              | 2019             | South Africa | Urban             | 24          | 19-14            | Female & Male | 1                            | Support group                 | Support group                   | To increase health            | 3        | Prospective                                            | NA                                   | NA                                          | Qualitative      | FGDs               | FGDs explored acceptability        | High                          | NA                                               | Community leaders                                                       |         |
| Ladell et al          | A Randomised controlled trial of             | 2019             | South Africa | Rural             | 29          | 18-17            | Female        | 1                            | Economic support intervention | Cash transfers                  | To increase service use       | 1        | Consentive                                             | NA                                   | NA                                          | Qualitative      | FGDs and Survey    | FGDs covered whether started       | High                          | NA                                               | Providers, coordinators, pharmacist, client rep, and study coordinators |         |
| Madhavi et al         | Acceptability and feasibility of             | 2017             | South Africa | Rural & Urban     | 214         | 19-19            | Female & Male | 1                            | HIV testing                   | School based                    | To increase service use       | 1        | Prospective                                            | NA                                   | NA                                          | Quantitative     | Survey/Qualitative | Questionnaire included a           | High                          | NA                                               | NA                                                                      |         |
| Maheshwari et al      | Acceptability and feasibility of             | 2019             | Zimbabwe     | Not stated        | 468         | 19-17            | Male          | 1                            | Other biomedical HPV          | VMMs                            | To increase service use       | 1        | Retrospective                                          | NA                                   | NA                                          | Quantitative     | Survey/Qualitative | Questionnaire                      | High                          | NA                                               | NA                                                                      |         |
| Milum et al           | Knowledge of Cervical Cancer                 | 2019             | Uganda       | Not stated        | 108         | 18-18            | Female & Male | 1                            | HPV Vaccine, Cervical cancer  | HPV Vaccine                     | To increase HPV use           | 3        | Prospective & NA                                       | NA                                   | NA                                          | Quantitative     | Survey/Qualitative | Questionnaire                      | High                          | NA                                               | NA                                                                      |         |
| Mitsuru et al         | Cell phone usage among adolescents           | 2019             | Uganda       | Not stated        | 200         | 19-19            | Female & Male | 1                            | Others                        | SMS based                       | To increase service use       | 1        | Prospective                                            | NA                                   | NA                                          | Qualitative      | Survey/Qualitative | Survey included acceptability      | High                          | NA                                               | NA                                                                      |         |
| Nawar et al           | Adherence to non-sterile                     | 2019             | Senegal      | Not stated        | 80          | 18-18            | Female & Male | 1                            | Others                        | Nutrition/HPV                   | To reduce maternal            | 3        | Consentive                                             | NA                                   | NA                                          | Mixed methods    | FGDs and survey    | The structured questionnaire       | High                          | NA                                               | Caregivers                                                              |         |
| Ndlovu et al          | Acceptability and feasibility of             | 2019             | South Africa | Rural             | 14          | 18-14            | Female        | 1                            | Economic support intervention | Cash transfers                  | To increase service use       | 1        | Consentive                                             | NA                                   | NA                                          | Qualitative      | Survey/Qualitative | Survey assessed willingness        | High                          | NA                                               | NA                                                                      |         |
| Ndlovu et al          | Acceptability and feasibility of             | 2019             | South Africa | Rural & Urban     | 214         | 19-19            | Female & Male | 1                            | HIV testing                   | School based                    | To increase service use       | 1        | Prospective                                            | NA                                   | NA                                          | Quantitative     | Survey/Qualitative | Questionnaire included             | High                          | NA                                               | Facilitators                                                            |         |
| Ndlovu et al          | Acceptability and feasibility of             | 2019             | South Africa | Rural             | 29          | 18-17            | Female        | 1                            | Economic support intervention | Cash transfers                  | To increase service use       | 1        | Consentive                                             | NA                                   | NA                                          | Qualitative      | FGDs and Survey    | FGDs covered whether started       | High                          | NA                                               | Providers, coordinators, pharmacist, client rep, and study coordinators |         |
| Ndlovu et al          | Acceptability and feasibility of             | 2019             | South Africa | Rural & Urban     | 214         | 19-19            | Female & Male | 1                            | HIV testing                   | School based                    | To increase service use       | 1        | Prospective                                            | NA                                   | NA                                          | Quantitative     | Survey/Qualitative | Questionnaire included             | High                          | NA                                               | Facilitators                                                            |         |
| Ndlovu et al          | Acceptability and feasibility of             | 2019             | South Africa | Rural             | 29          | 18-17            | Female        | 1                            | Economic support intervention | Cash transfers                  | To increase service use       | 1        | Consentive                                             | NA                                   | NA                                          | Qualitative      | FGDs and Survey    | FGDs covered whether started       | High                          | NA                                               | Providers, coordinators, pharmacist, client rep, and study coordinators |         |
| Ndlovu et al          | Acceptability and feasibility of             | 2019             | South Africa | Rural & Urban     | 214         | 19-19            | Female & Male | 1                            | HIV testing                   | School based                    | To increase service use       | 1        | Prospective                                            | NA                                   | NA                                          | Quantitative     | Survey/Qualitative | Questionnaire included             | High                          | NA                                               | Facilitators                                                            |         |
| Ndlovu et al          | Acceptability and feasibility of             | 2019             | South Africa | Rural             | 29          | 18-17            | Female        | 1                            | Economic support intervention | Cash transfers                  | To increase service use       | 1        | Consentive                                             | NA                                   | NA                                          | Qualitative      | FGDs and Survey    | FGDs covered whether started       | High                          | NA                                               | Providers, coordinators, pharmacist, client rep, and study coordinators |         |
| Ndlovu et al          | Acceptability and feasibility of             | 2019             | South Africa | Rural & Urban     | 214         | 19-19            | Female & Male | 1                            | HIV testing                   | School based                    | To increase service use       | 1        | Prospective                                            | NA                                   | NA                                          | Quantitative     | Survey/Qualitative | Questionnaire included             | High                          | NA                                               | Facilitators                                                            |         |
| Ndlovu et al          | Acceptability and feasibility of             | 2019             | South Africa | Rural             | 29          | 18-17            | Female        | 1                            | Economic support intervention | Cash transfers                  | To increase service use       | 1        | Consentive                                             | NA                                   | NA                                          | Qualitative      | FGDs and Survey    | FGDs covered whether started       | High                          | NA                                               | Providers, coordinators, pharmacist, client rep, and study coordinators |         |
| Ndlovu et al          | Acceptability and feasibility of             | 2019             | South Africa | Rural & Urban     | 214         | 19-19            | Female & Male | 1                            | HIV testing                   | School based                    | To increase service use       | 1        | Prospective                                            | NA                                   | NA                                          | Quantitative     | Survey/Qualitative | Questionnaire included             | High                          | NA                                               | Facilitators                                                            |         |
| Ndlovu et al          | Acceptability and feasibility of             | 2019             | South Africa | Rural             | 29          | 18-17            | Female        | 1                            | Economic support intervention | Cash transfers                  | To increase service use       | 1        | Consentive                                             | NA                                   | NA                                          | Qualitative      | FGDs and Survey    | FGDs covered whether started       | High                          | NA                                               | Providers, coordinators, pharmacist, client rep, and study coordinators |         |
| Ndlovu et al          | Acceptability and feasibility of             | 2019             | South Africa | Rural & Urban     | 214         | 19-19            | Female & Male | 1                            | HIV testing                   | School based                    | To increase service use       | 1        | Prospective                                            | NA                                   | NA                                          | Quantitative     | Survey/Qualitative | Questionnaire included             | High                          | NA                                               | Facilitators                                                            |         |
| Ndlovu et al          | Acceptability and feasibility of             | 2019             | South Africa | Rural             | 29          | 18-17            | Female        | 1                            | Economic support intervention | Cash transfers                  | To increase service use       | 1        | Consentive                                             | NA                                   | NA                                          | Qualitative      | FGDs and Survey    | FGDs covered whether started       | High                          | NA                                               | Providers, coordinators, pharmacist, client rep, and study coordinators |         |
| Ndlovu et al          | Acceptability and feasibility of             | 2019             | South Africa | Rural & Urban     | 214         | 19-19            | Female & Male | 1                            | HIV testing                   | School based                    | To increase service use       | 1        | Prospective                                            | NA                                   | NA                                          | Quantitative     | Survey/Qualitative | Questionnaire included             | High                          | NA                                               | Facilitators                                                            |         |
| Ndlovu et al          | Acceptability and feasibility of             | 2019             | South Africa | Rural             | 29          | 18-17            | Female        | 1                            | Economic support intervention | Cash transfers                  | To increase service use       | 1        | Consentive                                             | NA                                   | NA                                          | Qualitative      | FGDs and Survey    | FGDs covered whether started       | High                          | NA                                               | Providers, coordinators, pharmacist, client rep, and study coordinators |         |
| Ndlovu et al          | Acceptability and feasibility of             | 2019             | South Africa | Rural & Urban     | 214         | 19-19            | Female & Male | 1                            | HIV testing                   | School based                    | To increase service use       | 1        | Prospective                                            | NA                                   | NA                                          | Quantitative     | Survey/Qualitative | Questionnaire included             | High                          | NA                                               | Facilitators                                                            |         |
| Ndlovu et al          | Acceptability and feasibility of             | 2019             | South Africa | Rural             | 29          | 18-17            | Female        | 1                            | Economic support intervention | Cash transfers                  | To increase service use       | 1        | Consentive                                             | NA                                   | NA                                          | Qualitative      | FGDs and Survey    | FGDs covered whether started       | High                          | NA                                               | Providers, coordinators, pharmacist, client rep, and study coordinators |         |
| Ndlovu et al          | Acceptability and feasibility of             | 2019             | South Africa | Rural & Urban     | 214         | 19-19            | Female & Male | 1                            | HIV testing                   | School based                    | To increase service use       | 1        | Prospective                                            | NA                                   | NA                                          | Quantitative     | Survey/Qualitative | Questionnaire included             | High                          | NA                                               | Facilitators                                                            |         |
| Ndlovu et al          | Acceptability and feasibility of             | 2019             | South Africa | Rural             | 29          | 18-17            | Female        | 1                            | Economic support intervention | Cash transfers                  | To increase service use       | 1        | Consentive                                             | NA                                   | NA                                          | Qualitative      | FGDs and Survey    | FGDs covered whether started       | High                          | NA                                               | Providers, coordinators, pharmacist, client rep, and study coordinators |         |
| Ndlovu et al          | Acceptability and feasibility of             | 2019             | South Africa | Rural & Urban     | 214         | 19-19            | Female & Male | 1                            | HIV testing                   | School based                    | To increase service use       | 1        | Prospective                                            | NA                                   | NA                                          | Quantitative     | Survey/Qualitative | Questionnaire included             | High                          | NA                                               | Facilitators                                                            |         |
| Ndlovu et al          | Acceptability and feasibility of             | 2019             | South Africa | Rural             | 29          | 18-17            | Female        | 1                            | Economic support intervention | Cash transfers                  | To increase service use       | 1        | Consentive                                             | NA                                   | NA                                          | Qualitative      | FGDs and Survey    | FGDs covered whether started       | High                          | NA                                               | Providers, coordinators, pharmacist, client rep, and study coordinators |         |
| Ndlovu et al          | Acceptability and feasibility of             | 2019             | South Africa | Rural & Urban     | 214         | 19-19            | Female & Male | 1                            | HIV testing                   | School based                    | To increase service use       | 1        | Prospective                                            | NA                                   | NA                                          | Quantitative     | Survey/Qualitative | Questionnaire included             | High                          | NA                                               | Facilitators                                                            |         |
| Ndlovu et al          | Acceptability and feasibility of             | 2019             | South Africa | Rural             | 29          | 18-17            | Female        | 1                            | Economic support intervention | Cash transfers                  | To increase service use       | 1        | Consentive                                             | NA                                   | NA                                          | Qualitative      | FGDs and Survey    | FGDs covered whether started       | High                          | NA                                               | Providers, coordinators, pharmacist, client rep, and study coordinators |         |
| Ndlovu et al          | Acceptability and feasibility of             | 2019             | South Africa | Rural & Urban     | 214         | 19-19            | Female & Male | 1                            | HIV testing                   | School based                    | To increase service use       | 1        | Prospective                                            | NA                                   | NA                                          | Quantitative     | Survey/Qualitative | Questionnaire included             | High                          | NA                                               | Facilitators                                                            |         |
| Ndlovu et al          | Acceptability and feasibility of             | 2019             | South Africa | Rural             | 29          | 18-17            | Female        | 1                            | Economic support intervention | Cash transfers                  | To increase service use       | 1        | Consentive                                             | NA                                   | NA                                          | Qualitative      | FGDs and Survey    | FGDs covered whether started       | High                          | NA                                               | Providers, coordinators, pharmacist, client rep, and study coordinators |         |
| Ndlovu et al          | Acceptability and feasibility of             | 2019             | South Africa | Rural & Urban     | 214         | 19-19            | Female & Male | 1                            | HIV testing                   | School based                    | To increase service use       | 1        | Prospective                                            | NA                                   | NA                                          | Quantitative     | Survey/Qualitative | Questionnaire included             | High                          | NA                                               | Facilitators                                                            |         |
| Ndlovu et al          | Acceptability and feasibility of             |                  |              |                   |             |                  |               |                              |                               |                                 |                               |          |                                                        |                                      |                                             |                  |                    |                                    |                               |                                                  |                                                                         |         |



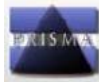

## PRISMA 2020 Checklist

| Section and Topic             | Item # | Checklist item                                                                                                                                                                                                                                                                                       | Location where item is reported |
|-------------------------------|--------|------------------------------------------------------------------------------------------------------------------------------------------------------------------------------------------------------------------------------------------------------------------------------------------------------|---------------------------------|
| <b>TITLE</b>                  |        |                                                                                                                                                                                                                                                                                                      |                                 |
| Title                         | 1      | Identify the report as a systematic review.                                                                                                                                                                                                                                                          | Pg. 1                           |
| <b>ABSTRACT</b>               |        |                                                                                                                                                                                                                                                                                                      |                                 |
| Abstract                      | 2      | See the PRISMA 2020 for Abstracts checklist.                                                                                                                                                                                                                                                         | Pg. 2                           |
| <b>INTRODUCTION</b>           |        |                                                                                                                                                                                                                                                                                                      |                                 |
| Rationale                     | 3      | Describe the rationale for the review in the context of existing knowledge.                                                                                                                                                                                                                          | Pg. 5                           |
| Objectives                    | 4      | Provide an explicit statement of the objective(s) or question(s) the review addresses.                                                                                                                                                                                                               | Pg. 5                           |
| <b>METHODS</b>                |        |                                                                                                                                                                                                                                                                                                      |                                 |
| Eligibility criteria          | 5      | Specify the inclusion and exclusion criteria for the review and how studies were grouped for the syntheses.                                                                                                                                                                                          | Pg. 5,6                         |
| Information sources           | 6      | Specify all databases, registers, websites, organisations, reference lists and other sources searched or consulted to identify studies. Specify the date when each source was last searched or consulted.                                                                                            | Pg. 6                           |
| Search strategy               | 7      | Present the full search strategies for all databases, registers and websites, including any filters and limits used.                                                                                                                                                                                 | Table S1                        |
| Selection process             | 8      | Specify the methods used to decide whether a study met the inclusion criteria of the review, including how many reviewers screened each record and each report retrieved, whether they worked independently, and if applicable, details of automation tools used in the process.                     | Pg. 6                           |
| Data collection process       | 9      | Specify the methods used to collect data from reports, including how many reviewers collected data from each report, whether they worked independently, any processes for obtaining or confirming data from study investigators, and if applicable, details of automation tools used in the process. | Pg. 6                           |
| Data items                    | 10a    | List and define all outcomes for which data were sought. Specify whether all results that were compatible with each outcome domain in each study were sought (e.g. for all measures, time points, analyses), and if not, the methods used to decide which results to collect.                        | NA                              |
|                               | 10b    | List and define all other variables for which data were sought (e.g. participant and intervention characteristics, funding sources). Describe any assumptions made about any missing or unclear information.                                                                                         | NA                              |
| Study risk of bias assessment | 11     | Specify the methods used to assess risk of bias in the included studies, including details of the tool(s) used, how many reviewers assessed each study and whether they worked independently, and if applicable, details of automation tools used in the process.                                    | NA                              |
| Effect measures               | 12     | Specify for each outcome the effect measure(s) (e.g. risk ratio, mean difference) used in the synthesis or presentation of results.                                                                                                                                                                  | NA                              |
| Synthesis methods             | 13a    | Describe the processes used to decide which studies were eligible for each synthesis (e.g. tabulating the study intervention characteristics and comparing against the planned groups for each synthesis (item #5)).                                                                                 | Pg. 6                           |
|                               | 13b    | Describe any methods required to prepare the data for presentation or synthesis, such as handling of missing summary statistics, or data conversions.                                                                                                                                                | NA                              |
|                               | 13c    | Describe any methods used to tabulate or visually display results of individual studies and syntheses.                                                                                                                                                                                               | NA                              |
|                               | 13d    | Describe any methods used to synthesize results and provide a rationale for the choice(s). If meta-analysis was performed, describe the model(s), method(s) to identify the presence and extent of statistical heterogeneity, and software package(s) used.                                          | NA                              |
|                               | 13e    | Describe any methods used to explore possible causes of heterogeneity among study results (e.g. subgroup analysis, meta-regression).                                                                                                                                                                 | NA                              |
|                               | 13f    | Describe any sensitivity analyses conducted to assess robustness of the synthesized results.                                                                                                                                                                                                         | NA                              |
| Reporting bias assessment     | 14     | Describe any methods used to assess risk of bias due to missing results in a synthesis (arising from reporting biases).                                                                                                                                                                              | NA                              |
| Certainty                     | 15     | Describe any methods used to assess certainty (or confidence) in the body of evidence for an outcome.                                                                                                                                                                                                | NA                              |

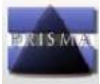

## PRISMA 2020 Checklist

| Section and Topic                              | Item # | Checklist item                                                                                                                                                                                                                                                                       | Location where item is reported |
|------------------------------------------------|--------|--------------------------------------------------------------------------------------------------------------------------------------------------------------------------------------------------------------------------------------------------------------------------------------|---------------------------------|
| assessment                                     |        |                                                                                                                                                                                                                                                                                      |                                 |
| <b>RESULTS</b>                                 |        |                                                                                                                                                                                                                                                                                      |                                 |
| Study selection                                | 16a    | Describe the results of the search and selection process, from the number of records identified in the search to the number of studies included in the review, ideally using a flow diagram.                                                                                         | Pg. 6                           |
|                                                | 16b    | Cite studies that might appear to meet the inclusion criteria, but which were excluded, and explain why they were excluded.                                                                                                                                                          | NA                              |
| Study characteristics                          | 17     | Cite each included study and present its characteristics.                                                                                                                                                                                                                            | Pg. 7                           |
| Risk of bias in studies                        | 18     | Present assessments of risk of bias for each included study.                                                                                                                                                                                                                         | NA                              |
| Results of individual studies                  | 19     | For all outcomes, present, for each study: (a) summary statistics for each group (where appropriate) and (b) an effect estimate and its precision (e.g. confidence/credible interval), ideally using structured tables or plots.                                                     | NA                              |
| Results of syntheses                           | 20a    | For each synthesis, briefly summarise the characteristics and risk of bias among contributing studies.                                                                                                                                                                               | NA                              |
|                                                | 20b    | Present results of all statistical syntheses conducted. If meta-analysis was done, present for each the summary estimate and its precision (e.g. confidence/credible interval) and measures of statistical heterogeneity. If comparing groups, describe the direction of the effect. | NA                              |
|                                                | 20c    | Present results of all investigations of possible causes of heterogeneity among study results.                                                                                                                                                                                       | NA                              |
|                                                | 20d    | Present results of all sensitivity analyses conducted to assess the robustness of the synthesized results.                                                                                                                                                                           | NA                              |
| Reporting biases                               | 21     | Present assessments of risk of bias due to missing results (arising from reporting biases) for each synthesis assessed.                                                                                                                                                              | NA                              |
| Certainty of evidence                          | 22     | Present assessments of certainty (or confidence) in the body of evidence for each outcome assessed.                                                                                                                                                                                  | NA                              |
| <b>DISCUSSION</b>                              |        |                                                                                                                                                                                                                                                                                      |                                 |
| Discussion                                     | 23a    | Provide a general interpretation of the results in the context of other evidence.                                                                                                                                                                                                    | Pg. 11                          |
|                                                | 23b    | Discuss any limitations of the evidence included in the review.                                                                                                                                                                                                                      | Pg. 13                          |
|                                                | 23c    | Discuss any limitations of the review processes used.                                                                                                                                                                                                                                | Pg. 13                          |
|                                                | 23d    | Discuss implications of the results for practice, policy, and future research.                                                                                                                                                                                                       | Pg. 13-14                       |
| <b>OTHER INFORMATION</b>                       |        |                                                                                                                                                                                                                                                                                      |                                 |
| Support                                        | 25     | Describe sources of financial or non-financial support for the review, and the role of the funders or sponsors in the review.                                                                                                                                                        | Pg. 15                          |
| Competing interests                            | 26     | Declare any competing interests of review authors.                                                                                                                                                                                                                                   | Pg. 15                          |
| Availability of data, code and other materials | 27     | Report which of the following are publicly available and where they can be found: template data collection forms; data extracted from included studies; data used for all analyses; analytic code; any other materials used in the review.                                           | NA                              |

# BMJ Open

## A decade of research into the acceptability of interventions aimed at improving adolescent and youth health and social outcomes in Africa: a systematic review and evidence map

|                                 |                                                                                                                                                                                                                                                                                                                                                                                                                             |
|---------------------------------|-----------------------------------------------------------------------------------------------------------------------------------------------------------------------------------------------------------------------------------------------------------------------------------------------------------------------------------------------------------------------------------------------------------------------------|
| Journal:                        | <i>BMJ Open</i>                                                                                                                                                                                                                                                                                                                                                                                                             |
| Manuscript ID                   | bmjopen-2021-055160.R1                                                                                                                                                                                                                                                                                                                                                                                                      |
| Article Type:                   | Original research                                                                                                                                                                                                                                                                                                                                                                                                           |
| Date Submitted by the Author:   | 16-Oct-2021                                                                                                                                                                                                                                                                                                                                                                                                                 |
| Complete List of Authors:       | Somefun, Oluwaseyi; University of the Western Cape, School of Public Health<br>Casale, Marisa; University of the Western Cape, School of Public Health<br>Hauptronnie, Genevieve; University of Cape Town<br>Desmond, Chris; University of KwaZulu-Natal<br>Cluver, Lucie; University of Oxford, Department of Social Policy and Social Work<br>Sherr, Lorraine; University College London., Clinical and Health Psychology |
| <b>Primary Subject Heading</b>: | Health policy                                                                                                                                                                                                                                                                                                                                                                                                               |
| Secondary Subject Heading:      | Evidence based practice, Global health, Health policy, Public health                                                                                                                                                                                                                                                                                                                                                        |
| Keywords:                       | PUBLIC HEALTH, Demography < TROPICAL MEDICINE, Infectious disease/HIV < NEUROLOGY                                                                                                                                                                                                                                                                                                                                           |
|                                 |                                                                                                                                                                                                                                                                                                                                                                                                                             |

SCHOLARONE™  
Manuscripts

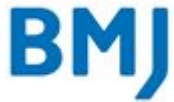

I, the Submitting Author has the right to grant and does grant on behalf of all authors of the Work (as defined in the below author licence), an exclusive licence and/or a non-exclusive licence for contributions from authors who are: i) UK Crown employees; ii) where BMJ has agreed a CC-BY licence shall apply, and/or iii) in accordance with the terms applicable for US Federal Government officers or employees acting as part of their official duties; on a worldwide, perpetual, irrevocable, royalty-free basis to BMJ Publishing Group Ltd ("BMJ") its licensees and where the relevant Journal is co-owned by BMJ to the co-owners of the Journal, to publish the Work in this journal and any other BMJ products and to exploit all rights, as set out in our [licence](#).

The Submitting Author accepts and understands that any supply made under these terms is made by BMJ to the Submitting Author unless you are acting as an employee on behalf of your employer or a postgraduate student of an affiliated institution which is paying any applicable article publishing charge ("APC") for Open Access articles. Where the Submitting Author wishes to make the Work available on an Open Access basis (and intends to pay the relevant APC), the terms of reuse of such Open Access shall be governed by a Creative Commons licence – details of these licences and which [Creative Commons](#) licence will apply to this Work are set out in our licence referred to above.

Other than as permitted in any relevant BMJ Author's Self Archiving Policies, I confirm this Work has not been accepted for publication elsewhere, is not being considered for publication elsewhere and does not duplicate material already published. I confirm all authors consent to publication of this Work and authorise the granting of this licence.

1  
2  
3  
4  
5  
6  
7  
8  
9  
10  
11  
12  
13  
14  
15  
16  
17  
18  
19  
20  
21  
22  
23  
24  
25  
26  
27  
28  
29  
30  
31  
32  
33  
34  
35  
36  
37  
38  
39  
40  
41  
42  
43  
44  
45  
46  
47  
48  
49  
50  
51  
52  
53  
54  
55  
56  
57  
58  
59  
60

## **A decade of research into the acceptability of interventions aimed at improving adolescent and youth health and social outcomes in Africa: a systematic review and evidence map**

*Oluwaseyi Somefun<sup>1</sup>, Marisa Casale<sup>1,2</sup>, Genevieve Haupt Ronnie<sup>3</sup>, Chris Desmond<sup>4</sup>, Lucie Cluver<sup>2,5</sup>, Lorraine Sherr<sup>6</sup>*

<sup>1</sup>UKRI GCRF Accelerating Achievement for Africa's Adolescents, School of Public Health, University of the Western Cape, Cape Town, South Africa

<sup>2</sup>Department of Social Policy and Intervention, University of Oxford, Barnett House, Oxford, United Kingdom

<sup>3</sup>Centre for Social Science Research, University of Cape Town

<sup>4</sup>Centre for Rural Health, University of KwaZulu-Natal

<sup>5</sup> Dept of Psychiatry and Mental Health, University of Cape Town

<sup>6</sup>University College London: London, England, GB

Correspondence: [seyi.somefun@gmail.com](mailto:seyi.somefun@gmail.com)

## Abstract

### Objective

Interventions aimed at improving adolescent health and social outcomes are more likely to be successful if the young people they target find them acceptable. However, no standard definitions or indicators exist to assess acceptability, acceptability research with adolescents in LMICs is still limited, and no known reviews synthesise the evidence from Africa. This paper maps and qualitatively synthesizes the scope, characteristics, and findings of these studies, including definitions of acceptability, methods used, the type and objectives of interventions assessed, and overall findings on adolescent acceptability.

### Design

We conducted a systematic review of peer-reviewed studies assessing intervention acceptability with young adults (aged 10-24) in Africa, published between January 2010 and June 2020.

### Data sources

Web of Science, Medline, PsychInfo, SociIndex, CINAHL, Africa-wide, Academic Search Complete and PubMed were searched through July 2020

### Eligibility criteria for selecting studies

Papers were selected based on the following inclusion criteria: if they (i) reported primary research assessing acceptability (based on the authors' definition of the study or findings) of one or more intervention(s) with adolescents and young adults 10-24; (ii) assessed acceptability of intervention(s) aimed at positively influencing one or more development outcome(s), as defined by SDG indicators; (iii) reported on research conducted in Africa; (iv) were in the English Language; (v) were peer-reviewed and; (vi) were published between 1st January 2010 and 30th June 2020.

### Data extraction and synthesis

Abstracts were reviewed independently by the two first authors to determine relevance. Full text of potentially eligible studies were retrieved and independently examined by the same two authors; areas of disagreement or lack of clarity were resolved through discussion by the two authors and – where necessary – the assessment of a third author.

### Results

55 studies were considered eligible for inclusion in the review. Most studies were conducted in Southern Africa, of which 32 jointly in South Africa and Uganda. The majority of interventions assessed for acceptability could be classified as HIV or HPV vaccine interventions (10), E-health (10), HIV testing interventions (8), support group interventions (7) and contraceptive interventions (6). The objectives of most interventions were linked to SDG3, specifically to HIV and sexual and reproductive health. Acceptability was overall high among these published studies. 22 studies provided reasons for acceptability or lack

1  
2  
3 thereof, some specific to particular types of interventions and others common across  
4 intervention types.  
5

## 6 **Conclusions**

7  
8 Our review exposes considerable scope for future acceptability research and review work.  
9 This should include extending acceptability research beyond the health (and particularly  
10 HIV) sector and to regions in Africa where this type of research is still scarce; including  
11 adolescents earlier, and potentially throughout the intervention process; further  
12 conceptualising the construct of acceptability among adolescents and beyond; and  
13 examining the relationship between acceptability and uptake.  
14  
15  
16  
17  
18

19 **Key words: acceptability; adolescents; youth; interventions; Africa**

## 20 **Strengths and limitations of this study**

- 21  
22  
23  
24  
25
  - This systematic review was carried out in line with the Preferred Reporting Items  
26 for Systematic Reviews and Meta-Analyses (PRISMA)
  - Our search strategy and composite search strings were sufficiently broad in  
27 scope to include studies assessing all types of interventions aimed at improving  
28 health and other social outcomes among adolescents and youth in Africa
  - Screening of study abstracts and full text, as well as data extraction, were  
29 conducted independently by at least 2 authors
  - Our review did not include studies conducted before 2010.
  - The review did not include a quality assessment given the diversity of study  
30 designs, though we note this is not a prerequisite for a mapping review

31  
32  
33  
34  
35  
36  
37  
38  
39  
40  
41  
42  
43  
44  
45  
46  
47  
48  
49  
50  
51  
52  
53  
54  
55  
56  
57  
58  
59  
60



## Introduction

Addressing the developmental needs of adolescents and youth in African countries is critical if the continent is to achieve its sustainable development goals (SDGs), and envisaged transformation articulated in the African Union's overarching Agenda 2063 (1, 2). Adolescents make up the largest generation of their age group in history (3), and Sub-Saharan Africa (SSA) accounts for over 20% of the estimated 1.8 billion adolescents and young adults globally (4). Investing in adolescent wellbeing can have positive effects for individuals during adolescence and beyond, as well as potential positive societal effects. Interventions that reduce the consequences of poverty among adolescents, or lead to more positive behaviours, can influence development and wellbeing during adolescence and throughout the life course (5-7). Investment during adolescence can strengthen early childhood investments and reduce the burden of morbidity and mortality in adulthood (8). Moreover, it has been argued that investment in adolescents can help realize the 'demographic dividend' (9, 10), and reduce generational inequalities (11).

Substantial investment has been made globally in adolescent interventions. These have focused on areas such as sexual and reproductive health, nutrition, uptake of vaccines and prevention of substance abuse (12). Unfortunately these interventions have not always recorded impressive impact (13). Data from both high-income countries (HICs) and low- and middle-income countries (LMICs) reveal that many interventions focusing on adolescents are fragmented, poorly designed, and unequal in quality (14). One reason for this may be an insufficient understanding of the particular nature of adolescence (15).

Adolescence is a critical period characterised by rapid development of the physical, cognitive, social, and emotional capabilities that are instrumental across their life-course (3). Adolescence is also a time of gathering independence. Pathways to learning and experiencing such independence are varied, with experiential learning playing a key role. The rapid growth associated with this phase and its influences on behaviour need to be well understood in order to design timely and effective interventions (16).

Interventions may also fail to sufficiently consider the diverse environments in which adolescents live, that may shape their decisions and behaviour (17). This could lead to interveners missing important factors that, if unaddressed, will prevent the intervention from having the desired impact. Additionally, program implementers may lack the specialized skills necessary for delivering and sustaining these interventions (12). Adult interventions may not translate directly for adolescent audiences and programme adjustments may be inadequate.

Since most interventions seek to effect adolescent behavioural change, many of the obstacles to uptake and effectiveness could be addressed by affording sufficient importance to the perspectives and participation of adolescents themselves. When adolescents feel coerced to engage in a particular behaviour or accept interventions that they don't identify with, they are more likely to resist the message of the proposed intervention, or to stop participating altogether (18). Instead, interventions that are



1  
2  
3 acceptable to adolescent end-users are likely to have higher social validity (19), uptake  
4 and effectiveness (20, 21).  
5

6  
7 However, adolescent involvement and input in intervention design has been varied, and  
8 models of adolescent inclusion have been poorly envisaged and implemented. There is  
9 still a relatively low number of acceptability studies among adolescents in LMICs and  
10 specifically in Africa, particularly beyond the health sector (19, 20). To our knowledge no  
11 existing reviews comprehensively map the extant body of acceptability research in Africa  
12 and aggregate the evidence emerging from these studies. Furthermore, there is no clear  
13 and standard definition of acceptability (20) in Africa and beyond. This in turn raises  
14 several methodological challenges when setting out to assess acceptability, including the  
15 choice of measurement frameworks and tools (20). It also highlights the scope for  
16 further conceptualisation of this construct, particularly in specific populations and  
17 geographical regions.  
18  
19  
20

21 We conducted a systematic review to identify studies that conducted primary research  
22 with adolescents and young adults (10-24) in Africa over the past decade (January 2010-  
23 June 2020), to assess the acceptability of interventions aimed at positively influencing  
24 their developmental outcomes. This paper maps and qualitatively synthesizes the scope,  
25 characteristics, and overall findings of studies identified. This includes evidence  
26 addressing the questions of whether and how the construct of acceptability is  
27 conceptualised and defined within these studies, the methods and indicators used, the  
28 type and key objectives of interventions assessed, as well as evidence on what  
29 adolescents find acceptable and why. Based on these findings, we aim to discuss  
30 implications for future adolescent-focused interventions in Africa and identify gaps for  
31 future acceptability research with this population.  
32  
33  
34  
35  
36  
37  
38

## 39 **Methods**

### 40 **Search strategy**

41  
42 The systematic review was carried out in line with the Preferred Reporting Items for  
43 Systematic Reviews and Meta-Analyses (PRISMA). We used the PICO (Population,  
44 Intervention, Comparison, Outcome) criteria (22) to help determine eligibility criteria for  
45 inclusion develop the search strategy and composite search terms developed (see Table  
46 S1). We searched 8 online databases (listed in Table S1), covering a wide range of  
47 behavioural science research, and searched the reference lists of eligible papers.  
48  
49  
50  
51  
52

### 53 **Study selection and data extraction**

54  
55 Papers were selected based on the following inclusion criteria: if they (i) reported  
56 primary research assessing acceptability (based on the authors' definition of the study or  
57 findings) of one or more intervention(s) with adolescents and young adults 10-24; (ii)  
58 assessed acceptability of intervention(s) aimed at positively influencing one or more  
59  
60

1  
2  
3 development outcome(s), as defined by SDG indicators; (iii) reported on research  
4 conducted in Africa; (iv) were in the English Language; (v) were peer-reviewed and; (vi)  
5 were published between 1<sup>st</sup> January 2010 and 30<sup>th</sup> June 2020. We restricted our review to  
6 a 10-year period, taking into account the available researcher time and other available  
7 resources to conduct this review, and its relatively broad scope in terms of types of  
8 interventions and developmental outcomes included. We did not include limiters for  
9 study design or methodological tools, type of intervention or sector, or type of  
10 developmental outcome the intervention intended to influence. To be as inclusive as  
11 possible, we included studies that worked with broader samples (e.g., youth and adults)  
12 but disaggregated the results and reported findings specifically for the age group of  
13 interest (10-24). We imported all references from the online databases into Endnote,  
14 where duplicates were identified and removed. Abstracts were reviewed independently  
15 by the two first authors (ODS and MC) to determine relevance. Full text of potentially  
16 eligible studies were retrieved and independently examined by the same two authors;  
17 areas of disagreement or lack of clarity were resolved through discussion by the two  
18 authors and – where necessary – the assessment of a third author (GH). Reasons for  
19 exclusion of each paper not deemed eligible were recorded in an excel spread sheet. We  
20 developed a detailed extraction sheet, using Excel software, to extract key  
21 characteristics and findings of eligible papers. For reliability, the information for each  
22 paper was extracted separately by at least two of the first three authors and differences  
23 were resolved through discussion among the authors.

### 31 **Patient and public involvement**

32 Patients and the public were not involved in the preparation of this study.

### 33 **Results**

#### 34 ***Eligible studies included in the review***

35 Figure 1 presents the PRISMA flow diagram describing the process of study selection and  
36 reasons for study exclusion. A total of 4692 titles and abstracts were screened after  
37 removing duplicates, 278 articles were subjected to a full-text review, and a final 55  
38 studies were considered eligible for inclusion in the review.

#### 39 **Figure 1 here:**

#### 40 ***Study characteristics: publication year, location and sample***

41 Below we present a summary of key characteristics of the 55 eligible studies included in  
42 our review. More than half of the papers were published between 2018-2020 with 22% of  
43 the papers published in 2019, as shown in the supplementary figure S1.

44 Fig.2 below provides a visual representation of the location of studies on the continent.  
45 There is a clear concentration of acceptability studies in South and East Africa, with  
46 approximately half of identified studies conducted in South Africa (19) and Uganda (13).  
47 Only seven studies were from West and Central Africa and only one from North Africa.

#### 48 **Figure 2 here:**

1  
2  
3 The supplementary table S2 provides information on study characteristics and overall  
4 findings for the entire list of eligible studies, and by each type of intervention category  
5 (as indicated below) in separate sheets. Most study samples included male and female  
6 participants, while 11 studies worked only with females and three with males only. 44  
7 studies worked with samples that fell entirely within the specified age range (10-24),  
8 while 11 included studies worked with broader samples (e.g., youth and adults) but  
9 disaggregated the results and reported findings specifically for the age group of interest.  
10 To be as inclusive as possible, we included 10 studies that did not clearly specify the exact  
11 age range of participants, but for which available information indicated that the sample  
12 would have been entirely or almost entirely within this range (e.g. secondary school and  
13 university students (23-28) or where sample descriptive data indicated a sample  
14 consisting almost entirely of participants 24 or younger (29-31).

15  
16 While our inclusion criteria focused on primary acceptability research with adolescents  
17 and young adults, it should be noted that 25 studies also collected acceptability data  
18 from other stakeholders. These include caregivers or other family members (32-40),  
19 teachers, facilitators (26, 41, 42), community leaders or gate keepers, (28, 43), peer  
20 mentors, service providers and healthcare workers (44-51). Since the focus of this  
21 mapping review is the acceptability of young adults specifically, we do not synthesise or  
22 report on perspectives of other stakeholders.

### 23 24 25 ***Types and objectives of interventions assessed for acceptability.***

26 We categorised interventions assessed for acceptability both by type of intervention,  
27 based on their key components (see Figure 3), and stated objectives of the interventions  
28 (see Figure 4). In terms of type of intervention, interventions were classified as HIV or  
29 HPV vaccine interventions (10), E-health (10), HIV testing interventions (8), support group  
30 interventions (7), contraceptive interventions (6), voluntary medical male circumcision  
31 programs (VMMC) (4), school-based sexual and reproductive health education (4),  
32 economic support programs (4) and pre-exposure prophylaxis (PrEP) (2). Five studies did  
33 not fit into the above intervention categories and were grouped as 'other'; they  
34 consisted respectively of nutritional therapy, a psychosocial - home based care  
35 intervention, a counselling support intervention to address substance abuse, cervical  
36 cancer screening and a rectal microbicide intervention for HIV prevention. It should be  
37 noted that two of the studies reviewed assessed more than one intervention (45, 52) (3  
38 and 4 respectively). The total number of interventions assessed for acceptability was  
39 therefore 60.

### 40 41 42 **Figure 3 here:**

43 More detail on intervention sub-types is included in Table S2. For example, E-health  
44 interventions included game based (1), SMS based (7) and internet-based (2) programs.  
45 All 7 support group interventions provided psychosocial or educational support related  
46 to HIV, and 5 worked only with young adults living with HIV. One group intervention was  
47 delivered through both a social media platform and in-person meetings (53), one was a  
48  
49  
50  
51  
52  
53  
54  
55  
56  
57  
58  
59  
60

1  
2  
3 family based support intervention with adolescent-parent dyads (33), four were linked to  
4 public healthcare facilities (42, 47, 54, 55) and one was a community intervention (43).

6 The primary objectives of most interventions were focused on HIV- or sexual and  
7 reproductive health-related outcomes (see Figure 4): 19 primarily aimed to prevent new  
8 HIV infections, ten to prevent HPV infection, nine to increase HIV treatment adherence  
9 and retention in care, eight to increase the uptake of HIV testing, eight aimed at  
10 increasing contraceptive uptake and reducing early childbearing and six provided  
11 psychosocial support for adolescents living with HIV.

15 The objectives of almost all interventions were therefore linked to indicators within SDG3  
16 (ensuring healthy lives and promoting well-being). However, one study could also be  
17 linked to SDG2 (food security and improved nutrition), 6 to SDG4 (inclusive and equitable  
18 quality education), 8 to SDG5 (gender equality) and 1 to SDG6 (access to water and  
19 sanitation).

22 **Figure 4 here:**

### 24 ***Definitions and conceptual frameworks for acceptability***

26 Only seven of the 55 reviewed studies provided an explicit definition of acceptability and  
27 only six used a conceptual framework (as indicated in Table S2). Three definitions  
28 focused on the preference for or willingness to use the intervention: Tonen-Wolyec et al  
29 (2019) defined acceptability as consenting to and using the (HIV self-testing)  
30 intervention; Smith, Wallace (30) defined it as the preference for using the (HIV self-  
31 testing) device; and Katahoire et al (2013) defined acceptability as the willingness or  
32 reluctance to use and complete the intervention (in this case the 3 doses of HPV vaccine)  
33 (56).

37 Two definitions focused mainly on responses to the intervention. MacCarthy et al (2020)  
38 (48) referred to a definition and framework developed by Sekhon et al (2017)(20) and  
39 defined acceptability as the cognitive and emotional responses to an intervention (20,  
40 48). Parker et al (2013) (42) defined acceptability as how the intended individual  
41 recipients react to a program, guided by the Bowen feasibility framework (57). A further  
42 two studies conceptualized acceptability as an implementation outcome and focused on  
43 value, appeal and likeability: Kibel et al (2019)(58) referred to the perception among  
44 stakeholders that a certain element of the program was valued, agreeable, or  
45 satisfactory, while Sabben et al (2019)(34) defined acceptability as appeal, relevance,  
46 value, usability, and understandability, based on the Technology Acceptance Model's  
47 (TAM) framework (59).

52 Three studies referred to a conceptual framework but did not provide an explicit  
53 definition of acceptability. In their assessment of individual and environmental barriers  
54 and facilitators related to use of a school-based contraception clinic, Khoza et al (2019)  
55 referred to the social ecological framework (60). Sayles et al's (2010) study was guided  
56 by value-expectancy and social marketing theories (61); the authors investigated vaccine  
57 attitudes, normative vaccine beliefs, and perceived risk and severity of HIV as  
58  
59  
60

determinants of HIV vaccine uptake. Turiho et al's (2017) study used the symbolic interactionism theory (62) and some aspects of the Health Beliefs Model (HBM) to explain how community members' perceptions and their interaction shape vaccine acceptability.

### **Study design, methods and indicators**

Sixteen studies included in this review (29%) assessed 'anticipated' or prospective acceptability among adolescents who had not (yet) received the intervention (20). 18 studies (33%) assessed acceptability concurrently, during the delivery of the intervention, while 14 (25%) assessed acceptability post-intervention, retrospectively. The remaining seven (13%) of the studies assessed interventions prospectively and retrospectively; among these, two studies worked with separate groups of adolescents who had received and not yet received the intervention (52, 63), while the remaining 5 interviewed adolescents at two different stages of the intervention (40, 44, 55, 64, 65). Five studies involved adolescents in the study design (43, 50, 53, 55, 65).

20 studies described their methodology as solely qualitative, 18 as quantitative and 17 as mixed methods. 11 of the qualitative studies used only focus group discussions (FGDS), 7 used only in-depth interviews (IDIs) and 2 used both methods. Most of the quantitative studies (15) employed structured survey questionnaires. The mixed methods studies combined FGDs or IDIs with survey questionnaires, online surveys and evaluation reports.

As detailed in the supplementary table S2, a wide range of questions and indicators were used to measure acceptability. None of the studies used a standardized previously validated instrument, although two papers drew from existing instruments (66, 67). The majority of questions asked across studies covered participants' overall perceptions and experience of the intervention, willingness to use the intervention, understanding of the intervention, barriers and facilitators of access and use, the perceived effectiveness of the intervention and willingness to recommend or distribute it to others.

### **Acceptability findings**

Overall, acceptability of interventions assessed was high. Of the 55 studies, 30 assessed acceptability quantitatively and reported on the proportion of young adults in the sample that found the intervention acceptable. While some studies quantified acceptability through a single percentage, based on one question or indicator, a number of studies reported a range, based on multiple questions or indicators. One of the reviewed studies reported 100% acceptability (33), while acceptability ranged from 64% - 100% in 25 studies and 46% - 61% in 2 studies (27, 52, 68, 69). Only two studies clearly reported acceptability below 50%: at 37% for a contraceptive intervention in Tanzania (70) and 27% for an HPV vaccine study in Morocco (71). Reasons given for low acceptability of the contraceptive intervention were that adolescents and their peers were too young to be sensitized about condoms, that condoms would not be used properly and that using contraception was a sin (70). Reasons were not provided by adolescents for the Moroccan study;



1  
2  
3 however, in quantitative analysis, older age, female gender, studying at a public (versus  
4 private) school and lower educational attainment were associated with lower odds of  
5 acceptability for the HPV vaccine (71).  
6

7  
8 The remaining 25 studies did not quantify acceptability. However, the authors of two of  
9 these studies reported that adolescents found the interventions to be unacceptable,  
10 based on their overall findings. One study in South Africa assessed contraceptive  
11 interventions (32); a key reason for low acceptability was the belief that a school-based  
12 contraceptive clinic (SBCC) could promote promiscuity by sending a message that  
13 'teenage sex was acceptable' and making contraceptives easily accessible (32). The  
14 second study assessed a psychosocial home based care intervention in Tanzania (72),  
15 which adolescent participants felt did not align well with their expectations. They  
16 believed the intervention to be more relevant to their caregivers and were disappointed  
17 in the lack of financial support in a context of widespread poverty (72).  
18  
19

20  
21 Findings of the remaining 51 studies overall indicated high levels of acceptability. Some of  
22 these studies also provided various reasons as to why adolescents found the  
23 interventions acceptable (n=22) or (for a minority of adolescents) not acceptable (n=20).  
24 These are presented in Table 1, by type of intervention, for studies with both low and  
25 high overall acceptability. The main reasons e-Health interventions were acceptable to  
26 adolescents were: knowledge gained from the intervention regarding their sexual health  
27 (34, 65), the privacy these interventions provided (23, 48) and knowing how to make use  
28 of the intervention (25, 34). Adolescents who instead did not find these interventions  
29 acceptable felt that the content was not culturally appropriate (23, 25, 65), highlighted  
30 technological glitches (48, 65) or were concerned with inclusiveness where, for example,  
31 not all the young adults had access to a necessary device or risked unintended disclosure  
32 of private information when sharing devices (65, 73).  
33  
34  
35  
36  
37

38 Confidentiality, appropriateness, privacy, and decision-making autonomy were among  
39 the reasons adolescents found HIV testing interventions (including self-testing and  
40 testing in schools) acceptable (44, 64, 74). Fear of the procedure, concerns with the cost  
41 and validity of the test, and inadequate emotional support were reasons given for lack of  
42 acceptability (64, 75, 76). Support group interventions were considered acceptable  
43 because of the emotional support provided and because young adults found the groups  
44 to be empowering and were able to discuss HIV-related issues in a stigma-free  
45 environment (42, 47, 53, 55).  
46  
47  
48

49 Knowledge was a key reason for high vaccine acceptability for both HPV and HIV vaccine  
50 interventions. For example, adolescents' understanding that HPV vaccines could prevent  
51 cervical cancer and HIV made them more likely to accept the interventions (63).  
52 Conversely, lack of knowledge or understanding of the intervention was linked to low  
53 acceptability (36, 52, 56). Other reasons given for acceptability were greater female  
54 autonomy and agency to protect themselves, in the event of sexual violence or  
55 transactional sex, and encouragement of peers (36, 63). On the other hand, perceived  
56 cost, myths and distrust of vaccine providers, and fear of side effects, were themes  
57 raised to explain low acceptability (61, 77).  
58  
59  
60



Reasons for acceptability of economic support interventions included financial autonomy (78) and the freedom to decide how to use cash transfers (28). However, concerns around the process of selecting which individuals or households were to receive transfers, as well as inclusion, sustainability and effects on social relations and social equity within the community (38, 78), were factors that threatened acceptability.

**Table 1: Reasons provided by adolescents for acceptability and unacceptability of interventions, by type of intervention.**

| Type of intervention | Reasons given for acceptability                                                                                                                                                                                                                                                                                                                                                                                                                                                                                                                         | Reasons given for unacceptability                                                                                                                                                                                                                                                                                                                                                         |
|----------------------|---------------------------------------------------------------------------------------------------------------------------------------------------------------------------------------------------------------------------------------------------------------------------------------------------------------------------------------------------------------------------------------------------------------------------------------------------------------------------------------------------------------------------------------------------------|-------------------------------------------------------------------------------------------------------------------------------------------------------------------------------------------------------------------------------------------------------------------------------------------------------------------------------------------------------------------------------------------|
| <b>eHealth</b>       | <p>Knowledge provided on sexual health and HIV (25, 34)</p> <p>Privacy (23, 48)</p> <p>Increased self-efficacy to manage risky situations(34)</p> <p>Ease of use (34)</p> <p>Supportive mentors (29)</p> <p>Freedom to talk openly to mentors about HIV status and disclosure (29)</p>                                                                                                                                                                                                                                                                  | <p>Visual content considered not culturally appropriate (23)</p> <p>Conservative views about certain topics discussed (e.g., oral sex) (25, 65)</p> <p>Concerns around access and inclusiveness, as not all youth owned devices (65, 73)</p> <p>Fear of accidental disclosure of confidential information through device-sharing (73)</p> <p>Technical glitches with devices (48, 65)</p> |
| <b>Vaccines</b>      | <p>Protection from HPV in the case of sexual abuse or transactional sex (36)</p> <p>Protection from HIV infection when the transmission risk is out of an individual's control (45, 61)</p> <p>Desire to have unprotected sex for child-bearing (women on HIV-vaccine) (61)</p> <p>Being able to have unprotected sex and multiple sexual partners (male adolescents on HIV vaccine)(61)</p> <p>Protection in serodiscordant relationships while avoiding the HIV stigma and costs related to buying condoms (male adolescents on HIV vaccine) (45)</p> | <p>Distrust of government and scientists (61)</p> <p>Association of vaccine uptake with promiscuity (61)</p> <p>Fear of HIV testing and HIV stigma (61)</p> <p>Cost of vaccine (61)</p> <p>Fear of vaccine side effects (51, 61, 63, 77)</p> <p>Fear of injection (77)</p> <p>Lack of knowledge about vaccine and cervical cancer (36, 52, 56)</p>                                        |
| <b>HIV testing</b>   | <p>Confidentiality of HIV self-testing at schools (44, 76) (74)</p> <p>Ease of use of HIV self-test (44, 76)</p> <p>Fast results of self-test(44)</p> <p>Ability to test independently with self-test (64)</p> <p>Opportunity to know HIV status, for peace of mind and to plan for the future (provider-initiated testing) (39)</p> <p>Lower waiting time, less distance to facility, and friendlier staff at mobile (versus 'conventional') clinic(67)</p>                                                                                            | <p>Concern with validity of HIVST self-test kit results (64, 76)</p> <p>Costs of HIV test kit (64)</p> <p>Lack of emotional support with self-test(64, 76)</p> <p>Fear of the procedure (finger prick) (30, 75)</p> <p>Belief that school is not the right place for HIV testing (74)</p> <p>Lack of privacy and risk of stigma through school testing (74)</p>                           |
| <b>Support group</b> | <p>Emotional and social support provided (42, 47, 53, 55)</p> <p>Knowledge and skills provided (42, 55)</p> <p>Enjoyed participating (53)</p>                                                                                                                                                                                                                                                                                                                                                                                                           |                                                                                                                                                                                                                                                                                                                                                                                           |

|                                     |                                                                                                                                                                                                                                            |                                                                                                                                                                                                                                                                                                                                                                                                                                                                                                                                                                                                            |
|-------------------------------------|--------------------------------------------------------------------------------------------------------------------------------------------------------------------------------------------------------------------------------------------|------------------------------------------------------------------------------------------------------------------------------------------------------------------------------------------------------------------------------------------------------------------------------------------------------------------------------------------------------------------------------------------------------------------------------------------------------------------------------------------------------------------------------------------------------------------------------------------------------------|
|                                     | Stigma free environment (54)<br>Confidential space to openly discuss sexual health and behavior (42, 53)<br>Greater decision-making autonomy to negotiate safer sexual relationships (42)                                                  |                                                                                                                                                                                                                                                                                                                                                                                                                                                                                                                                                                                                            |
| <b>SRH education</b>                | Increased knowledge on sexual and reproductive health (24, 41)<br>Supportive teachers at youth clubs (41)<br><br>Girls more comfortable attending school during menstruation (24)                                                          | Conservative views about certain topics discussed (linked to sexual intercourse) (41)                                                                                                                                                                                                                                                                                                                                                                                                                                                                                                                      |
| <b>VMMC</b>                         | Material support provided during the intervention (e.g. food, shelter and security) (58)<br>Knowledge gained through participation (58)                                                                                                    | Penile swelling after removal and transient discoloration of inner foreskin (79)                                                                                                                                                                                                                                                                                                                                                                                                                                                                                                                           |
| <b>Economic support</b>             | Increased school retention (28, 38, 78)<br><br>Financial autonomy (28, 78)<br><br>Easy access to cash transfer (28)                                                                                                                        | Concerns with sustainability and impact of transfer termination (78)<br>Exclusion of certain households or individuals in the community from receiving transfers (28, 38)<br>Perception that selection process was unfair (38)<br><br>Lack of interest in family planning services accessible through (conditional) benefit cards (80)                                                                                                                                                                                                                                                                     |
| <b>Contraception</b>                | Ease of use of self-injectable and female contraceptives (66, 81)<br><br>Privacy and convenience of self-injectable contraceptives (81)<br>Female autonomy to control female contraceptive use(45, 66)<br>Condom fatigue and HIV fear (45) | Conservative views on condom use and messaging (e.g. using condoms is a sin, condoms may encourage early sexual debut) (32, 70)<br>Belief that adolescents are too young for condom promotion and sexual activity <sup>3</sup><br>Fear of needles and self-injection for injectable contraceptives (81)<br>Concerns with not being able to use condoms properly (70)<br>Belief that condoms cause AIDS and other diseases (70)<br><br>Concerns about the effect of cervical contraceptive being in the body for a long time (66)<br>Concern with stigma(45)<br><br>Waiting times at health facilities (45) |
| <b>PrEP</b>                         | Prevents transmission in serodiscordant couples(45)<br><br>Easy to use (45)                                                                                                                                                                | Conflict with traditional methods and beliefs(45)<br><br>Fear of side effects (45)                                                                                                                                                                                                                                                                                                                                                                                                                                                                                                                         |
| <b>Psychosocial home-based care</b> |                                                                                                                                                                                                                                            | Program more relevant to caregiver versus adolescent needs (72)<br>Lack of financial support in a context of widespread poverty (72)                                                                                                                                                                                                                                                                                                                                                                                                                                                                       |

## Discussion

Findings of this review indicate two positive trends. The first is an increase, over the past decade, in the number of acceptability studies with adolescents and youth on the continent. Though numbers are overall low, this could signal increasing recognition of the value of engaging young people when designing and implementing interventions intended for them. The second is that acceptability of interventions assessed was generally high. This suggests an overall good alignment of interventions with adolescent needs and preferences. While studies focusing on acceptability among general adolescent populations are scarce even in high income countries, our findings of overall high acceptability were in line with a review on the acceptability of e-mental health

1  
2  
3 services for children, adolescents, and young adults conducted in Canada (82). However,  
4 we should also be aware of the possibility of publication bias (83, 84), as research  
5 showing less favourable acceptability results may be less likely to be written up and  
6 published.  
7  
8  
9

10  
11 A key limitation of this review is that we did not include grey literature, given available  
12 resources, the review's already broad scope, and to ensure a minimum quality of studies  
13 included. We also did not include studies published before 2010 and after June 2020, or  
14 studies that weren't published in English, so the review may have excluded relevant  
15 studies outside of this time period or carried out in African countries where English is not  
16 the (only) official language. We also did not conduct a quality assessment, given the  
17 heterogeneity of interventions assessed and study designs; however, we note that this is  
18 not a requirement of a mapping review, which aims to summarise available evidence in  
19 an area versus focus on a particular research question (85-87).  
20  
21  
22  
23  
24  
25

### 26 **Acceptability findings**

27  
28 Despite the diversity of intervention settings, types of interventions and modes of  
29 delivery across studies, several common themes emerged from reasons given by  
30 adolescents to explain why specific interventions were acceptable to them. These  
31 included the product or intervention being easy to use, knowledge of the intervention or  
32 knowledge provided by the intervention, the intervention allowing for (greater)  
33 autonomy, adolescents feeling supported while participating in the intervention and  
34 feeling assured that their privacy and confidential information would be protected. Ease  
35 of use (88, 89) and support received (90) from the intervention were reasons for  
36 acceptability in high income countries. Although reasons for 'unacceptability' were more  
37 diverse, overarching themes could also be identified among these, for example:  
38 conservative views about the intervention or its content; concerns around intervention  
39 costs, access and inclusiveness; fear of pain and side effects (for biomedical  
40 interventions); stigma, myths or distrust; and lack of knowledge or support. The cost (91)  
41 of interventions, pain (92) and conservative views about the intervention (93) have also  
42 been outlined as reasons for unacceptability among adolescents and youth in low middle  
43 income and high income countries. While certain drivers of unacceptability mirrored  
44 those of acceptability (e.g. knowledge and support), these drivers mostly differed,  
45 suggesting that acceptability and unacceptability are not necessarily represented by one  
46 continuum.  
47  
48  
49  
50  
51  
52  
53  
54

55 These findings suggest that intervention developers and implementers across the  
56 continent should pay attention to key aspects of interventions and their delivery that  
57 adolescents clearly care about and seek to address these from the intervention  
58 development phase. They should ensure that adolescents are provided with adequate  
59  
60

1  
2  
3 knowledge, training, and resources to properly understand the intervention and feel  
4 confident in their ability to use it and that they have access to sufficient logistical and  
5 emotional support while participating. They should also ensure that these young  
6 people's confidential information is protected, so that they are in turn protected from  
7 much-feared stigma and other potential negative social consequences. Moreover, they  
8 should bear in mind that adolescents value autonomy and that this has a gender  
9 dimension. Autonomy relates not only to being able to choose to participate in and use  
10 an intervention, but also being empowered by the knowledge it may provide and the  
11 greater control it may afford young people (particularly young women) in managing high  
12 risk situations and unequal relationships.  
13  
14  
15  
16  
17  
18

19 It may also be worth paying particular attention to acceptability findings for specific  
20 types of interventions, given current African and global public health challenges. For  
21 example, the role of digital technology in achieving many of the SDGs is well documented  
22 (94) and merits particular attention in the context of the Covid-19 pandemic (95, 96).  
23 While young people remain the most connected population group to digital  
24 platforms(97), there is a clear digital divide, as more than 60% of young adults in Africa do  
25 not have access to internet (98, 99). Findings of this review show overall high  
26 acceptability of e-Health interventions (34, 50), as adolescents highlighted opportunities  
27 presented by digital technology, for example by reducing the cost of in-person  
28 interaction (53). Yet concerns raised around connectivity issues, lack of access to devices  
29 and unintended disclosure of confidential information (53, 73) represent challenges for  
30 the acceptability, equitable access, and effectiveness of e-Health programs. It is  
31 therefore important for intervention providers to assess these challenges early on, and  
32 to explore ways of potentially increasing access to devices or technologies within the  
33 intervention itself or by supporting concurrent initiatives (65).  
34  
35  
36  
37  
38

39 Low acceptability of several interventions aimed at increasing contraceptive use and HIV  
40 testing also merits particular attention. HIV transmission and relatively low rates of HIV  
41 testing and linkage to antiretroviral therapy (ART) remain a concern among young adults  
42 (100, 101). Several studies included in this review highlighted, for example, adolescents'  
43 fear of stigma and lack of privacy regarding HIV testing interventions in schools (74),  
44 concerns about not being able to properly perform oral HIV testing on their own (76) and  
45 conservative views of contraceptive promotion and use (32, 70). These perspectives are  
46 likely shaped by inadequate understanding of interventions, but also by social norms  
47 surrounding sexuality and contraception within adolescents' homes, schools, and  
48 communities (102, 103). Also, fear of vaccines and their side effects (104, 105) are  
49 important to note and address, in relation not only to HPV prevention, but also to the  
50 current Covid-19 vaccine rollout.  
51  
52  
53  
54  
55  
56  
57

58 All of the above examples highlight the importance of strengthening adolescents'  
59 knowledge of interventions and how to interact with them, but also of understanding  
60

1  
2  
3 and engaging with the broader context within which adolescent acceptability is shaped  
4 (102). One way to achieve this is to involve adolescents (preferably potential end-users)  
5 early in the design and planning phase of the intervention and – if possible - at various  
6 stages of the intervention life cycle. Yet, as indicated above, less than half of the studies  
7 in this review (42%) assessed prospective acceptability and very few studies involved  
8 adolescents in the study design and/or at multiple phases of the intervention. There is  
9 clearly potential to allow for more meaningful and consistent adolescent engagement, if  
10 young people are to have a stronger role in shaping the development, adaptation and  
11 scale up of interventions (20).  
12  
13  
14

15  
16 A second key approach would be to engage early on and assess acceptability with other  
17 stakeholders who are central to an intervention being well-targeted, well-implemented  
18 and accepted by adolescents and the broader community. These may include  
19 intervention implementers and facilitators, but also caregivers, partners and peers,  
20 teachers and community leaders. As noted above, 25 studies in this review also assessed  
21 acceptability of other types of stakeholders. Future review analyses and acceptability  
22 studies could further focus on acceptability among these groups of individuals, and its  
23 implications for adolescent acceptability and intervention success.  
24  
25  
26  
27  
28

### 29 **Gaps and key areas for future research**

30  
31 Our review highlights several key gaps and related areas for future intervention  
32 acceptability research. First, there appears to be a gap in geographical coverage,  
33 particularly in West, Central and North Africa. However, as noted above, confining our  
34 search to English language publications may have excluded some studies from African  
35 countries where French is the first language. Given that adolescent needs and  
36 preferences are likely to differ across areas with very different social and cultural norms  
37 and faith contexts (106), we cannot simply extrapolate acceptability findings to other  
38 countries or communities across the continent.  
39  
40  
41

42  
43 Second, there is clearly scope for more acceptability research in important areas for  
44 adolescent development beyond (physical) health and, within the health sector, beyond  
45 HIV. As important as reducing HIV transmission and increasing testing and treatment  
46 adherence may be in this population (100, 101), they are clearly not the only dimensions  
47 of adolescent health and broader wellbeing that merit attention and investment. There is  
48 a glaring lack of acceptability studies in areas of adolescent development beyond SDG 3.  
49 These include education access and outcomes, employment opportunities, access to  
50 water and other services, gender equality and protection from violence, social protection  
51 and mental health (107).  
52  
53  
54

55  
56 The focus on specific types of interventions likely reflects, to a large extent, global health  
57 funding and research priorities over the past decades. There has been a considerable  
58 amount of international aid dedicated to addressing HIV (108, 109) and particular concern  
59 around the acceptability of HIV interventions. Moreover, the concentration of  
60 acceptability research in specific countries in Africa is likely in part a reflection of



1  
2  
3 disparities in independent research infrastructure and capacity across the continent (110,  
4 111). It would also seem that ‘acceptability’ is a concept and term that has gained traction  
5 primarily within the health sector (20). The extension of acceptability research to  
6 geographical and developmental areas where it is currently scarce therefore cannot be  
7 addressed solely by decisions of individual research teams. It will to some extent require  
8 a change in global health and funding priorities, and the ‘adoption’ of acceptability  
9 research by other sectors.  
10  
11  
12

13 A third gap highlighted by this review is the considerable scope to further conceptualise  
14 the construct of acceptability, by more clearly defining it and identifying its key  
15 components. Our review reinforced the absence of a clear or standard definition of  
16 acceptability, or common tools and indicators. In fact, the large majority of papers  
17 included in this review (48) referred to the concept of acceptability without defining it at  
18 all, requiring the reader to review the questions and indicators used to gain some  
19 understanding of how the construct of acceptability was conceptualised and  
20 operationalized. As highlighted by other authors, this lack of common definitions and  
21 frameworks makes the selection of measurement indicators for empirical enquiry in this  
22 area more difficult and the comparability of acceptability results challenging (112, 113).  
23 There have been recent efforts to address these gaps; in particular, Sekhon and  
24 colleagues’ theoretical framework for acceptability (TFA), published in 2017 (20), has  
25 made a valuable contribution to the scarce conceptual literature in the field. However,  
26 there is still much work to be done to apply and test the framework in specific  
27 populations. For example, its relevance and completeness in investigating acceptability  
28 among adolescents, in less-resourced settings and beyond the (biomedical) health sector  
29 is still unclear. Also unclear is the important link between intervention acceptability and  
30 uptake, considering that willingness to use the intervention is often included among  
31 questions used to assess acceptability (see table S2). Lastly, it is encouraging to note that  
32 a relatively large number of studies in our review used mixed methods approaches to  
33 assess acceptability; however, there is clearly still scope to employ and combine more  
34 innovative methodologies (55, 65).  
35  
36  
37  
38  
39  
40  
41  
42  
43  
44

## 45 **Conclusion**

46 As the first systematic review to aggregate and synthesise a decade of acceptability  
47 studies with adolescents and youth in Africa, we believe this study makes a valuable  
48 contribution to the African and global literature on acceptability. It highlights the overall  
49 high level of acceptability of the interventions assessed, and some of the reasons why  
50 adolescents and young adults may or may not find interventions acceptable– both  
51 specific to particular types of interventions and common across intervention types.  
52  
53

54 However, it also exposes considerable scope for future acceptability research and review  
55 work, to extend and strengthen the existing body of evidence. This should include  
56 extending acceptability research beyond the health (and particularly HIV) sector and to  
57 countries in Africa where this type of research is still scarce; including adolescents and  
58  
59  
60



1  
2  
3 other potential key stakeholders earlier, and potentially throughout, the intervention  
4 process; further conceptualising the construct of acceptability; and investigating the  
5 relationship between acceptability and intervention uptake and success.  
6  
7

#### 8 **Data availability statement**

9  
10 No additional data are available.

#### 11 **Patient consent for publication**

12  
13 Not required.

14  
15  
16 **Acknowledgements:** ODS, MC, GH, CD, LC and LS receive funding from the UKRI GCRF  
17 Accelerating Achievement for Africa's Adolescents (Accelerate) Hub (Grant Ref:  
18 ES/S008101/1) and the Oak Foundation: (Grant Number R46194/AA001)  
19

20  
21 **Contributors:** ODS and MC were involved in the conceptualisation of the paper, the data  
22 extraction and analysis, and the manuscript writing; GHR was part of the data extraction  
23 and analysis, and reviewed and revised the manuscript; CD reviewed and revised the  
24 manuscript; LC reviewed and revised the manuscript; and LS reviewed and revised the  
25 manuscript. All authors read, reviewed and approved the final manuscript.  
26

27  
28 **Funding Statement:** Funding received from the South African Research Chair in Health  
29 Systems, Complexity and Social Change supported by the South African Research Chair's  
30 Initiative of the Department of Science and Technology and National Research  
31 Foundation of South Africa (Grant No 82769). Any opinion, finding and conclusion or  
32 recommendation expressed in this material is that of the author and the NRF does not  
33 accept any liability in this regard.  
34  
35

36 **Ethics approval statement:** Not applicable

37  
38 **Competing interests:** None declared.  
39  
40  
41  
42  
43

#### 44 **References**

- 45  
46 1. Cluver LD, Orkin FM, Meinck F, Boyes ME, Yakubovich AR, Sherr L. Can social protection  
47 improve sustainable development goals for adolescent health? PloS one. 2016;11(10):e0164808.  
48 2. Bhutta ZA, Yount KM, Bassat Q, Arikainen AA. Revisiting child and adolescent health in the  
49 context of the Sustainable Development Goals. Public Library of Science San Francisco, CA USA;  
50 2020.  
51 3. Sheehan P, Sweeny K, Rasmussen B, Wils A, Friedman HS, Mahon J, et al. Building the  
52 foundations for sustainable development: a case for global investment in the capabilities of  
53 adolescents. The Lancet. 2017;390(10104):1792-806.  
54 4. United Nations Department of Economic Social Affairs UN. 2019 Revision of World  
55 Population Prospects. 2019.  
56 5. Tiwari S, Daidone S, Ruvalcaba MA, Prifti E, Handa S, Davis B, et al. Impact of cash transfer  
57 programs on food security and nutrition in sub-Saharan Africa: A cross-country analysis. Global Food  
58 Security. 2016;11:72-83.  
59  
60

6. Kilburn K, Ferrone L, Pettifor A, Wagner R, Gómez-Olivé FX, Kahn K. The Impact of a Conditional Cash Transfer on Multidimensional Deprivation of Young Women: Evidence from South Africa's HTPN 068. *Social Indicators Research*. 2020;151(3):865-95.
7. Super S, Hermens N, Verkooijen K, Koelen M. Examining the relationship between sports participation and youth developmental outcomes for socially vulnerable youth. *BMC Public Health*. 2018;18(1):1012.
8. World Health Organization. Why invest in adolescent health? 2021 [Available from: [https://www.who.int/maternal\\_child\\_adolescent/topics/adolescence/why-invest/en/](https://www.who.int/maternal_child_adolescent/topics/adolescence/why-invest/en/)].
9. Dahl RE, Allen NB, Wilbrecht L, Suleiman AB. Importance of investing in adolescence from a developmental science perspective. *Nature*. 2018;554(7693):441-50.
10. Lutz W, Crespo Cuaresma J, Kebede E, Prskawetz A, Sanderson WC, Striessnig E. Education rather than age structure brings demographic dividend. *Proc Natl Acad Sci U S A*. 2019;116(26):12798-803.
11. Bongaarts J, Gragnolati M, Ahmed S, Corker J. *Population, development, and policy*. 2020.
12. Salam RA, Das JK, Lassi ZS, Bhutta ZA. Adolescent health interventions: Conclusions, evidence gaps, and research priorities. *Journal of Adolescent Health*. 2016;59(4):S88-S92.
13. Chandra-Mouli V, Lane C, Wong S. What Does Not Work in Adolescent Sexual and Reproductive Health: A Review of Evidence on Interventions Commonly Accepted as Best Practices. *Global Health: Science and Practice*. 2015;3(3):333.
14. World Health Organization. *Global standards for quality health-care services for adolescents: a guide to implement a standards-driven approach to improve the quality of health care services for adolescents*. 2015.
15. Malti T, Noam GG, Beelmann A, Sommer S. Toward dynamic adaptation of psychological interventions for child and adolescent development and mental health. *Journal of Clinical Child & Adolescent Psychology*. 2016;45(6):827-36.
16. Patton GC, Sawyer SM, Ross DA, Viner RM, Santelli JS. From Advocacy to Action in Global Adolescent Health. *Journal of Adolescent Health*. 2016;59(4):375-7.
17. Burt MR. Reasons to invest in adolescents. *Journal of adolescent Health*. 2002;31(6):136-52.
18. Stok FM, de Ridder DTD, de Vet E, Nureeva L, Luszczynska A, Wardle J, et al. Hungry for an intervention? Adolescents' ratings of acceptability of eating-related intervention strategies. *BMC Public Health*. 2016;16(1):5.
19. Silva MR, Collier-Meek MA, Coddling RS, DeFouw ER. Acceptability assessment of school psychology interventions from 2005 to 2017. *Psychology in the Schools*. 2020;57(1):62-77.
20. Sekhon M, Cartwright M, Francis JJ. Acceptability of healthcare interventions: an overview of reviews and development of a theoretical framework. *BMC Health Services Research*. 2017;17(1):88.
21. Yeager DS, Dahl RE, Dweck CS. Why interventions to influence adolescent behavior often fail but could succeed. *Perspectives on Psychological Science*. 2018;13(1):101-22.
22. O'Connor D, Green S, Higgins JP. Defining the review question and developing criteria for including studies. *Cochrane handbook for systematic reviews of interventions: Cochrane book series*. 2008:81-94.
23. Bull S, Nabembezi D, Birungi R, Kiwanuka J, Ybarra M. Cyber-Senga: Ugandan youth preferences for content in an internet-delivered comprehensive sexuality education programme. *East African journal of public health*. 2010;7(1):58-63.
24. Kansiime C, Hytti L, Nalugya R, Nakuya K, Namirembe P, Nakalema S, et al. Menstrual health intervention and school attendance in Uganda (MENISCUS-2): a pilot intervention study. *BMJ open*. 2020;10(2).
25. Ybarra ML, Bull SS, Prescott TL, Birungi R. Acceptability and feasibility of CyberSenga: an Internet-based HIV-prevention program for adolescents in Mbarara, Uganda. *AIDS Care*. 2014;26(4):441-7.
26. Herman L, Ovuga E, Mshilla M, Ojara S, Kimbugwe G, Adrawa AP, et al. Knowledge, Perceptions and Acceptability to Strengthening Adolescents' Sexual and Reproductive Health

- 1  
2  
3 Education amongst Secondary Schools in Gulu District. *World academy of science, engineering and*  
4 *technology.* 2013;7(7):1787-802.
- 5 27. Mitchell KJ, Bull S, Kiwanuka J, Ybarra ML. Cell phone usage among adolescents in Uganda:  
6 acceptability for relaying health information. *Health Education Research.* 2011;26(5):770-81.
- 7 28. Banda E, Svanemyr J, Sandøy IF, Goicolea I, Zulu JM. Acceptability of an economic support  
8 component to reduce early pregnancy and school dropout in Zambia: a qualitative case study. *Global*  
9 *Health Action.* 2019;12(1):1-11.
- 10 29. Hacking D, Mgengwana-Mbakaza Z, Cassidy T, Runeyi P, Duran LT, Mathys RH, et al. Peer  
11 mentorship via mobile phones for newly diagnosed HIV-positive youths in clinic care in Khayelitsha,  
12 South Africa: Mixed methods study. *Journal of Medical Internet Research.* 2019;21(12).
- 13 30. Smith P, Wallace M, Bekker LG. Adolescents' experience of a rapid HIV self-testing device in  
14 youth-friendly clinic settings in Cape Town South Africa: a cross-sectional community based usability  
15 study. *Journal of the International Aids Society.* 2016;19.
- 16 31. Ayissi CA, Wamai RG, Oduwo GO, Perlman S, Welty E, Welty T, et al. Awareness,  
17 acceptability and uptake of human papilloma virus vaccine among Cameroonian school-attending  
18 female adolescents. *Journal of community health.* 2012;37(6):1127-35.
- 19 32. Khoza N, Zulu P, Shung-King M. Acceptability and feasibility of a school-based contraceptive  
20 clinic in a low-income community in South Africa. *Primary Health Care Research & Development*  
21 *(Cambridge University Press / UK).* 2019;20:N.PAG-N.PAG.
- 22 33. Kuo C, Mathews C, Giovenco D, Atujuna M, Beardslee W, Hoare J, et al. Acceptability,  
23 Feasibility, and Preliminary Efficacy of a Resilience-Oriented Family Intervention to Prevent  
24 Adolescent HIV and Depression: A Pilot Randomized Controlled Trial. *AIDS Education & Prevention.*  
25 2020;32(1):67-81.
- 26 34. Sabben G, Mudhune V, Ondeng'e K, Odero I, Ndivo R, Akelo V, et al. A smartphone game to  
27 prevent HIV among young africans (Tumaini): assessing intervention and study acceptability among  
28 adolescents and their parents in a randomized controlled trial. *JMIR mHealth and uHealth.*  
29 2019;7(5):e13049.
- 30 35. Carney T, Johnson K, Carrico A, Myers B. Acceptability and feasibility of a brief substance use  
31 intervention for adolescents in Cape Town, South Africa: A pilot study. *International journal of*  
32 *psychology : Journal international de psychologie.* 2020.
- 33 36. Katz IT, Nkala B, Dietrich J, Wallace M, Bekker LG, Pollenz K, et al. A Qualitative Analysis of  
34 Factors Influencing HPV Vaccine Uptake in Soweto, South Africa among Adolescents and Their  
35 Caregivers. *Plos One.* 2013;8(8).
- 36 37. Niase F, Varloteaux M, Diop K, Ndiaye SM, Diouf FN, Mbodj PB, et al. Adherence to ready-  
37 to-use food and acceptability of outpatient nutritional therapy in HIV-infected undernourished  
38 Senegalese adolescents: research-based recommendations for routine care. *Bmc Public Health.*  
39 2020;20(1).
- 40 38. MacPhail C, Adato M, Kahn K, Selin A, Twine R, Khoza S, et al. Acceptability and Feasibility of  
41 Cash Transfers for HIV Prevention Among Adolescent South African Women. *AIDS & Behavior.*  
42 2013;17(7):2301-12.
- 43 39. Ferrand RA, Trigg C, Bandason T, Ndhlovu CE, Mungofa S, Nathoo K, et al. Perception of Risk  
44 of Vertically Acquired HIV Infection and Acceptability of Provider-Initiated Testing and Counseling  
45 Among Adolescents in Zimbabwe. *American Journal of Public Health.* 2011;101(12):2325-32.
- 46 40. Jayeoba O, Dryden-Peterson S, Okui L, Smeaton L, Magetse J, Makori L, et al. Acceptability of  
47 male circumcision among adolescent boys and their parents, Botswana. *AIDS and Behavior.*  
48 2012;16(2):340-9.
- 49 41. Chirwa-Kambole E, Svanemyr J, Sandoy I, Hangoma P, Zulu JM. Acceptability of youth clubs  
50 focusing on comprehensive sexual and reproductive health education in rural Zambian schools: a  
51 case of Central Province. *Bmc Health Services Research.* 2020;20(1).
- 52  
53  
54  
55  
56  
57  
58  
59  
60

- 1
- 2
- 3
- 4 42. Parker L, Maman S, Pettifor A, Chalachala JL, Edmonds A, Golin CE, et al. Feasibility analysis
- 5 of an evidence-based positive prevention intervention for youth living with HIV/AIDS in Kinshasa,
- 6 Democratic Republic of the Congo. *AIDS Education and Prevention*. 2013;25(2):135-50.
- 7 43. Knopf A, Agot K, Sidle J, Naanyu V, Morris M. "This is the medicine:" A Kenyan community
- 8 responds to a sexual concurrency reduction intervention. *Social Science & Medicine*. 2014;108:175-
- 9 84.
- 10 44. Tonen-Wolyec S, Batina-Agasa S, Muwonga J, Bouassa RSM, Tshilumba CK, Belec L.
- 11 Acceptability, feasibility, and individual preferences of blood-based HIV self-testing in a population-
- 12 based sample of adolescents in Kisangani, Democratic Republic of the Congo. *Plos One*. 2019;14(7).
- 13 45. Atujuna M, Newman PA, Wallace M, Eluhu M, Rubincam C, Brown B, et al. Contexts of
- 14 vulnerability and the acceptability of new biomedical HIV prevention technologies among key
- 15 populations in South Africa: A qualitative study. *PLoS ONE*. 2018;13(2):1-17.
- 16 46. Giovenco D, Kuo C, Underhill K, Hoare J, Operario D. "The Time Has Arrived": Perceptions of
- 17 Behavioral Adjustments in the Context of Pre-Exposure Prophylaxis Availability Among Adolescents
- 18 in South Africa. *AIDS Education & Prevention*. 2018;30(6):463-73.
- 19 47. James S, Martin CE, Moalusi B, Beery M, Pahad S, Imrie J. Integrated access to care and
- 20 treatment (I ACT) support groups for adolescents living with HIV in public healthcare facilities in
- 21 South Africa: feasibility and acceptability for scaling up. *AIDS care*. 2018;30(9):1107-13.
- 22 48. MacCarthy S, Wagner Z, Mendoza-Graf A, Gutierrez CI, Samba C, Birungi J, et al. A
- 23 randomized controlled trial study of the acceptability, feasibility, and preliminary impact of SITA
- 24 (SMS as an Incentive To Adhere): a mobile technology-based intervention informed by behavioral
- 25 economics to improve ART adherence among youth in Uganda. *BMC infectious diseases*.
- 26 2020;20(1):1-10.
- 27 49. Tabong PT, Maya ET, Adda-Balinia T, Kusi-Appouh D, Birungi H, Tabsoba P, et al.
- 28 Acceptability and stakeholders perspectives on feasibility of using trained psychologists and health
- 29 workers to deliver school-based sexual and reproductive health services to adolescents in urban
- 30 Accra, Ghana. *Reproductive health*. 2018;15(1):122.
- 31 50. Laidlaw R, Dixon D, Morse T, Beattie TK, Kumwenda S, Mmemberera G. Using participatory
- 32 methods to design an mHealth intervention for a low income country, a case study in Chikwawa,
- 33 Malawi. *BMC Medical Informatics & Decision Making*. 2017;17:1-12.
- 34 51. Turiho AK, Okello ES, Muhwezi WW, Katahoire AR. Perceptions of human papillomavirus
- 35 vaccination of adolescent schoolgirls in western Uganda and their implications for acceptability of
- 36 HPV vaccination: a qualitative study. *BMC research notes*. 2017;10(1):431.
- 37 52. Mburu A, Itsura P, Mabeya H, Kaaria A, Brown DR. Knowledge of Cervical Cancer and
- 38 Acceptability of Prevention Strategies Among Human Papillomavirus-Vaccinated and Human
- 39 Papillomavirus-Unvaccinated Adolescent Women in Eldoret, Kenya. *Bioresearch Open Access*.
- 40 2019;8(1):139-45.
- 41 53. Dulli L, Ridgeway K, Packer C, Murray KR, Mumuni T, Plourde KF, et al. A Social Media-Based
- 42 Support Group for Youth Living With HIV in Nigeria (SMART Connections): Randomized Controlled
- 43 Trial. *Journal of medical Internet research*. 2020;22(6):e18343.
- 44 54. Barker D, Enimil A, Galárraga O, Bosomtwe D, Mensah N, Thamocharan S, et al. In-Clinic
- 45 Adolescent Peer Group Support for Engagement in Sub-Saharan Africa: A Feasibility and
- 46 Acceptability Trial. *Journal of the International Association of Providers of AIDS Care*. 2019;18:1-8.
- 47 55. Snyder K, Wallace M, Duby Z, Aquino LDH, Stafford S, Hosek S, et al. Preliminary results from
- 48 Hlanganani (Coming Together): A structured support group for HIV-infected adolescents piloted in
- 49 Cape Town, South Africa. *Children and Youth Services Review*. 2014;45:114-21.
- 50 56. Katahoire AR, Wani JA, Murokora D, Mugisha E, LaMontague DS. Acceptability of HPV
- 51 vaccine among young adolescent girls in Uganda: Young people's perspectives count. *International*
- 52 *Journal of Child and Adolescent Health*. 2013;6(2):211-9.
- 53 57. Bowen DJ, Kreuter M, Spring B, Cofta-Woerpel L, Linnan L, Weiner D, et al. How we design
- 54 feasibility studies. *American journal of preventive medicine*. 2009;36(5):452-7.
- 55
- 56
- 57
- 58
- 59
- 60

- 1
- 2
- 3
- 4 58. Kibel M, Shah P, Ayuku D, Makori D, Kamaara E, Choge E, et al. Acceptability of a pilot
- 5 intervention of voluntary medical male circumcision and HIV education for street-connected youth
- 6 in Western Kenya. *Journal of Adolescent Health*. 2019;64(1):43-8.
- 7 59. Davis FD. User acceptance of information technology: system characteristics, user
- 8 perceptions and behavioral impacts. *International Journal of Man-Machine Studies*. 1993;38(3):475-
- 9 87.
- 10 60. Golden SD, Earp JAL. Social Ecological Approaches to Individuals and Their Contexts:Twenty
- 11 Years of Health Education & Behavior Health Promotion Interventions. *Health Education & Behavior*.
- 12 2012;39(3):364-72.
- 13 61. Sayles JN, Macphail CL, Newman PA, Cunningham WE. Future HIV Vaccine Acceptability
- 14 Among Young Adults in South Africa. *Health Education & Behavior*. 2010;37(2):193-210.
- 15 62. Jeon YH. The application of grounded theory and symbolic interactionism. *Scandinavian*
- 16 *journal of caring sciences*. 2004;18(3):249-56.
- 17 63. Turiho AK, Okello ES, Muhwezi WW, Harvey S, Byakika-Kibwika P, Meya D, et al. Effect of
- 18 school-based human papillomavirus (hpv) vaccination on adolescent girls' knowledge and
- 19 acceptability of the HPV vaccine in Ibanda District in Uganda. *African journal of reproductive health*.
- 20 2014;18(4):45-53.
- 21 64. Ritchwood TD, Selin A, Pettifor A, Lippman SA, Gilmore H, Kimaru L, et al. HIV self-testing:
- 22 South African young adults' recommendations for ease of use, test kit contents, accessibility, and
- 23 supportive resources. *Bmc Public Health*. 2019;19.
- 24 65. Ybarra ML, Agaba E, Chen E, Nyemara N. Iterative Development of In This toGether, the First
- 25 mHealth HIV Prevention Program for Older Adolescents in Uganda. *AIDS and behavior*. 2020.
- 26 66. van der Straten A, Sahin-Hodoglugil N, Clouse K, Mtetwa S, Chirenje MZ. Feasibility and
- 27 potential acceptability of three cervical barriers among vulnerable young women in Zimbabwe. *The*
- 28 *journal of family planning and reproductive health care*. 2010;36(1):13-9.
- 29 67. Smith P, Tolla T, Marcus R, Bekker L-G. Mobile sexual health services for adolescents:
- 30 investigating the acceptability of youth-directed mobile clinic services in Cape Town, South Africa.
- 31 *BMC Health Services Research*. 2019;19(1):N.PAG-N.PAG.
- 32 68. Peltzer K, Mlambo M. Prevalence and Acceptability of Male Circumcision among Young Men
- 33 in South Africa. *Studies on Ethno-Medicine*. 2012;6(3):179-86.
- 34 69. Cele MA, Archary M. Acceptability of short text messages to support treatment adherence
- 35 among adolescents living with HIV in a rural and urban clinic in KwaZulu-Natal. *Southern African*
- 36 *journal of HIV medicine*. 2019;20(1):976.
- 37 70. Exavery A, Mubyazi GM, Rugemalila J, Mushi AK, Massaga JJ, Malebo HM, et al. Acceptability
- 38 of condom promotion and distribution among 10-19 year-old adolescents in Mpwapwa and Mbeya
- 39 rural districts, Tanzania. *BMC Public Health*. 2012;12:569.
- 40 71. Zouheir Y, Daouam S, Hamdi S, Alaoui A, Fechtali T. Knowledge of human papillomavirus and
- 41 acceptability to vaccinate in adolescents and young adults of the Moroccan population. *Journal of*
- 42 *pediatric and adolescent gynecology*. 2016;29(3):292-8.
- 43 72. Busza J, Besana GVR, Mapunda P, Oliveras E. Meeting the needs of adolescents living with
- 44 HIV through home based care: Lessons learned from Tanzania. *Children and Youth Services Review*.
- 45 2014;45:137-42.
- 46 73. Rana Y, Haberer J, Huang H, Kambugu A, Mukasa B, Thirumurthy H, et al. Short message
- 47 service (SMS)-based intervention to improve treatment adherence among HIV-positive youth in
- 48 Uganda: focus group findings. *PloS one*. 2015;10(4):e0125187.
- 49 74. Madiba S, Mokgatle M. "Students want HIV testing in schools" a formative evaluation of the
- 50 acceptability of HIV testing and counselling at schools in Gauteng and North West provinces in South
- 51 Africa. *BMC Public Health*. 2015;15(1):1-9.
- 52 75. Shanaube K, Schaap A, Chaila MJ, Floyd S, Mackworth-Young C, Hoddinott G, et al.
- 53 Community intervention improves knowledge of HIV status of adolescents in Zambia: findings from
- 54 HPTN 071-PopART for youth study. *Aids*. 2017;31 Suppl 3(Suppl 3):S221-s32.
- 55
- 56
- 57
- 58
- 59
- 60



- 1
- 2
- 3
- 4 76. Hector J, Davies MA, Dekker-Boersema J, Aly MM, Abdalad CCA, Langa EBR, et al.
- 5 Acceptability and performance of a directly assisted oral HIV self-testing intervention in adolescents
- 6 in rural Mozambique. *Plos One*. 2018;13(4).
- 7 77. Hoque ME, Ghuman S, Van Hal G. Human Papillomavirus Vaccination Acceptability among
- 8 Female University Students in South Africa. *Asian Pacific Journal of Cancer Prevention*.
- 9 2013;14(8):4865-9.
- 10 78. Khoza N, Stadler J, MacPhail C, Chikandiwa A, Brahmbhatt H, Delany-Moretlwe S. Cash
- 11 transfer interventions for sexual health: meanings and experiences of adolescent males and females
- 12 in inner-city Johannesburg. *BMC Public Health*. 2018;18:1-N.PAG.
- 13 79. Mavhu W, Hatzold K, Madidi N, Maponga B, Dhlamini R, Munjoma M, et al. Is the PrePex
- 14 device an alternative for surgical male circumcision in adolescents ages 13-17 years? Findings from
- 15 routine service delivery during active surveillance in Zimbabwe. *Plos One*. 2019;14(3).
- 16 80. Nuwasiima A, Nuwamanya E, Babigumira JU, Nalwanga R, Asiimwe FT, Babigumira JB.
- 17 Acceptability and utilization of family planning benefits cards by youth in slums in Kampala, Uganda.
- 18 *Contraception and reproductive medicine*. 2019;4:10.
- 19 81. Cover J, Lim J, Namagembe A, Tumusiime J, Drake JK, Cox CM. Acceptability of Contraceptive
- 20 Self-Injection with-DMPA-SC Among Adolescents in Gulu District, Uganda. *International Perspectives*
- 21 *on Sexual and Reproductive Health*. 2017;43(4):153-62.
- 22 82. Struthers A, Charette C, Bapuji SB, Winters S, Ye X, Metge C, et al. The acceptability of e-
- 23 mental health services for children, adolescents, and young adults: a systematic search and review.
- 24 *Canadian Journal of Community Mental Health*. 2015;34(2):1-21.
- 25 83. Nat Hum Behav. The importance of no evidence. 2019;3:197.
- 26 84. Mlinarić A, Horvat M, Šupak Smolčić V. Dealing with the positive publication bias: Why you
- 27 should really publish your negative results. *Biochem Med*. 2017;27(3):030201.
- 28 85. Archibald D, Patterson R, Haraldsdottir E, Hazelwood M, Fife S, Murray SA. Mapping the
- 29 progress and impacts of public health approaches to palliative care: a scoping review protocol. *BMJ*
- 30 *open*. 2016;6(7):e012058.
- 31 86. James K, Randall N, Haddaway N. A methodology for systematic mapping in environmental
- 32 sciences. *Environmental Evidence* 2016; 5: 7.
- 33 87. Grant MJ, Booth A. A typology of reviews: an analysis of 14 review types and associated
- 34 methodologies. *Health information and libraries journal*. 2009;26(2):91-108.
- 35 88. Cordova D, Alers-Rojas F, Lua FM, Bauermeister J, Nurenberg R, Ovadje L, et al. The Usability
- 36 and Acceptability of an Adolescent mHealth HIV/STI and Drug Abuse Preventive Intervention in
- 37 Primary Care. *Behav Med*. 2018;44(1):36-47.
- 38 89. Schleider JL, Dobias M, Sung J, Mumper E, Mullarkey MC. Acceptability and Utility of an
- 39 Open-Access, Online Single-Session Intervention Platform for Adolescent Mental Health. *JMIR Ment*
- 40 *Health*. 2020;7(6):e20513.
- 41 90. Belzer ME, Kolmodin MacDonell K, Clark LF, Huang J, Olson J, Kahana SY, et al. Acceptability
- 42 and feasibility of a cell phone support intervention for youth living with HIV with nonadherence to
- 43 antiretroviral therapy. *AIDS Patient Care STDS*. 2015;29(6):338-45.
- 44 91. Ranney ML, Choo EK, Cunningham RM, Spirito A, Thorsen M, Mello MJ, et al. Acceptability,
- 45 language, and structure of text message-based behavioral interventions for high-risk adolescent
- 46 females: a qualitative study. *Journal of Adolescent Health*. 2014;55(1):33-40.
- 47 92. Callahan DG, Garabedian LF, Harney KF, DiVasta AD. Will it hurt? The intrauterine device
- 48 insertion experience and long-term acceptability among adolescents and young women. *Journal of*
- 49 *pediatric and adolescent gynecology*. 2019;32(6):615-21.
- 50 93. Yankah E, Mohamed O, Wringe A, Afaneh O, Saleh M, Speed O, et al. Feasibility and
- 51 acceptability of mobile phone platforms to deliver interventions to address gender-based violence
- 52 among Syrian adolescent girls and young women in Izmir, Turkey. *Vulnerable children and youth*
- 53 *studies*. 2020;15(2):133-43.
- 54
- 55
- 56
- 57
- 58
- 59
- 60



- 1
- 2
- 3
- 4 94. World Health Organization. WHO guideline: recommendations on digital interventions for
- 5 health system strengthening: World Health Organization; 2019.
- 6 95. Unicef. Beyond Masks: Societal impacts of COVID-19 and accelerated solutions for children
- 7 and adolescents. 2020.
- 8 96. Boydell KM, Hodgins M, Pignatiello A, Teshima J, Edwards H, Willis D. Using technology to
- 9 deliver mental health services to children and youth: a scoping review. *J Can Acad Child Adolesc*
- 10 *Psychiatry*. 2014;23(2):87-99.
- 11 97. Jolly S, Oosterhoff P, Faith B, Braeken D, Shephard K. A Review of the Evidence: Sexuality
- 12 Education for Young People in Digital Spaces. 2020.
- 13 98. Keeley B, Little C. The State of the Worlds Children 2017: Children in a Digital World: ERIC;
- 14 2017.
- 15 99. Gunnlaugsson G, Whitehead TA, Baboudóttir FNd, Baldé A, Jandi Z, Boiro H, et al. Use of
- 16 Digital Technology among Adolescents Attending Schools in Bissau, Guinea-Bissau. *International*
- 17 *Journal of Environmental Research and Public Health*. 2020;17(23):8937.
- 18 100. Sam-Agudu NA, Folayan MO, Ezeanolue EE. Seeking wider access to HIV testing for
- 19 adolescents in sub-Saharan Africa. *Pediatric research*. 2016;79(6):838-45.
- 20 101. Reif LK, Abrams EJ, Arpadi S, Elul B, McNairy ML, Fitzgerald DW, et al. Interventions to
- 21 Improve Antiretroviral Therapy Adherence Among Adolescents and Youth in Low- and Middle-
- 22 Income Countries: A Systematic Review 2015–2019. *AIDS and Behavior*. 2020;24(10):2797-810.
- 23 102. Cislighi B, Shakya H. Social Norms and Adolescents' Sexual Health: An Introduction for
- 24 Practitioners Working in Low and Mid-income African countries. *African journal of reproductive*
- 25 *health*. 2018;22(1):38-46.
- 26 103. Sanchez EK, Speizer IS, Tolley E, Calhoun LM, Barrington C, Olumide AO. Influences on
- 27 seeking a contraceptive method among adolescent women in three cities in Nigeria. *Reproductive*
- 28 *Health*. 2020;17(1):167.
- 29 104. Sisson H, Wilkinson Y. An Integrative Review of the Influences on Decision-Making of Young
- 30 People About Human Papillomavirus Vaccine. *The Journal of School Nursing*. 2019;35(1):39-50.
- 31 105. Karlsson LC, Soveri A, Lewandowsky S, Karlsson L, Karlsson H, Nolvi S, et al. Fearing the
- 32 disease or the vaccine: The case of COVID-19. *Personality and Individual Differences*.
- 33 2021;172:110590.
- 34 106. Sommers M. The outcast majority: War, development, and youth in Africa: University of
- 35 Georgia Press; 2015.
- 36 107. United Nations. The Sustainable Development Goals Report 2019: United Nations; 2019.
- 37 108. Smith J, Whiteside A. The history of AIDS exceptionalism. *J Int AIDS Soc*. 2010;13(47).
- 38 109. Sands P. HIV: from exceptionalism to endgame. *The Lancet* 2018;398:261-2.
- 39 110. Laabes E, Desai R, Zawedde S, Glew R. How much longer will Africa have to depend on
- 40 western nations for support of its capacity-building efforts for biomedical research? *Tropical*
- 41 *medicine & international health : TM & IH*. 2011;16(3):258-62.
- 42 111. Kasprowicz V, Chopera D, Waddilove K, Kasprowicz V, Chopera D, Waddilove K, et al. African-
- 43 led health research and capacity building- is it working? *BMC Public Health*. 2020;20(1104).
- 44 112. Bautista T, James D, Amaro H. Acceptability of mindfulness-based interventions for
- 45 substance use disorder: A systematic review. *Complementary therapies in clinical practice*.
- 46 2019;35:201-7.
- 47 113. Berry N, Lobban F, Emsley R, Bucci S. Acceptability of Interventions Delivered Online and
- 48 Through Mobile Phones for People Who Experience Severe Mental Health Problems: A Systematic
- 49 Review. *Journal of medical Internet research*. 2016;18(5):e121.
- 50
- 51
- 52
- 53
- 54
- 55
- 56
- 57
- 58
- 59
- 60

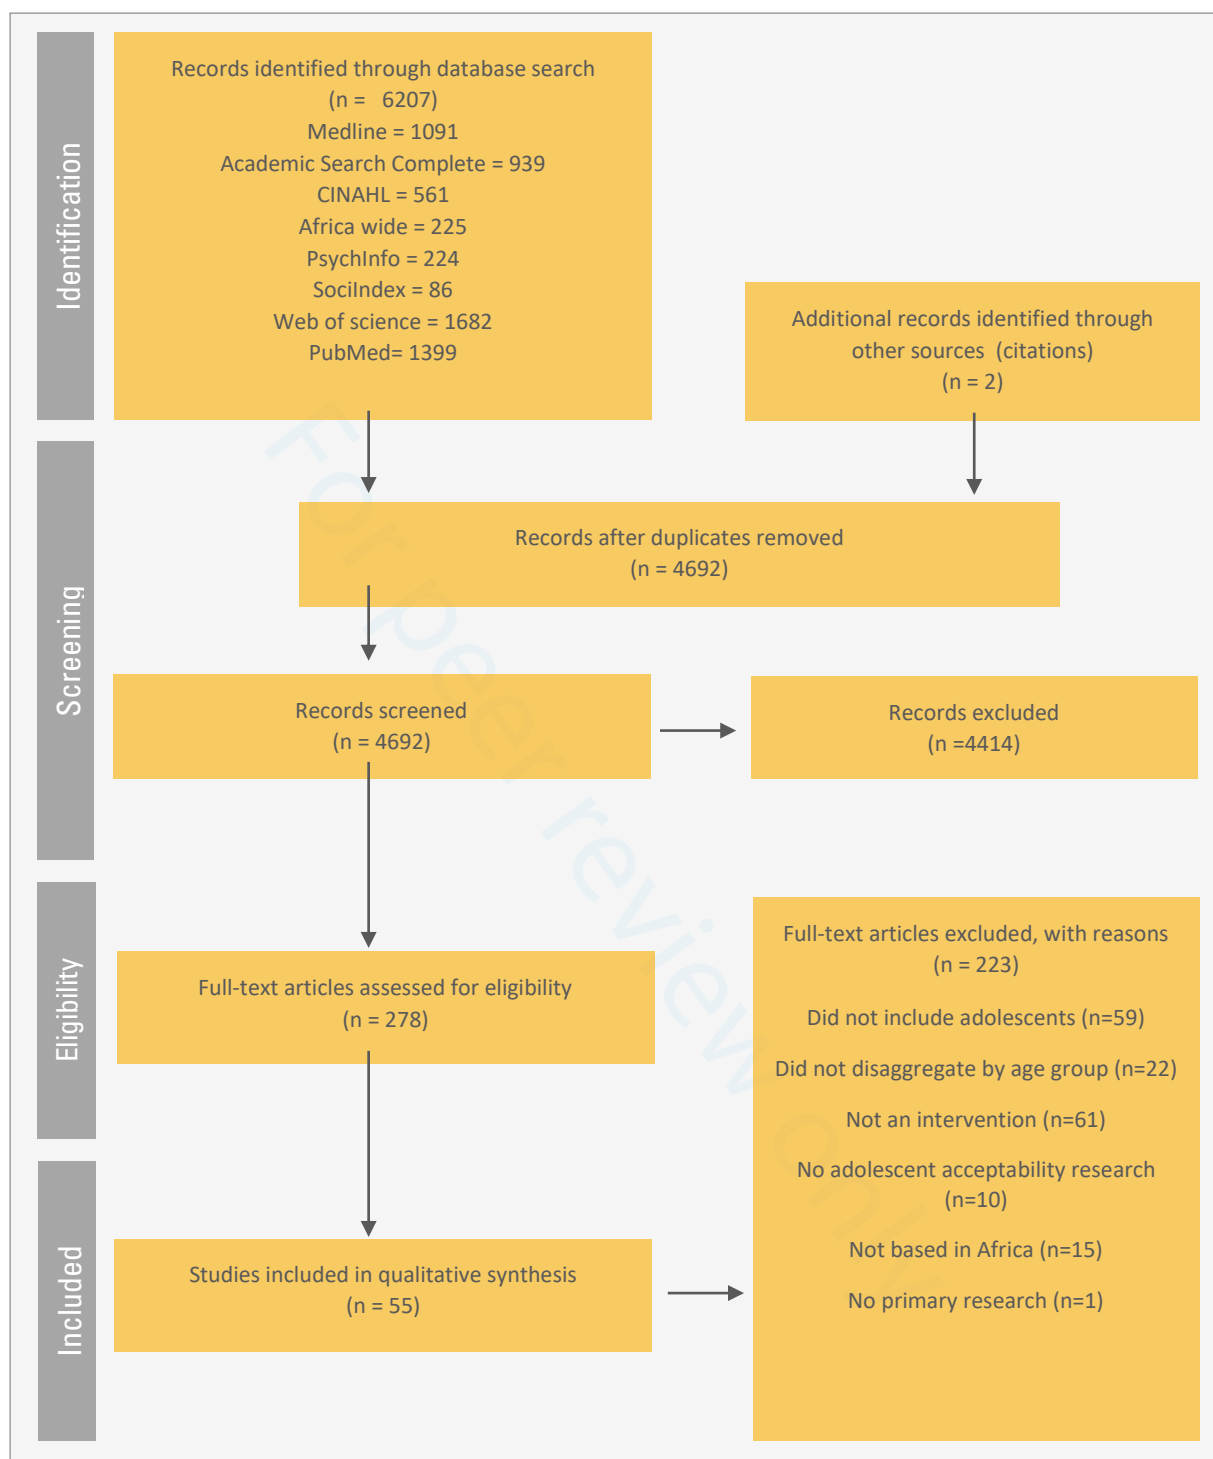

Figure 1: The PRISMA flow diagram describing the process of study selection.

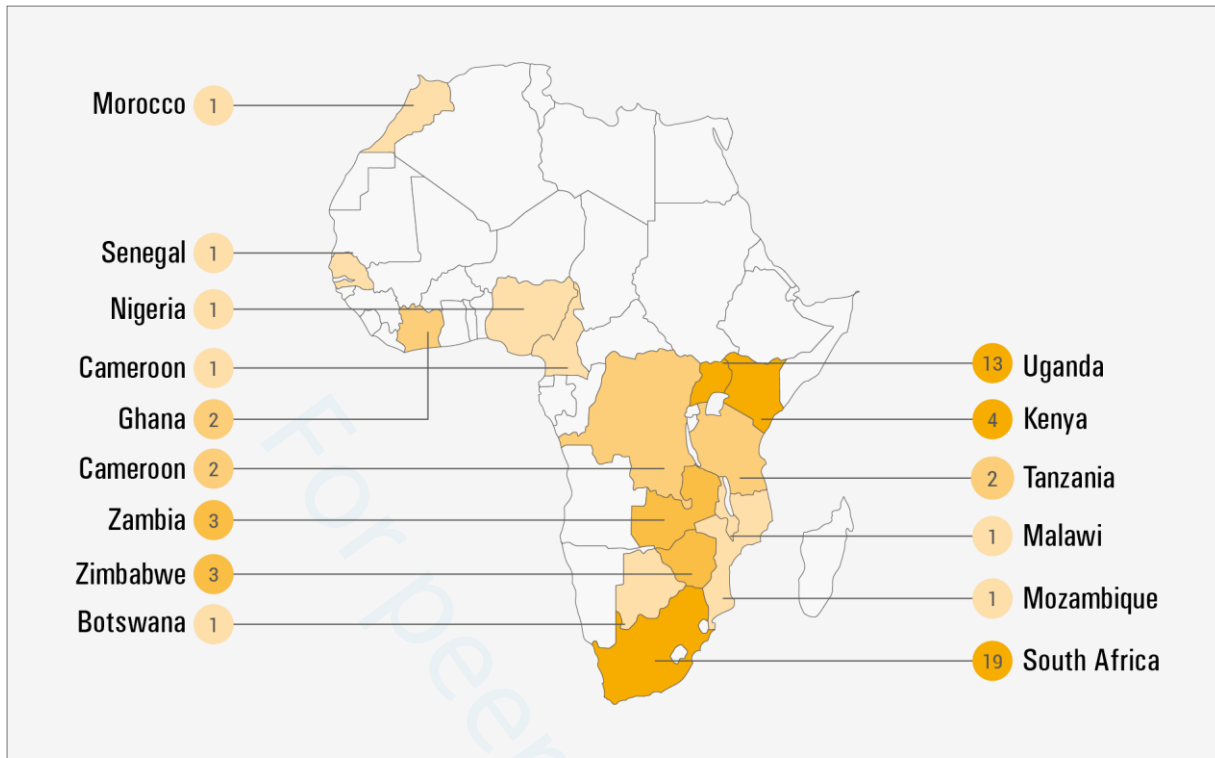

Figure 2: Study Location

1  
2  
3  
4  
5  
6  
7  
8  
9  
10  
11  
12  
13  
14  
15  
16  
17  
18  
19  
20  
21  
22  
23  
24  
25  
26  
27  
28  
29  
30  
31  
32  
33  
34  
35  
36  
37  
38  
39  
40  
41  
42  
43  
44  
45  
46  
47  
48  
49  
50  
51  
52  
53  
54  
55  
56  
57  
58  
59  
60

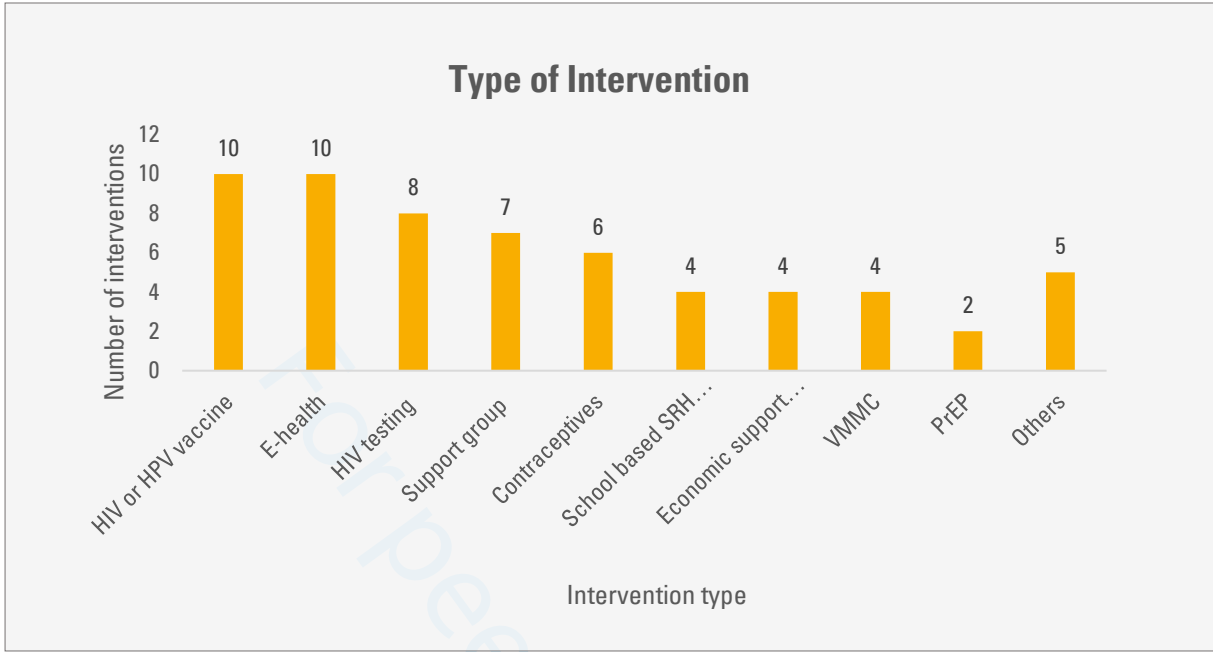

Figure 3: Intervention Types

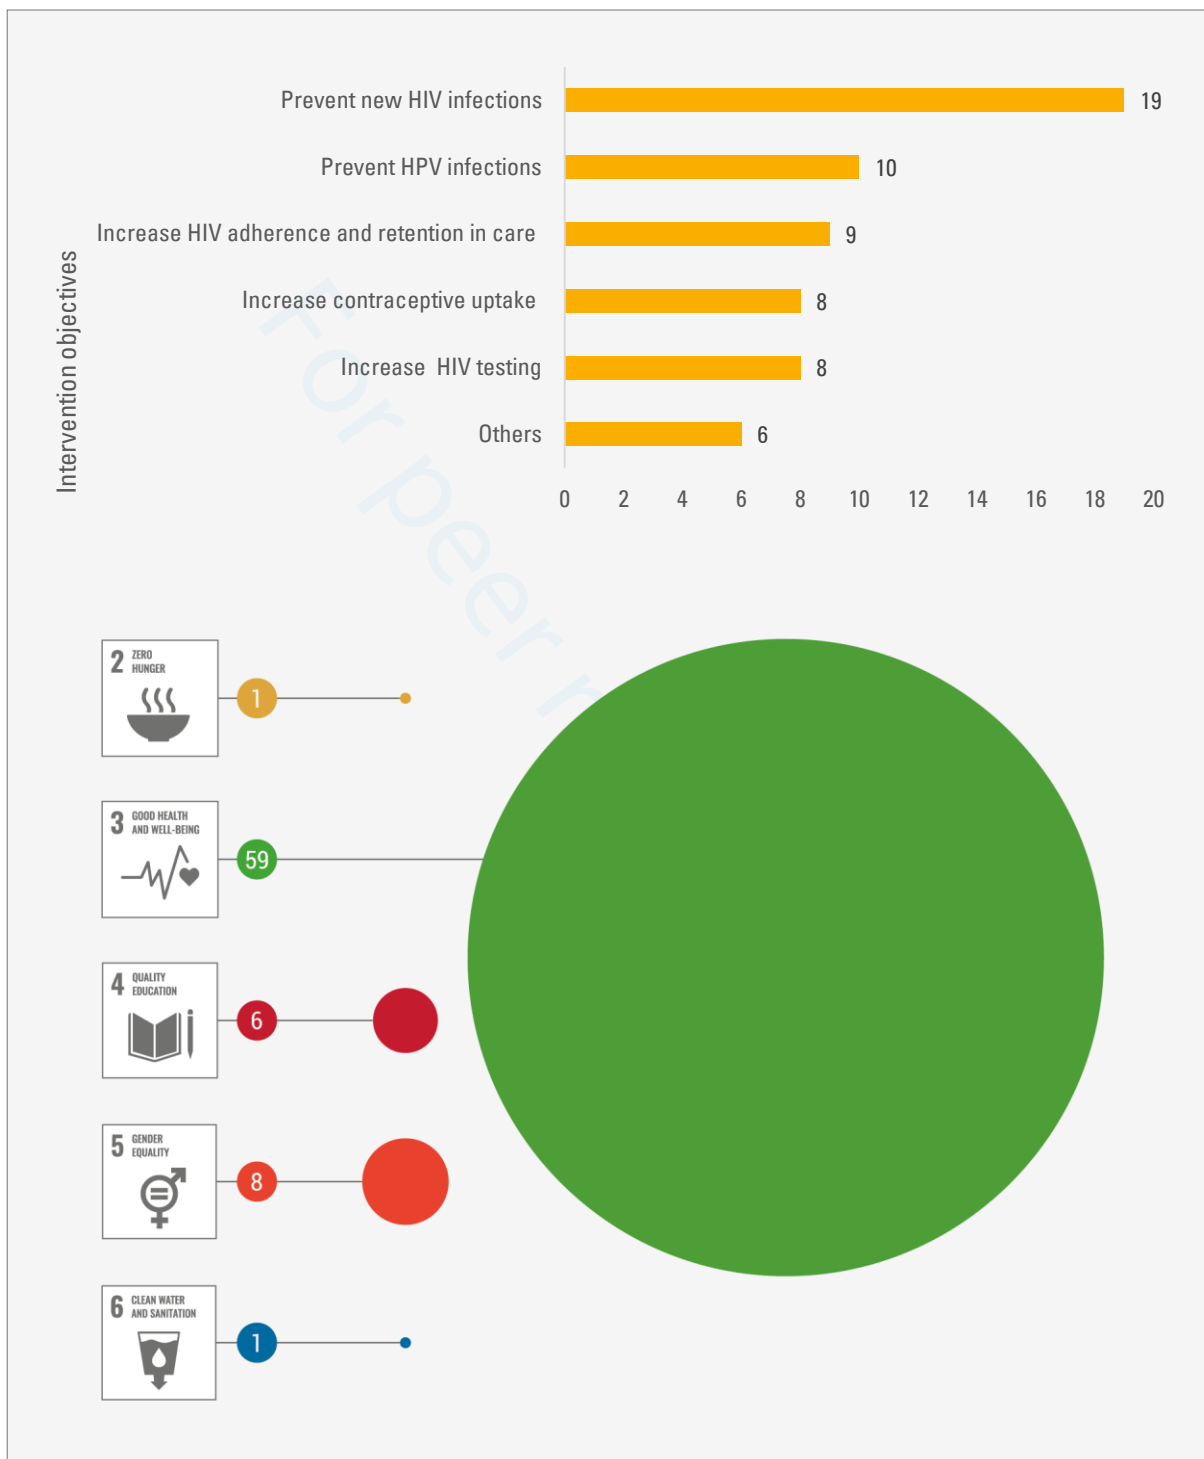

Figure 4: Intervention objectives and number of interventions linked to each SDG

1  
2  
3  
4  
5  
6  
7  
8  
9  
10  
11  
12  
13  
14  
15  
16  
17  
18  
19  
20  
21  
22  
23  
24  
25  
26  
27  
28  
29  
30  
31  
32  
33  
34  
35  
36  
37  
38  
39  
40  
41  
42  
43  
44  
45  
46  
47  
48  
49  
50  
51  
52  
53  
54  
55  
56  
57  
58  
59  
60

Publication Year

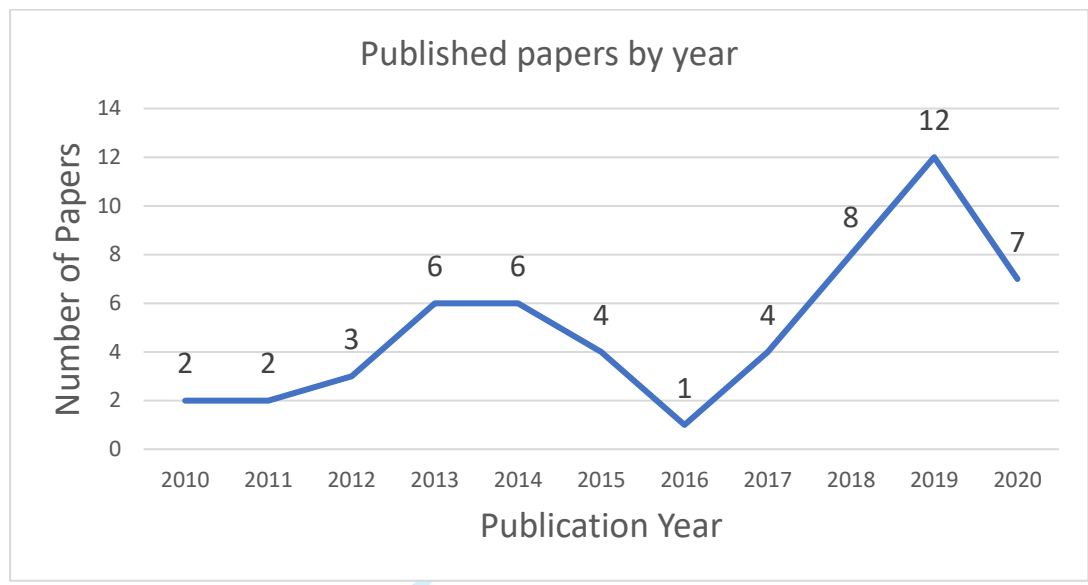

peer review only



**Table S1. Systematic Review Search Strategy**

|                                                                              |                                                                                                                                                                                                                                                                                                                                                                                                                                                                                                                                                                                                                                                                                                                                                                                                                                                                                                                                                                                                                                                                                                                                                                                                                                                                                                                                                                                                                                                                                                                                                                                                                                                                               |
|------------------------------------------------------------------------------|-------------------------------------------------------------------------------------------------------------------------------------------------------------------------------------------------------------------------------------------------------------------------------------------------------------------------------------------------------------------------------------------------------------------------------------------------------------------------------------------------------------------------------------------------------------------------------------------------------------------------------------------------------------------------------------------------------------------------------------------------------------------------------------------------------------------------------------------------------------------------------------------------------------------------------------------------------------------------------------------------------------------------------------------------------------------------------------------------------------------------------------------------------------------------------------------------------------------------------------------------------------------------------------------------------------------------------------------------------------------------------------------------------------------------------------------------------------------------------------------------------------------------------------------------------------------------------------------------------------------------------------------------------------------------------|
| <p>Search criteria (based on the Cochrane Collaboration's PICO criteria)</p> | <p><b>Population:</b> adolescents or youth 10–24 years, living in Africa</p> <p><b>Intervention:</b> primary research to determine adolescent and youth acceptability of one or more interventions aimed at improving their developmental outcomes (as per SDG indicators)</p> <p><b>Comparison:</b> N/A</p> <p><b>Outcomes:</b> adolescent acceptability findings, including: proportion of adolescents that find an intervention acceptable; information on what adolescents consider acceptable or not; reasons given for acceptability or lack of acceptability</p> <p><b>Study or intervention design:</b> all types of study designs; no limiters on methodology</p>                                                                                                                                                                                                                                                                                                                                                                                                                                                                                                                                                                                                                                                                                                                                                                                                                                                                                                                                                                                                    |
| <p>Example search term: search term used for EBSCOhost-linked databases</p>  | <p>Adolescents or Youth: AB ( youth OR “young person” OR “young people” OR “young women” OR “young men” OR “child*” OR “adoles*” OR “young adult” OR “teen*” )</p> <p>AND Acceptability: AB ( acceptable OR acceptability OR co-creat* OR “adolescent engagement” OR “youth engagement” OR “teen* engagement” OR “participant engagement” OR “adolescent participation” OR “youth participation” OR “teen* participation” OR “participant input” OR “adolescent input” OR “youth input” OR “teen* input” OR “participant feedback” OR “adolescent feedback” OR “youth feedback” OR “teen* feedback” OR “participant consultation” OR “adolescent consultation” OR “youth consultation” OR “teen* consultation” OR “participant advisory” OR “adolescent advisory” OR “youth advisory” OR “teen* advisory” OR “participatory research” )</p> <p>AND Africa: AB (Africa* OR Algeria OR Angola OR Benin OR Botswana OR “Burkina Faso” OR Burundi OR Cameroon OR “Canary Islands” OR “Cape Verde” OR “Central African Republic” OR Chad OR Comoros OR Congo OR “Democratic Republic of Congo” OR Djibouti OR Egypt OR “Equatorial Guinea” OR Eritrea OR Ethiopia OR Gabon OR Gambia OR Ghana OR Guinea OR “Guinea Bissau” OR “Ivory Coast” OR “Cote d’Ivoire” OR Jamahiriya OR Jamahiryia OR Kenya OR Lesotho OR Liberia OR Libya OR Libia OR Madagascar OR Malawi OR Mali OR Mauritania OR Mauritius OR Mayote OR Morocco OR Mozambique OR Mocambique OR Namibia OR Niger OR Nigeria OR Principe OR Reunion OR Rwanda OR “Sao Tome” OR Senegal OR Seychelles OR “Sierra Leone” OR Somalia OR “St Helena” OR Sudan OR Swaziland OR Eswatini OR Tanzania OR Togo OR Tunisia OR</p> |

|                    |                                                                                                                                                        |
|--------------------|--------------------------------------------------------------------------------------------------------------------------------------------------------|
|                    | Uganda OR “Western Sahara” OR Zaire OR Zambia OR Zimbabwe)<br>NOT (“guinea pig” OR “guinea pigs” OR “aspergillus niger” OR<br>“African American”)      |
| Databases searched | Web of Science, Medline, PsychInfo, SocilIndex, CINAHL, Africa-wide,<br>Academic Search Complete and PubMed                                            |
| Limiters           | <ul style="list-style-type: none"><li>- Published between 1 January 2010 and 30 June 2020</li><li>- Peer-reviewed</li><li>- English language</li></ul> |

For peer review only

| Authors                  | Title                                           | Publication year |
|--------------------------|-------------------------------------------------|------------------|
| Atujuna et al            | Contexts of vulnerability and the acceptability | 2018             |
| Ayissi et al             | Awareness, Acceptability and Uptake of Hi       | 2012             |
| Banda et al              | Acceptability of an economic support com        | 2019             |
| Barker et al             | In-clinic adolescent peer group support for     | 2019             |
| Bull et al               | Cyber-Senga: Ugandan youth preferences          | 2010             |
| Busza et al              | Meeting the needs of adolescents living wi      | 2014             |
| Carney et al             | Acceptability and feasibility of a brief subst  | 2020             |
| Cele & Archary           | Acceptability of short text messages to sup     | 2019             |
| Chirwa-Kambole et al     | Acceptability of youth clubs focusing on co     | 2020             |
| Cover et al              | Acceptability of Contraceptive Self-Injectio    | 2017             |
| Dulli, et al             | An Online Support Group Intervention for        | 2018             |
| Exavery et al            | Acceptability of condom promotion and di        | 2012             |
| Ferrand et al            | Perception of Risk of Vertically Acquired HI    | 2011             |
| Giovenco et al           | “The time has arrived”: perceptions of beh      | 2018             |
| Hacking et al            | Peer Mentorship via Mobile Phones for Ne        | 2019             |
| Hector et al             | Acceptability and performance of a directly     | 2018             |
| Herman et al             | Knowledge, Perceptions and Acceptability        | 2013             |
| Hoque et al              | Human Papillomavirus Vaccination Accepta        | 2013             |
| James et al              | Integrated access to care and treatment (I      | 2018             |
| Jayeoba et al            | Acceptability of male circumcision among        | 2012             |
| Kansiime et al           | Menstrual health intervention and school        | 2020             |
| Katahoire et al          | Acceptability of HPV vaccine among young        | 2013             |
| Katz et al               | A Qualitative Analysis of Factors Influencin    | 2013             |
| Khosa, Zulu and Shung-Ki | Acceptability and feasibility of a school-bas   | 2019             |
| Khoza et al              | Cash transfer interventions for sexual heal     | 2018             |
| Kibel et al              | Acceptability of a Pilot Intervention of Volu   | 2018             |
| Knopf et al              | “This is the medicine:” A Kenyan communi        | 2014             |
| Kuo et al                | Acceptability, feasibility, and preliminary ef  | 2020             |
| Laidlaw et al            | Using participatory methods to design an r      | 2017             |
| MacCarthy et al          | A randomized controlled trial study of the      | 2020             |
| MacPhail et al           | Acceptability and feasibility of cash transfe   | 2013             |
| Madiba & Mokgatle        | Students want HIV testing in schools” a for     | 2015             |
| Mavhu et al              | Is the PrePex device an alternative for surg    | 2019             |
| Mburu et al              | Knowledge of Cervical Cancer and Accepta        | 2019             |
| Mitchell et al           | Cell phone usage among adolescents in Ug        | 2011             |
| Niasse et al             | Adherence to ready-to-use food and accep        | 2020             |
| Nuwasiima et al          | Acceptability and utilization of family planr   | 2019             |
| Parker et al             | Feasibility analysis of an evidence-based pc    | 2013             |
| Peltzer et al            | Prevalence and Acceptability of Male Circu      | 2014             |
| Rana et al               | Short Message Service (SMS)-Based Interv        | 2015             |

1  
2  
3  
4  
5  
6  
7  
8  
9  
10  
11  
12  
13  
14  
15  
16  
17  
18  
19  
20  
21  
22  
23  
24  
25  
26  
27  
28  
29  
30  
31  
32  
33  
34  
35  
36  
37  
38  
39  
40  
41  
42  
43  
44  
45  
46  
47  
48  
49  
50  
51  
52  
53  
54  
55  
56  
57  
58  
59  
60

|                         |                                                     |
|-------------------------|-----------------------------------------------------|
| Ritchwood et al         | HIV self-testing: South African young adult: 2019   |
| Sabben et al            | A Smartphone Game to Prevent HIV Amon, 2019         |
| Sayles et al            | Future HIV Vaccine Acceptability Among Yc 2010      |
| Shanaube et al          | Community intervention improves knowlec 2017        |
| Smith et al             | Mobile sexual health services for adolescer 2019    |
| Smith, Wallace & Bekker | Adolescents' experience of a rapid HIV self 2016    |
| Snyder et al            | Preliminary results from Hlanganani (Comii 2014     |
| Tabong et al            | Acceptability and stakeholders perspective 2018     |
| Tonen-Wolyec et al      | Acceptability, feasibility, and individual pre 2019 |
| Turiho et al            | Effect of School-based Human Papillomavii 2014      |
| Turiho, Okello & Muhwez | Perceptions of human papillomavirus vacci 2017      |
| Van der Straten et al   | Feasibility and potential acceptability of thi 2015 |
| Ybarra et al            | Acceptability and feasibility of CyberSenga 2014    |
| Ybarra et al            | Iterative Development of In This toGether, 2020     |
| Zouheir et al           | Knowledge of Human Papillomavirus and A 2015        |

#### NOTES

\* % range included when acceptability was assessed quantitatively through multip

| Country                      | Setting            | Sample size | Sample age range | Sample gender | Number of interventions tested |
|------------------------------|--------------------|-------------|------------------|---------------|--------------------------------|
| South Africa                 | Peri-urban         | 14          | 15-17            | Female & Male | 4                              |
| Cameroon                     | Not stated         | 551         | 14-23            | Female        | 1                              |
| Zambia                       | Rural              | 16          | NA               | Female & Male | 1                              |
| Ghana                        | Not stated         | 35          | 12-19            | Female & Male | 1                              |
| Uganda                       | Urban              | 15          | NA               | Female & Male | 1                              |
| Tanzania                     | Rural & Urban      | 14          | 15-19            | Female & Male | 1                              |
| South Africa                 | Not stated         | 30          | 13-17            | Female & Male | 1                              |
| South Africa                 | Rural and urban    | 100         | 12-19            | Female & Male | 1                              |
| Zambia                       | Rural              | 68          | 13-18            | Female & Male | 1                              |
| Uganda                       | Rural & Urban      | 46          | 15-19            | Female        | 1                              |
| Nigeria                      | Not stated         | 349         | 15-24            | Female & Male | 1                              |
| Tanzania                     | Rural              | 1327        | 10-19            | Female & Male | 1                              |
| Zimbabwe                     | Urban              | 506         | 10-18            | Female & Male | 1                              |
| South Africa                 | Urban towns        | 57          | 16-17            | Female & Male | 1                              |
| South Africa                 | Periurban informal | 110         | 12-25            | Female & Male | 1                              |
| Mozambique                   | Rural              | 496         | 16-20            | Female & Male | 1                              |
| Uganda                       | Urban, peri-urban  | 808         | 12-20            | Female & Male | 1                              |
| South Africa                 | Not stated         | 440         | 20-21            | Female        | 1                              |
| South Africa                 | Peri-urban         | 15          | 15-19            | Female & Male | 1                              |
| Botswana                     | Not stated         | 269         | 13-18            | Male          | 1                              |
| Uganda                       | Periurban          | 369         | 13-21            | Female & Male | 1                              |
| Uganda                       | Not stated         | 422         | 10-15            | Female        | 1                              |
| South Africa                 | Urban              | 201         | 12-19            | Female & Male | 1                              |
| South Africa                 | Rural              | 18          | 16-19            | Female        | 1                              |
| South Africa                 | Urban              | 49          | 16-18            | Female & Male | 1                              |
| Kenya                        | Not stated         | 116         | 12-24            | Male          | 1                              |
| Kenya                        | Semirural          | 13          | 18-24            | Female & Male | 1                              |
| South Africa                 | Urban              | 73          | 13-15            | Female & Male | 1                              |
| Malawi                       | Not stated         | 54          | 15-24            | Female & Male | 1                              |
| Uganda                       | Not stated         | 147         | 15-24            | Female & Male | 1                              |
| South Africa                 | Rural              | 29          | 14-17            | Female        | 1                              |
| South Africa                 | Rural & Urban      | 2741        | 14-19            | Female & Male | 1                              |
| Zimbabwe                     | Not stated         | 618         | 13-17            | Male          | 1                              |
| Kenya                        | Not stated         | 180         | 12-18            | Female        | 3                              |
| Uganda                       | Urban              | 1503        | 12-18            | Female & Male | 1                              |
| Senegal                      | Not stated         | 89          | 12-18            | Female & Male | 1                              |
| Uganda                       | Urban slum         | 142         | 18-24            | Female        | 1                              |
| Democratic Republic of Congo | Not stated         | 13          | 15-24            | Female & Male | 1                              |
| South Africa                 | Urban & Rural      | 1489        | 15-24            | Female & Male | 1                              |
| Uganda                       | Urban              | 39          | 14-24            | Female & Male | 1                              |

1  
2  
3  
4  
5  
6  
7  
8  
9  
10  
11  
12  
13  
14  
15  
16  
17  
18  
19  
20  
21  
22  
23  
24  
25  
26  
27  
28  
29  
30  
31  
32  
33  
34  
35  
36  
37  
38  
39  
40  
41  
42  
43  
44  
45  
46  
47  
48  
49  
50  
51  
52  
53  
54  
55  
56  
57  
58  
59  
60

|               |                      |       |       |               |   |
|---------------|----------------------|-------|-------|---------------|---|
| South Africa  | Rural                | 95    | 18-24 | Female & Male | 1 |
| Kenya         | Not stated           | 30    | 11-14 | Female & Male | 1 |
| South Africa  | Not stated           | 42    | 18-24 | Female & Male | 1 |
| Zambia        | Not stated           | 11175 | 15-19 | Female & Male | 1 |
| South Africa  | Not stated           | 303   | 16-24 | Female & Male | 1 |
| South Africa  | Not stated           | 224   | 16-25 | Female & Male | 1 |
| South Africa  | Peri-urban           | 109   | 16-24 | Female & Male | 1 |
| Ghana         | Urban                | 79    | 12-17 | Female & Male | 1 |
| Democratic Re | Urban                | 628   | 15-19 | Female & Male | 1 |
| Uganda.       | Rural & Urban        | 827   | 9-19  | Female        | 1 |
| Uganda        | Not stated           | 43    | 13-16 | Female        | 1 |
| Zimbabwe      | Not stated           | 45    | 16-21 | Female        | 1 |
| Uganda        | Urban                | 366   | 13-19 | Female & Male | 1 |
| Uganda        | Urban and peri-urban | 376   | 18-22 | Female & Male | 1 |
| Morocco       | Urban                | 688   | 13-17 | Female & Male | 1 |

file questions



| Type of intervention (category)             | Type of intervention (sub-type) | Key objective of intervention   | SDGs     |
|---------------------------------------------|---------------------------------|---------------------------------|----------|
| HIV Vaccine, Contraceptives, HPV Vaccine    | HIV Vaccine, Vaginal            | To prevent new HIV              | 3        |
| HPV Vaccine                                 | HPV Vaccine                     | To prevent HPV infection        | 3        |
| Economic support programs                   | Cash transfers                  | To increase contraceptive use   | 3, 4 & 5 |
| Support group                               | Support group                   | To increase adherence           | 3        |
| eHealth                                     | Internet-based                  | To prevent new HIV              | 3 & 4    |
| Others                                      | Home based Care                 | To increase adherence           | 3        |
| Others                                      | Substance use                   | To reduce the prevalence        | 3        |
| eHealth                                     | SMS-based                       | To increase adherence           | 3        |
| School based sexual and reproductive health | School based sexual health      | To increase contraceptive use   | 3,4 & 5  |
| Contraceptives                              | Injectable contraceptive        | To increase contraceptive use   | 3 & 5    |
| Support group                               | Support group                   | To increase adherence           | 3        |
| Contraceptives                              | Condoms                         | To prevent new HIV              | 3        |
| HIV testing                                 | Provider initiated              | To increase HIV testing         | 3        |
| Other biomedical HIV prevention             | PrEP                            | To prevent new HIV              | 3        |
| eHealth                                     | SMS-based                       | To increase adherence           | 3        |
| HIV testing                                 | Self-testing                    | To increase HIV testing         | 3        |
| School based sexual and reproductive health | School based sexual health      | To increase contraceptive use   | 3,4 & 5  |
| HPV Vaccine                                 | HPV Vaccine                     | To prevent HPV infection        | 3        |
| Support group                               | Support group                   | To increase adherence           | 3        |
| Other biomedical HIV prevention             | VMMC                            | To prevent new HIV              | 3        |
| School based sexual and reproductive health | School based sexual health      | Improving menstrual health      | 6        |
| HPV Vaccine                                 | HPV Vaccine                     | To prevent HPV infection        | 3        |
| HPV Vaccine                                 | HPV Vaccine                     | To prevent HPV infection        | 3        |
| Contraceptives                              | School-based contraceptive      | To increase contraceptive use   | 3 & 5    |
| Economic support programs                   | Cash transfers                  | To prevent new HIV              | 3        |
| Other biomedical HIV prevention             | VMMC                            | To prevent new HIV              | 3        |
| Support group                               | Support group                   | To prevent new HIV              | 3        |
| Support group                               | Support group                   | To reduce HIV risk              | 3        |
| eHealth                                     | SMS-based                       | To provide health information   | 3        |
| eHealth                                     | SMS-based                       | To increase adherence           | 3        |
| Economic support programs                   | Cash transfers                  | To prevent new HIV              | 3        |
| HIV testing                                 | School based                    | To increase HIV testing         | 3        |
| Other biomedical HIV prevention             | VMMC                            | To prevent new HIV              | 3        |
| HPV Vaccine, Cervical cancer                | HPV Vaccine                     | To prevent HPV infection        | 3        |
| eHealth                                     | SMS-based                       | To prevent new HIV              | 3        |
| Others                                      | Nutrition/HIV                   | To reduce malnutrition          | 2&3      |
| Economic support programs                   | Non-cash strategy               | To increase contraceptive use   | 3, 4 & 5 |
| Support group                               | Support group                   | To provide psychosocial support | 3        |
| Other biomedical HIV prevention             | VMMC                            | To prevent new HIV              | 3        |
| eHealth                                     | SMS-based                       | To increase adherence           | 3        |

1  
2  
3  
4  
5  
6  
7  
8  
9  
10  
11  
12  
13  
14  
15  
16  
17  
18  
19  
20  
21  
22  
23  
24  
25  
26  
27  
28  
29  
30  
31  
32  
33  
34  
35  
36  
37  
38  
39  
40  
41  
42  
43  
44  
45  
46  
47  
48  
49  
50  
51  
52  
53  
54  
55  
56  
57  
58  
59  
60

|                              |                     |                     |
|------------------------------|---------------------|---------------------|
| HIV testing                  | Self-testing        | To increase HIV tes |
| eHealth                      | Game-based          | To prevent new HI\3 |
| HIV Vaccine                  | HIV Vaccine         | To prevent new HI\3 |
| HIV testing                  | Home based          | To increase HIV tes |
| HIV testing                  | Mobile clinic       | To increase HIV tes |
| HIV testing                  | Self-testing        | To increase HIV tes |
| Support group                | Support group       | To increase adhere  |
| School based sexual and repr | School based sexi   | To increase contrac |
| HIV testing                  | Self-testing        | To increase HIV tes |
| HPV Vaccine                  | HPV Vaccine         | To prevent HPV inf  |
| HPV Vaccine                  | HPV Vaccine         | To prevent HPV inf  |
| Contraceptives               | Cervical barriers ( | To increase contrac |
| eHealth                      | Internet-based      | To prevent new HI\3 |
| eHealth                      | SMS-based           | To prevent new HI\3 |
| HPV Vaccine                  | HPV Vaccine         | To prevent HPV inf  |

|    | <b>Prospective, concurrent or retrospective acceptability</b> | <b>Explicit definition of acceptability</b> | <b>Conceptual framework used for acceptability</b> | <b>Study design</b> | <b>Methods used</b> |
|----|---------------------------------------------------------------|---------------------------------------------|----------------------------------------------------|---------------------|---------------------|
| 8  | Prospective                                                   | NA                                          | NA                                                 | Qualitative         | IDIs and FGDs       |
| 9  | Prospective                                                   | NA                                          | NA                                                 | Quantitative        | Survey (Question    |
| 10 | Prospective                                                   | NA                                          | NA                                                 | Quantitative        | Survey (Question    |
| 11 | Concurrent                                                    | NA                                          | NA                                                 | Qualitative         | FGDs and IDIs       |
| 12 | Concurrent                                                    | NA                                          | NA                                                 | Qualitative         | FGDs                |
| 13 | Concurrent                                                    | NA                                          | NA                                                 | Qualitative         | FGDs                |
| 14 | Concurrent                                                    | NA                                          | NA                                                 | Qualitative         | FGDs                |
| 15 | Retrospective                                                 | NA                                          | NA                                                 | Qualitative         | IDIs                |
| 16 | Retrospective                                                 | NA                                          | NA                                                 | Qualitative         | IDIs                |
| 17 | Prospective                                                   | NA                                          | NA                                                 | Quantitative        | Survey (Question    |
| 18 | Retrospective                                                 | NA                                          | NA                                                 | Qualitative         | FGDs                |
| 19 | Retrospective                                                 | NA                                          | NA                                                 | Qualitative         | IDIs                |
| 20 | Retrospective                                                 | NA                                          | NA                                                 | Qualitative         | IDIs                |
| 21 | Concurrent                                                    | NA                                          | NA                                                 | Qualitative         | IDIs through Face   |
| 22 | Prospective                                                   | NA                                          | NA                                                 | Quantitative        | Survey (Question    |
| 23 | Prospective                                                   | NA                                          | NA                                                 | Quantitative        | Survey (Question    |
| 24 | Concurrent                                                    | NA                                          | NA                                                 | Mixed methods       | Survey (open-enc    |
| 25 | Prospective                                                   | NA                                          | NA                                                 | Mixed methods       | Survey (Question    |
| 26 | Retrospective                                                 | NA                                          | NA                                                 | Qualitative         | IDIs                |
| 27 | Retrospective                                                 | NA                                          | NA                                                 | Qualitative         | IDIs                |
| 28 | Retrospective                                                 | NA                                          | NA                                                 | Quantitative        | Survey (Question    |
| 29 | Prospective                                                   | NA                                          | NA                                                 | Mixed methods       | Survey (Question    |
| 30 | Prospective                                                   | NA                                          | NA                                                 | Quantitative        | Survey (Question    |
| 31 | Prospective                                                   | NA                                          | NA                                                 | Quantitative        | Survey (Question    |
| 32 | Concurrent                                                    | NA                                          | NA                                                 | Qualitative         | IDIs                |
| 33 | Prospective & Ret                                             | NA                                          | NA                                                 | Quantitative        | Survey (structure   |
| 34 | Concurrent                                                    | NA                                          | NA                                                 | Mixed methods       | FGDs and IDIs       |
| 35 | Concurrent                                                    | NA                                          | NA                                                 | Mixed methods       | FGDs and IDIs       |
| 36 | Retrospective                                                 | Willingness or rel                          | NA                                                 | Qualitative         | FGDs                |
| 37 | Retrospective                                                 | NA                                          | NA                                                 | Qualitative         | IDIs                |
| 38 | Prospective                                                   | NA                                          | Social ecological                                  | Qualitative         | FGDs                |
| 39 | Concurrent                                                    | NA                                          | NA                                                 | Qualitative         | IDIs                |
| 40 | Concurrent                                                    | NA                                          | NA                                                 | Qualitative         | IDIs                |
| 41 | Retrospective                                                 | Perception amon                             | NA                                                 | Mixed methods       | FGDs and survey     |
| 42 | Concurrent                                                    | NA                                          | NA                                                 | Qualitative         | FGDs                |
| 43 | Retrospective                                                 | NA                                          | NA                                                 | Quantitative        | Paper satisfactio   |
| 44 | Retrospective                                                 | NA                                          | NA                                                 | Quantitative        | Paper satisfactio   |
| 45 | Prospective                                                   | NA                                          | NA                                                 | Qualitative         | FGDs                |
| 46 | Concurrent                                                    | Cognitive and em                            | Sekhon et al's ac                                  | Mixed methods       | FGDs and Survey     |
| 47 | Concurrent                                                    | NA                                          | NA                                                 | Mixed methods       | FGDs and Survey     |
| 48 | Concurrent                                                    | NA                                          | NA                                                 | Mixed methods       | FGDs and Survey     |
| 49 | Prospective                                                   | NA                                          | NA                                                 | Quantitative        | Survey (Question    |
| 50 | Retrospective                                                 | NA                                          | NA                                                 | Quantitative        | Survey (Question    |
| 51 | Prospective & Ret                                             | NA                                          | NA                                                 | Quantitative        | Survey (Question    |
| 52 | Prospective & Ret                                             | NA                                          | NA                                                 | Quantitative        | Survey (Question    |
| 53 | Prospective                                                   | NA                                          | NA                                                 | Quantitative        | Survey (Question    |
| 54 | Concurrent                                                    | NA                                          | NA                                                 | Mixed methods       | FGDs and survey     |
| 55 | Concurrent                                                    | NA                                          | NA                                                 | Quantitative        | Survey (Question    |
| 56 | Concurrent                                                    | NA                                          | NA                                                 | Quantitative        | Survey (Question    |
| 57 | Concurrent                                                    | How the intende                             | Bowen Feasibility                                  | Mixed methods       | FGDs, activity she  |
| 58 | Prospective                                                   | NA                                          | NA                                                 | Quantitative        | Survey (Question    |
| 59 | Prospective                                                   | NA                                          | NA                                                 | Mixed methods       | FGDs, structured    |

1  
2  
3  
4  
5  
6  
7  
8  
9  
10  
11  
12  
13  
14  
15  
16  
17  
18  
19  
20  
21  
22  
23  
24  
25  
26  
27  
28  
29  
30  
31  
32  
33  
34  
35  
36  
37  
38  
39  
40  
41  
42  
43  
44  
45  
46  
47  
48  
49  
50  
51  
52  
53  
54  
55  
56  
57  
58  
59  
60

|                   |                   |                   |               |                    |
|-------------------|-------------------|-------------------|---------------|--------------------|
| Prospective & Ret | NA                | NA                | Mixed methods | FGDs; direct obser |
| Concurrent        | Appeal, relevanc  | NA                | Mixed methods | Survey (Audio Co   |
| Prospective       | NA                | Value-expectanc   | Qualitative   | FGDs               |
| Concurrent        | NA                | NA                | Quantitative  | Survey (Househo    |
| Concurrent        | NA                | NA                | Quantitative  | Survey (research   |
| Retrospective     | Preference for us | NA                | Quantitative  | Survey (administ   |
| Prospective & Ret | NA                | NA                | Mixed methods | FGDs, attendanc    |
| Prospective       | NA                | NA                | Qualitative   | FGDs               |
| Prospective & Ret | Consenting to ar  | NA                | Quantitative  | Survey (semi-stru  |
| Prospective & Ret | NA                | NA                | Mixed methods | FGDs and survey    |
| Retrospective     | NA                | Symbolic interact | Qualitative   | FGDs               |
| Retrospective     | NA                | NA                | Mixed methods | FGDs and survey    |
| Concurrent        | NA                | NA                | Mixed methods | FGDs, surveys (ac  |
| Prospective & Ret | NA                | NA                | Mixed methods | FGDs via Facebo    |
| Prospective       | NA                | NA                | Quantitative  | Survey (mix of fa  |

| Indicators and questions                    | Overall acceptability high/low | % adolescents that found the intervention acceptable (if | Other stakeholders for whom acceptability |
|---------------------------------------------|--------------------------------|----------------------------------------------------------|-------------------------------------------|
| FGDs and IDI interview topic guide          | High                           | NA                                                       | Healthcare Workers                        |
| Survey included questions on: parents       | High                           | 76                                                       | NA                                        |
| Semi structured FGDs and IDIs explored      | High                           | NA                                                       | Community gate keepers                    |
| FGD semi structured interview guide         | High                           | NA                                                       | NA                                        |
| FGDs covered: acceptability of topic        | High                           | NA                                                       | NA                                        |
| Topic guides included: open-ended           | Low                            | NA                                                       | Primary caregivers and providers          |
| No questions stated and not verified        | High                           | NA                                                       | Caregivers                                |
| Survey probed whether: participants         | High                           | 65                                                       | NA                                        |
| Semi-structured FGD guide explored          | High                           | NA                                                       | Teachers                                  |
| IDI semi structured interview guide         | High                           | NA                                                       | NA                                        |
| Semi structured IDI guide explored          | High                           | NA                                                       | NA                                        |
| Survey asked whether adolescents            | Low                            | 37                                                       | NA                                        |
| Questionnaire assessed: reasons for         | High                           | 99                                                       | Family members                            |
| Survey questions focused on will            | High                           | 84-90                                                    | Clinical service providers                |
| IDs explored: what participants             | High                           | NA                                                       | NA                                        |
| Post-test questionnaire captured            | High                           | 85                                                       | NA                                        |
| Survey assessed: proportion of participants | High                           | 96                                                       | Teachers                                  |
| The questionnaire covered: behaviour        | High                           | 77                                                       | NA                                        |
| No clear acceptability questions            | High                           | NA                                                       | Facility Managers and support             |
| Structured questionnaires included          | High                           | 75                                                       | Parents/guardians                         |
| Specific acceptability questions            | High                           | NA                                                       | Teachers and parents                      |
| FGDs explored reasons for being             | High                           | NA                                                       | NA                                        |
| Interviews covered: contextual information  | High                           | NA                                                       | Caregivers                                |
| FGD topic guide asked: how participants     | Low                            | NA                                                       | Parents                                   |
| Interviews focused on topics such           | High                           | NA                                                       |                                           |
| The questionnaire consisted of 10           | High                           | 81-99                                                    | NA                                        |
| FGD questions focused on whether            | High                           | NA                                                       | Community leaders                         |
| Participants ranked intervention            | High                           | 100                                                      | Parents                                   |
| FGDs covered: participants opinions         | High                           | NA                                                       | Adults aged 22-50 years from              |
| FGDs covered: whether participants          | High                           | 88-97                                                    | Providers, counsellors, pharmac           |
| FGDs covered: whether participants          | High                           | NA                                                       | Caregivers                                |
| Questionnaire included 2 main               | High                           | 77                                                       | NA                                        |
| Questionnaire items included: reasons       | High                           | 95-97                                                    | NA                                        |
| Through the survey adolescents              | High                           | 64                                                       | NA                                        |
| The questionnaire covered: 1) accept        | High                           | 51-61                                                    | NA                                        |
| The structured questionnaire covered        | High                           | 79-87                                                    | Caregivers                                |
| Survey assessed: willingness to participate | High                           | 93                                                       |                                           |
| FGDs covered satisfaction with topic        | High                           | NA                                                       | Facilitators                              |
| Men and women were asked about              | High                           | 46-61                                                    | NA                                        |
| FGDs covered: general reaction to           | High                           | 97                                                       | NA                                        |

1  
2  
3  
4  
5  
6  
7  
8  
9  
10  
11  
12  
13  
14  
15  
16  
17  
18  
19  
20  
21  
22  
23  
24  
25  
26  
27  
28  
29  
30  
31  
32  
33  
34  
35  
36  
37  
38  
39  
40  
41  
42  
43  
44  
45  
46  
47  
48  
49  
50  
51  
52  
53  
54  
55  
56  
57  
58  
59  
60

|                                        |        |                              |
|----------------------------------------|--------|------------------------------|
| Semi-structured focus group the High   | 80-100 | NA                           |
| The survey included questions on High  | 67-97  | Parents                      |
| Semi-structured FGDs covered: v High   | NA     | NA                           |
| The question was a binary questi High  | 81     | NA                           |
| An 11-item scale, developed from High  | 90     | NA                           |
| 3-item acceptability scale assess High | 90-99  | NA                           |
| Formative phase FGDs explored High     | 85     | NA                           |
| FGD topic guides explored: adole High  | NA     | Ghana Education Service Pro; |
| Survey included questions on: re High  | 95     | Peer educators               |
| FGDs discussed girls' observatio High  | 89-93  | NA                           |
| FGD questions included: underst High   | NA     | Health workers, community l  |
| FGDs explored attitudes about a High   | 71-93  | NA                           |
| Topic guides for FGDs explored: High   | 77-94  | NA                           |
| FGD topics queried issues relate High  | NA     | NA                           |
| Survey included 2 questions to a Low   | 27     | NA                           |



1  
2  
3  
4  
5  
6  
7  
8  
9  
10  
11  
12  
13  
14  
15  
16  
17  
18  
19  
20  
21  
22  
23  
24  
25  
26  
27  
28  
29  
30  
31  
32  
33  
34  
35  
36  
37  
38  
39  
40  
41  
42  
43  
44  
45  
46  
47  
48  
49  
50  
51  
52  
53  
54  
55  
56  
57  
58  
59  
60

ders

rt group facilitators

1 the same 2 villages  
nacist, client rep, and study coordinators

For peer review only

1  
2  
3  
4  
5  
6  
7  
8  
9  
10  
11  
12  
13  
14  
15  
16  
17  
18  
19  
20  
21  
22  
23  
24  
25  
26  
27  
28  
29  
30  
31  
32  
33  
34  
35  
36  
37  
38  
39  
40  
41  
42  
43  
44  
45  
46  
47  
48  
49  
50  
51  
52  
53  
54  
55  
56  
57  
58  
59  
60

gram Managers Heads of Basic Educational Schools Ghana Health Service ASRH Program Mani

leaders, teachers and parents

For peer review only

1  
2  
3  
4  
5  
6  
7  
8  
9  
10  
11  
12  
13  
14  
15  
16  
17  
18  
19  
20  
21  
22  
23  
24  
25  
26  
27  
28  
29  
30  
31  
32  
33  
34  
35  
36  
37  
38  
39  
40  
41  
42  
43  
44  
45  
46  
47  
48  
49  
50  
51  
52  
53  
54  
55  
56  
57  
58  
59  
60

For peer review only

1  
2  
3  
4  
5  
6  
7  
8  
9  
10  
11  
12  
13  
14  
15  
16  
17  
18  
19  
20  
21  
22  
23  
24  
25  
26  
27  
28  
29  
30  
31  
32  
33  
34  
35  
36  
37  
38  
39  
40  
41  
42  
43  
44  
45  
46  
47  
48  
49  
50  
51  
52  
53  
54  
55  
56  
57  
58  
59  
60

agers Population Council Representative Members of Ghana Psychologist Association UNESCO

For peer review only

1  
2  
3  
4  
5  
6  
7  
8  
9  
10  
11  
12  
13  
14  
15  
16  
17  
18  
19  
20  
21  
22  
23  
24  
25  
26  
27  
28  
29  
30  
31  
32  
33  
34  
35  
36  
37  
38  
39  
40  
41  
42  
43  
44  
45  
46  
47  
48  
49  
50  
51  
52  
53  
54  
55  
56  
57  
58  
59  
60

For peer review only

1  
2  
3  
4  
5  
6  
7  
8  
9  
10  
11  
12  
13  
14  
15  
16  
17  
18  
19  
20  
21  
22  
23  
24  
25  
26  
27  
28  
29  
30  
31  
32  
33  
34  
35  
36  
37  
38  
39  
40  
41  
42  
43  
44  
45  
46  
47  
48  
49  
50  
51  
52  
53  
54  
55  
56  
57  
58  
59  
60

○ Representative Teachers

For peer review only



| Type of intervention (sub-type) | Authors                 | Paper Title                       | Publication year |
|---------------------------------|-------------------------|-----------------------------------|------------------|
| HIV Vaccine                     | Sayles et al            | Future HIV Vaccine Acceptability  | 2010             |
| HIV Vaccine                     | Atujuna et al           | Contexts of vulnerability and the | 2018             |
| HPV Vaccine                     | Turiho et al            | Effect of School-based Human P:   | 2014             |
| HPV Vaccine                     | Turiho, Okello & Muhwez | Perceptions of human papilloma    | 2017             |
| HPV Vaccine                     | Zouheir et al           | Knowledge of Human Papilloma      | 2015             |
| HPV Vaccine                     | Mburu et al             | Knowledge of Cervical Cancer an   | 2019             |
| HPV Vaccine                     | Hoque et al             | Human Papillomavirus Vaccinatio   | 2013             |
| HPV Vaccine                     | Ayissi et al            | Awareness, Acceptability and Uç   | 2012             |
| HPV Vaccine                     | Katz et al              | A Qualitative Analysis of Factors | 2013             |
| HPV Vaccine                     | Katahoire et al         | Acceptability of HPV vaccine amc  | 2013             |

1  
2  
3  
4  
5  
6  
7  
8  
9  
10  
11  
12  
13  
14  
15  
16  
17  
18  
19  
20  
21  
22  
23  
24  
25  
26  
27  
28  
29  
30  
31  
32  
33  
34  
35  
36  
37  
38  
39  
40  
41  
42  
43  
44  
45  
46  
47  
48  
49  
50  
51  
52  
53  
54  
55  
56  
57  
58  
59  
60

| Country      | Setting (e.g. urban or rural) | Sample size | Sample age range | Sample gender | Key objective of intervention |
|--------------|-------------------------------|-------------|------------------|---------------|-------------------------------|
| South Africa | Not stated                    | 42          | 18-24            | Male & Female | To prevent new HIV i          |
| South Africa | Peri-urban                    | 14          | 15-17            | Male & Female | To prevent new HIV i          |
| Uganda.      | Rural & Urban                 | 827         | 9-19             | Females       | To prevent HPV infec          |
| Uganda       | Not stated                    | 43          | 13-16            | Females       | To prevent HPV infec          |
| Morocco      | Urban                         | 688         | 13-17            | Male & Female | To prevent HPV infec          |
| Kenya        | Not stated                    | 180         | 12-18            | Females       | To prevent HPV infec          |
| South Africa | Not stated                    | 440         | 20-21            | Females       | To prevent HPV infec          |
| Cameroon     | Not stated                    | 551         | 14-23            | Females       | To prevent HPV infec          |
| South Africa | Urban                         | 201         | 12-19            | Male & Female | To prevent HPV infec          |
| Uganda       | Not stated                    | 422         | 10-15            | Females       | To prevent HPV infec          |

| SDGs | Prospective, concurrent or retrospective acceptability | Explicit definition of acceptability | Conceptual framework used for acceptability | Study design  |
|------|--------------------------------------------------------|--------------------------------------|---------------------------------------------|---------------|
| 3    | Prospective                                            | NA                                   | Value-expectancy an                         | Qualitative   |
| 3    | Prospective                                            | NA                                   | NA                                          | Qualitative   |
| 3    | Prospective & Retro                                    | NA                                   | NA                                          | Mixed methods |
| 3    | Retrospective                                          | NA                                   | Symbolic interaction                        | Qualitative   |
| 3    | Prospective                                            | NA                                   | NA                                          | Quantitative  |
| 3    | Prospective                                            | NA                                   | NA                                          | Quantitative  |
| 3    | Prospective                                            | NA                                   | NA                                          | Quantitative  |
| 3    | Prospective                                            | NA                                   | NA                                          | Quantitative  |
| 3    | Retrospective                                          | NA                                   | NA                                          | Qualitative   |
| 3    | Retrospective                                          | Willingness or relt                  | NA                                          | Qualitative   |

For peer review only

|    | <b>Methods used</b>   | <b>Indicators and questions used</b> | <b>Overall acceptability</b> | <b>% adolescents that found the intervention acceptable (if reported)</b> | <b>Other stakeholders for which acceptability was assessed</b> |
|----|-----------------------|--------------------------------------|------------------------------|---------------------------------------------------------------------------|----------------------------------------------------------------|
| 8  | FGDs                  | Semi-structured FGD                  | High                         | NA                                                                        | NA                                                             |
| 9  | IDIs and FGDs         | FGDs and IDI interview               | High                         | NA                                                                        | Healthcare Workers                                             |
| 10 | FGDs and survey       | FGDs discussed girls'                | High                         | 89-93                                                                     | NA                                                             |
| 11 | FGDs                  | FGD questions included               | High                         | NA                                                                        | Health workers, community                                      |
| 12 | Survey (mix of focus  | Survey included 2 questions          | Low                          | 27                                                                        | NA                                                             |
| 13 | Survey (Questionnaire | Through the survey                   | High                         | 63.6                                                                      | NA                                                             |
| 14 | Survey (Questionnaire | The questionnaire covered            | High                         | 77                                                                        | NA                                                             |
| 15 | Survey (Questionnaire | Survey included questions            | High                         | 76                                                                        | NA                                                             |
| 16 | IDIs                  | Interviews covered                   | High                         | NA                                                                        | Caregivers                                                     |
| 17 | FGDs                  | FGDs explored reasons                | High                         | NA                                                                        | NA                                                             |

1  
2  
3  
4  
5  
6  
7  
8  
9  
10  
11  
12 unity leaders, teachers and parents  
13  
14  
15  
16  
17  
18  
19  
20  
21  
22  
23  
24  
25  
26  
27  
28  
29  
30  
31  
32  
33  
34  
35  
36  
37  
38  
39  
40  
41  
42  
43  
44  
45  
46  
47  
48  
49  
50  
51  
52  
53  
54  
55  
56  
57  
58  
59  
60

For peer review only

1  
2  
3  
4  
5  
6  
7  
8  
9  
10  
11  
12  
13  
14  
15  
16  
17  
18  
19  
20  
21  
22  
23  
24  
25  
26  
27  
28  
29  
30  
31  
32  
33  
34  
35  
36  
37  
38  
39  
40  
41  
42  
43  
44  
45  
46  
47  
48  
49  
50  
51  
52  
53  
54  
55  
56  
57  
58  
59  
60

| Type of intervention (sub-type) | Authors         | Paper Title                                           |
|---------------------------------|-----------------|-------------------------------------------------------|
| Game-based                      | Sabben et al    | A Smartphone Game to Prevent HIV Among                |
| Internet-based                  | Bull et al      | Cyber-Senga: Ugandan youth preferences for conte      |
| Internet-based                  | Ybarra et al    | Acceptability and feasibility of CyberSenga, an Inter |
| SMS-based                       | Laidlaw et al   | Using participatory methods to design an mHealth i    |
| SMS-based                       | Hacking et al   | Diagnosed HIV-Positive Youths in Clinic Care in       |
| SMS-based                       | Mitchell et al  | Cell phone usage among adolescents in Uganda: ac      |
| SMS-based                       | Rana et al      | Short Message Service (SMS)-Based Intervention to     |
| SMS-based                       | Ybarra et al    | Iterative Development of In This toGether, the First  |
| SMS-based                       | Cele & Archary  | Acceptability of short text messages to support tre   |
| SMS-based                       | MacCarthy et al | A randomized controlled trial study of the acceptab   |



| Publication year | Country      | Setting          | Sample size | Sample age range | Sample gender |
|------------------|--------------|------------------|-------------|------------------|---------------|
| 2019             | Kenya        | Not stated       | 30          | 11-14            | Female & Male |
| 2010             | Uganda       | Urban            | 15          | NA               | Female & Male |
| 2014             | Uganda       | Urban            | 366         | 13-19            | Female & Male |
| 2017             | Malawi       | Not stated       | 54          | 15-24            | Female & Male |
| 2019             | South Africa | Periurban inform | 110         | 12-25            | Female & Male |
| 2011             | Uganda       | Urban            | 1503        | 12-18            | Female & Male |
| 2015             | Uganda       | Urban            | 39          | 14-24            | Female & Male |
| 2020             | Uganda       | Urban and periur | 376         | 18-22            | Female & Male |
| 2019             | South Africa | Rural and urban  | 100         | 12-19            | Female & Male |
| 2020             | Uganda       | Not stated       | 147         | 15-24            | Female & Male |

1  
2  
3  
4  
5  
6  
7  
8  
9  
10  
11  
12  
13  
14  
15  
16  
17  
18  
19  
20  
21  
22  
23  
24  
25  
26  
27  
28  
29  
30  
31  
32  
33  
34  
35  
36  
37  
38  
39  
40  
41  
42  
43  
44  
45  
46  
47  
48  
49  
50  
51  
52  
53  
54  
55  
56  
57  
58  
59  
60

| Key objective of intervention | SDGs  | Prospective, concurrent or retrospective acceptability | Explicit definition of acceptability | Conceptual framework used for acceptability |
|-------------------------------|-------|--------------------------------------------------------|--------------------------------------|---------------------------------------------|
| To prevent new HIV ir 3       | 3     | Concurrent                                             | Appeal, relevance,                   | NA                                          |
| To prevent new HIV ir 3 & 4   | 3 & 4 | Concurrent                                             | NA                                   | NA                                          |
| To prevent new HIV ir 3       | 3     | Concurrent                                             | NA                                   | NA                                          |
| To provide health info 3      | 3     | Prospective                                            | NA                                   | NA                                          |
| To increase adherenc 3        | 3     | Retrospective                                          | NA                                   | NA                                          |
| To prevent new HIV ir 3       | 3     | Prospective                                            | NA                                   | NA                                          |
| To increase adherenc 3        | 3     | Prospective                                            | NA                                   | NA                                          |
| To prevent new HIV ir 3       | 3     | Prospective & Re                                       | NA                                   | NA                                          |
| To increase adherenc 3        | 3     | Prospective                                            | NA                                   | NA                                          |
| To increase adherenc 3        | 3     | Concurrent                                             | Cognitive and emot                   | Sekhon et al's acc                          |

| Study design                 | Methods used                   |
|------------------------------|--------------------------------|
| Mixed methods<br>Qualitative | Survey (Audio Comput<br>FGDs   |
| Mixed methods<br>Qualitative | FGDs, surveys (adminis<br>FGDs |
| Qualitative                  | IDIs                           |
| Quantitative                 | Survey (Questionnaire)         |
| Mixed methods                | FGDs, structured surve         |
| Mixed methods                | FGDs via Facebook anc          |
| Quantitative                 | Survey (Questionnaire)         |
| Mixed methods                | FGDs and Survey (Que           |

**Indicators and questions used****Overall  
acceptability**

The survey included questions on: the game's appeal, High  
 FGDs covered: acceptability of the concept of an Internet High  
 experiences with the program, including: likes and High  
 FGDs covered: participants opinion of receiving health in High  
 IDIs explored: what participants understood by the Virtu High  
 The questionnaire covered: 1) actual access of health infc High  
 phone related issues; familiarity and comfort with text High  
 protocol, ideas for the name of the intervention, the High  
 Survey probed whether: participants would be willing to High  
 intervention; how they felt about it; whether they High

| % adolescents that found the intervention acceptable (if reported) | Other stakeholders for which acceptability was assessed          |
|--------------------------------------------------------------------|------------------------------------------------------------------|
| 67-97                                                              | Parents                                                          |
| NA                                                                 | NA                                                               |
| 77-94                                                              | NA                                                               |
| NA                                                                 | Adults aged 22-50 years from the same 2 villages                 |
| NA                                                                 | NA                                                               |
| 51-61                                                              | NA                                                               |
| 97                                                                 | NA                                                               |
| NA                                                                 | NA                                                               |
| 65                                                                 | NA                                                               |
| 88-97                                                              | Providers, counsellors, pharmacist, client rep, and study coordi |

1  
2  
3  
4  
5  
6  
7  
8  
9  
10  
11  
12  
13  
14  
15  
16  
17  
18  
19  
20  
21  
22  
23  
24  
25  
26  
27  
28  
29  
30  
31  
32  
33  
34  
35  
36  
37  
38  
39  
40  
41  
42  
43  
44  
45  
46  
47  
48  
49  
50  
51  
52  
53  
54  
55  
56  
57  
58  
59  
60

inators

For peer review only

| Type of intervention<br>(sub-type) | Authors             | Paper Title                     | Publication<br>year |
|------------------------------------|---------------------|---------------------------------|---------------------|
| Self-testing                       | Smith, Wallace & Be | Adolescents' experience of      | 2016                |
| Self-testing                       | Ritchwood et al     | HIV self-testing: South Africa  | 2019                |
| Self-testing                       | Hector et al        | Acceptability and performan     | 2018                |
| Self-testing                       | Tonen-Wolyec et al  | Acceptability, feasibility, and | 2019                |
| Home based                         | Shanaube et al      | Community intervention imp      | 2017                |
| School based                       | Madiba & Mokgatle   | Students want HIV testing in    | 2015                |
| Mobile clinic                      | Smith et al         | Mobile sexual health service    | 2019                |
| Provider initiated                 | Ferrand et al       | Perception of Risk of Vertica   | 2011                |



1  
2  
3  
4  
5  
6  
7  
8  
9  
10  
11  
12  
13  
14  
15  
16  
17  
18  
19  
20  
21  
22  
23  
24  
25  
26  
27  
28  
29  
30  
31  
32  
33  
34  
35  
36  
37  
38  
39  
40  
41  
42  
43  
44  
45  
46  
47  
48  
49  
50  
51  
52  
53  
54  
55  
56  
57  
58  
59  
60

| Country                | Setting (e.g. urban or rural) | Sample size | Sample age range |
|------------------------|-------------------------------|-------------|------------------|
| South Africa           | Not stated                    | 224         | 16-25            |
| South Africa           | Rural                         | 95          | 18-24            |
| Mozambique             | Rural                         | 496         | 16-20            |
| Democratic Republic of | Urban                         | 628         | 15-19            |
| Zambia                 | Not stated                    | 11175       | 15-19            |
| South Africa           | Rural & Urban                 | 2741        | 14-19            |
| South Africa           | Not stated                    | 303         | 16-24            |
| Zimbabwe               | Urban                         | 506         | 10-18            |

| Sample gender | Key objective of intervention | SDGs | Prospective, concurrent or retrospective acceptability | Explicit definition of acceptability |
|---------------|-------------------------------|------|--------------------------------------------------------|--------------------------------------|
| Male & Female | To increase HIV testing       | 3    | Retrospective                                          | Preference for using                 |
| Male & Female | To increase HIV testing       | 3    | Prospective & Retro                                    | NA                                   |
| Male & Female | To increase HIV testing       | 3    | Retrospective                                          | NA                                   |
| Male & Female | To increase HIV testing       | 3    | Prospective & Retro                                    | Consenting to and u:                 |
| Male & Female | To increase HIV testing       | 3    | Concurrent                                             | NA                                   |
| Male & Female | To increase HIV testing       | 3    | Prospective                                            | NA                                   |
| Male & Female | To increase HIV testing       | 3    | Concurrent                                             | NA                                   |
| Male & Female | To increase HIV testing       | 3    | Concurrent                                             | NA                                   |

For peer review only

|    | <b>Conceptual framework used for acceptability</b> | <b>Study design</b> | <b>Methods used</b>                    | <b>Indicators and questions used</b> |
|----|----------------------------------------------------|---------------------|----------------------------------------|--------------------------------------|
| 1  |                                                    |                     |                                        |                                      |
| 2  |                                                    |                     |                                        |                                      |
| 3  |                                                    |                     |                                        |                                      |
| 4  |                                                    |                     |                                        |                                      |
| 5  |                                                    |                     |                                        |                                      |
| 6  |                                                    |                     |                                        |                                      |
| 7  |                                                    |                     |                                        |                                      |
| 8  | NA                                                 | Quantitative        | Survey (administered 3-item acceptabil |                                      |
| 9  | NA                                                 | Mixed methods       | FGDs; direct observat                  | Semi-structured f                    |
| 10 | NA                                                 | Quantitative        | Survey (Questionnaire)                 | Post-test questio                    |
| 11 | NA                                                 | Quantitative        | Survey (semi-structur                  | Survey included c                    |
| 12 | NA                                                 | Quantitative        | House-hold survey                      | The question was                     |
| 13 | NA                                                 | Quantitative        | Survey (Questionnaire)                 | Questionnaire inc                    |
| 14 | NA                                                 | Quantitative        | Survey (researcher ac                  | An 11-item scale, i                  |
| 15 | NA                                                 | Mixed methods       | Open-ended question                    | Questionnaire as                     |
| 16 |                                                    |                     |                                        |                                      |
| 17 |                                                    |                     |                                        |                                      |
| 18 |                                                    |                     |                                        |                                      |
| 19 |                                                    |                     |                                        |                                      |
| 20 |                                                    |                     |                                        |                                      |
| 21 |                                                    |                     |                                        |                                      |
| 22 |                                                    |                     |                                        |                                      |
| 23 |                                                    |                     |                                        |                                      |
| 24 |                                                    |                     |                                        |                                      |
| 25 |                                                    |                     |                                        |                                      |
| 26 |                                                    |                     |                                        |                                      |
| 27 |                                                    |                     |                                        |                                      |
| 28 |                                                    |                     |                                        |                                      |
| 29 |                                                    |                     |                                        |                                      |
| 30 |                                                    |                     |                                        |                                      |
| 31 |                                                    |                     |                                        |                                      |
| 32 |                                                    |                     |                                        |                                      |
| 33 |                                                    |                     |                                        |                                      |
| 34 |                                                    |                     |                                        |                                      |
| 35 |                                                    |                     |                                        |                                      |
| 36 |                                                    |                     |                                        |                                      |
| 37 |                                                    |                     |                                        |                                      |
| 38 |                                                    |                     |                                        |                                      |
| 39 |                                                    |                     |                                        |                                      |
| 40 |                                                    |                     |                                        |                                      |
| 41 |                                                    |                     |                                        |                                      |
| 42 |                                                    |                     |                                        |                                      |
| 43 |                                                    |                     |                                        |                                      |
| 44 |                                                    |                     |                                        |                                      |
| 45 |                                                    |                     |                                        |                                      |
| 46 |                                                    |                     |                                        |                                      |
| 47 |                                                    |                     |                                        |                                      |
| 48 |                                                    |                     |                                        |                                      |
| 49 |                                                    |                     |                                        |                                      |
| 50 |                                                    |                     |                                        |                                      |
| 51 |                                                    |                     |                                        |                                      |
| 52 |                                                    |                     |                                        |                                      |
| 53 |                                                    |                     |                                        |                                      |
| 54 |                                                    |                     |                                        |                                      |
| 55 |                                                    |                     |                                        |                                      |
| 56 |                                                    |                     |                                        |                                      |
| 57 |                                                    |                     |                                        |                                      |
| 58 |                                                    |                     |                                        |                                      |
| 59 |                                                    |                     |                                        |                                      |
| 60 |                                                    |                     |                                        |                                      |

| Overall acceptability | % adolescents that found the intervention acceptable (if reported) | Other stakeholders for which acceptability was assessed |
|-----------------------|--------------------------------------------------------------------|---------------------------------------------------------|
| High                  | 90-99                                                              | NA                                                      |
| High                  | 80-100                                                             | NA                                                      |
| High                  | 85                                                                 | NA                                                      |
| High                  | 95                                                                 | Peer educators                                          |
| High                  | 81                                                                 | NA                                                      |
| High                  | 77                                                                 | NA                                                      |
| High                  | 90                                                                 | NA                                                      |
| High                  | 99                                                                 | Family members                                          |

For peer review only

1  
2  
3  
4  
5  
6  
7  
8  
9  
10  
11  
12  
13  
14  
15  
16  
17  
18  
19  
20  
21  
22  
23  
24  
25  
26  
27  
28  
29  
30  
31  
32  
33  
34  
35  
36  
37  
38  
39  
40  
41  
42  
43  
44  
45  
46  
47  
48  
49  
50  
51  
52  
53  
54  
55  
56  
57  
58  
59  
60

1  
2  
3  
4  
5  
6  
7  
8  
9  
10  
11  
12  
13  
14  
15  
16  
17  
18  
19  
20  
21  
22  
23  
24  
25  
26  
27  
28  
29  
30  
31  
32  
33  
34  
35  
36  
37  
38  
39  
40  
41  
42  
43  
44  
45  
46  
47  
48  
49  
50  
51  
52  
53  
54  
55  
56  
57  
58  
59  
60

| <b>Authors</b> | <b>Paper Title</b>                     | <b>Publication year</b> | <b>Country</b>   |
|----------------|----------------------------------------|-------------------------|------------------|
| Barker et al   | In-clinic adolescent peer group sup    | 2019                    | Ghana            |
| Dulli, et al   | An Online Support Group Intervent      | 2018                    | Nigeria          |
| Snyder et al   | Preliminary results from Hlanganan     | 2014                    | South Africa     |
| Knopf et al    | “This is the medicine:” A Kenyan cc    | 2014                    | Kenya            |
| Parker et al   | Feasibility analysis of an evidence-b  | 2013                    | Democratic Reput |
| Kuo et al      | Acceptability, feasibility, and prelin | 2020                    | South Africa     |
| James et al    | Integrated access to care and treat    | 2018                    | South Africa     |

For peer review only

| Setting (e.g. urban or rural) | Sample size | Sample age range | Sample gender | Key objective of intervention | SDGs |
|-------------------------------|-------------|------------------|---------------|-------------------------------|------|
| Not stated                    | 35          | 12-19            | Male & Female | To increase adherence ar      | 3    |
| Not stated                    | 349         | 15-24            | Male & Female | To increase adherence ar      | 3    |
| Peri-urban                    | 109         | 16-24            | Male & Female | To increase adherence ar      | 3    |
| Semirural                     | 13          | 18-24            | Male & Female | To prevent new HIV infec      | 3    |
| Not stated                    | 13          | 15-24            | Male & Female | To provide psychosocial :     | 3    |
| Urban                         | 73          | 13-15            | Male & Female | To reduce HIV risk behav      | 3    |
| Peri-urban                    | 15          | 15-19            | Male & Female | To increase adherence ar      | 3    |

For peer review only

|    | <b>Prospective, concurrent or retrospective acceptability</b> | <b>Explicit definition of acceptability</b> | <b>Conceptual framework used for acceptability</b> | <b>Study design</b> | <b>Methods used</b>       |
|----|---------------------------------------------------------------|---------------------------------------------|----------------------------------------------------|---------------------|---------------------------|
| 7  | Concurrent                                                    | NA                                          | NA                                                 | Qualitative         | FGDs                      |
| 8  | Concurrent                                                    | NA                                          | NA                                                 | Qualitative         | IDIs through Facebook     |
| 9  | Prospective and Ret                                           | NA                                          | NA                                                 | Mixed methods       | FGDs, attendance regist   |
| 10 | Concurrent                                                    | NA                                          | NA                                                 | Qualitative         | FGDs                      |
| 11 | Concurrent                                                    | How the intend                              | Bowen Feasibilit                                   | Mixed methods       | FGDs, activity sheets/ ev |
| 12 | Retrospective                                                 | NA                                          | NA                                                 | Quantitative        | Survey (Paper satisfactio |
| 13 | Concurrent                                                    | NA                                          | NA                                                 | Qualitative         | IDIs                      |
| 14 |                                                               |                                             |                                                    |                     |                           |
| 15 |                                                               |                                             |                                                    |                     |                           |
| 16 |                                                               |                                             |                                                    |                     |                           |
| 17 |                                                               |                                             |                                                    |                     |                           |
| 18 |                                                               |                                             |                                                    |                     |                           |
| 19 |                                                               |                                             |                                                    |                     |                           |
| 20 |                                                               |                                             |                                                    |                     |                           |
| 21 |                                                               |                                             |                                                    |                     |                           |
| 22 |                                                               |                                             |                                                    |                     |                           |
| 23 |                                                               |                                             |                                                    |                     |                           |
| 24 |                                                               |                                             |                                                    |                     |                           |
| 25 |                                                               |                                             |                                                    |                     |                           |
| 26 |                                                               |                                             |                                                    |                     |                           |
| 27 |                                                               |                                             |                                                    |                     |                           |
| 28 |                                                               |                                             |                                                    |                     |                           |
| 29 |                                                               |                                             |                                                    |                     |                           |
| 30 |                                                               |                                             |                                                    |                     |                           |
| 31 |                                                               |                                             |                                                    |                     |                           |
| 32 |                                                               |                                             |                                                    |                     |                           |
| 33 |                                                               |                                             |                                                    |                     |                           |
| 34 |                                                               |                                             |                                                    |                     |                           |
| 35 |                                                               |                                             |                                                    |                     |                           |
| 36 |                                                               |                                             |                                                    |                     |                           |
| 37 |                                                               |                                             |                                                    |                     |                           |
| 38 |                                                               |                                             |                                                    |                     |                           |
| 39 |                                                               |                                             |                                                    |                     |                           |
| 40 |                                                               |                                             |                                                    |                     |                           |
| 41 |                                                               |                                             |                                                    |                     |                           |
| 42 |                                                               |                                             |                                                    |                     |                           |
| 43 |                                                               |                                             |                                                    |                     |                           |
| 44 |                                                               |                                             |                                                    |                     |                           |
| 45 |                                                               |                                             |                                                    |                     |                           |
| 46 |                                                               |                                             |                                                    |                     |                           |
| 47 |                                                               |                                             |                                                    |                     |                           |
| 48 |                                                               |                                             |                                                    |                     |                           |
| 49 |                                                               |                                             |                                                    |                     |                           |
| 50 |                                                               |                                             |                                                    |                     |                           |
| 51 |                                                               |                                             |                                                    |                     |                           |
| 52 |                                                               |                                             |                                                    |                     |                           |
| 53 |                                                               |                                             |                                                    |                     |                           |
| 54 |                                                               |                                             |                                                    |                     |                           |
| 55 |                                                               |                                             |                                                    |                     |                           |
| 56 |                                                               |                                             |                                                    |                     |                           |
| 57 |                                                               |                                             |                                                    |                     |                           |
| 58 |                                                               |                                             |                                                    |                     |                           |
| 59 |                                                               |                                             |                                                    |                     |                           |
| 60 |                                                               |                                             |                                                    |                     |                           |

For peer review only



| Indicators and questions used | Overall acceptability | % adolescents that found the intervention acceptable (if | Other stakeholders for which acceptability |
|-------------------------------|-----------------------|----------------------------------------------------------|--------------------------------------------|
| FGD semi structur             | High                  | NA                                                       | NA                                         |
| Semi structured I             | High                  | NA                                                       | NA                                         |
| Formative phase F             | High                  | 85                                                       | NA                                         |
| FGD questions foc             | High                  | NA                                                       | Community leaders                          |
| FGDs covered sati:            | High                  | NA                                                       | Facilitators                               |
| Participants ranke            | High                  | 100                                                      | Parents                                    |
| No clear acceptab             | High                  | NA                                                       | Facility Managers and support group        |

For peer review only

1  
2  
3  
4  
5  
6  
7  
8  
9  
10  
11  
12  
13  
14  
15  
16  
17  
18  
19  
20  
21  
22  
23  
24  
25  
26  
27  
28  
29  
30  
31  
32  
33  
34  
35  
36  
37  
38  
39  
40  
41  
42  
43  
44  
45  
46  
47  
48  
49  
50  
51  
52  
53  
54  
55  
56  
57  
58  
59  
60

p facilitators

For peer review only

| Type of intervention (sub-type)                  | Authors                  | Paper Title              |
|--------------------------------------------------|--------------------------|--------------------------|
| Condoms                                          | Exavery et al            | Acceptability of condor  |
| Condoms                                          | Mburu et al              | Knowledge of Cervical    |
| School-based contraceptive clinic (SBCC)         | Khosa, Zulu and Shung-Ki | Acceptability and feasil |
| Injectable contraception                         | Cover et al              | Acceptability of Contra  |
| Cervical barriers (CB) - (Ortho All-Flex® diaphr | Van der Straten et al    | Feasibility and potentia |
| Vaginal rings                                    | Atujuna et al            | Contexts of vulnerabili  |

For peer review only

1  
2  
3  
4  
5  
6  
7  
8  
9  
10  
11  
12  
13  
14  
15  
16  
17  
18  
19  
20  
21  
22  
23  
24  
25  
26  
27  
28  
29  
30  
31  
32  
33  
34  
35  
36  
37  
38  
39  
40  
41  
42  
43  
44  
45  
46  
47  
48  
49  
50  
51  
52  
53  
54  
55  
56  
57  
58  
59  
60

| <b>Publication year</b> | <b>Country</b> | <b>Setting</b> | <b>Sample size</b> | <b>Sample age range</b> | <b>Sample gender</b> |
|-------------------------|----------------|----------------|--------------------|-------------------------|----------------------|
| 2012                    | Tanzania       | Rural          | 1327               | 10-19                   | Male & Female        |
| 2019                    | Kenya          | Not stated     | 180                | 12-18                   | Females              |
| 2019                    | South Africa   | Rural          | 18                 | 16-19                   | Female               |
| 2017                    | Uganda         | Rural & Urban  | 46                 | 15-19                   | Female               |
| 2015                    | Zimbabwe       | Not stated     | 45                 | 16-21                   | Female               |
| 2018                    | South Africa   | Peri-urban     | 14                 | 15-17                   | Male & Female        |

For peer review only

| Key objective of intervention | SDGs  | Prospective, concurrent or retrospective acceptability | Explicit definition | Conceptual framework used for acceptability | Study design  |
|-------------------------------|-------|--------------------------------------------------------|---------------------|---------------------------------------------|---------------|
| To prevent new HIV 3          |       | Prospective                                            | NA                  | NA                                          | Quantitative  |
| To prevent HPV infe 3         |       | Prospective                                            | NA                  | NA                                          | Quantitative  |
| To increase contrac 3 & 5     | 3 & 5 | Prospective                                            | NA                  | Social ecological fi                        | Qualitative   |
| To increase contrac 3 & 5     | 3 & 5 | Retrospective                                          | NA                  | NA                                          | Qualitative   |
| To increase contrac 3 & 5     | 3 & 5 | Retrospective                                          | NA                  | NA                                          | Mixed methods |
| To prevent new HIV 3          |       | Prospective                                            | NA                  | NA                                          | Qualitative   |

For peer review only

|    | <b>Methods used</b>             | <b>Indicators and questions used</b> | <b>Overall acceptability</b> | <b>% adolescents that found the intervention acceptable (if appropriate)</b> |
|----|---------------------------------|--------------------------------------|------------------------------|------------------------------------------------------------------------------|
| 8  | Survey (Questionnaire)          | Survey asked whether                 | Low                          | 37                                                                           |
| 9  | Survey (Questionnaire)          | Through the survey                   | High                         | 64                                                                           |
| 10 | FGDs                            | FGD topic guide asked                | Low                          | NA                                                                           |
| 11 | IDIs                            | IDI semi structured interview        | High                         | NA                                                                           |
| 13 | FGDs and survey (Questionnaire) | FGDs explored attitudes              | High                         | 71-93                                                                        |
| 14 | IDIs and FGDs                   | FGDs and IDI interviews              | High                         | NA                                                                           |

For peer review only

1  
2 **Other stakeholders**  
3 **for which**  
4 **acceptability was**  
5 **assessed**

6  
7 NA

8  
9 NA

10  
11 Parents

12  
13 NA

14  
15 Healthcare workers

16  
17  
18  
19  
20  
21  
22  
23  
24  
25  
26  
27  
28  
29  
30  
31  
32  
33  
34  
35  
36  
37  
38  
39  
40  
41  
42  
43  
44  
45  
46  
47  
48  
49  
50  
51  
52  
53  
54  
55  
56  
57  
58  
59  
60

For peer review only



1  
2  
3  
4  
5  
6  
7  
8  
9  
10  
11  
12  
13  
14  
15  
16  
17  
18  
19  
20  
21  
22  
23  
24  
25  
26  
27  
28  
29  
30  
31  
32  
33  
34  
35  
36  
37  
38  
39  
40  
41  
42  
43  
44  
45  
46  
47  
48  
49  
50  
51  
52  
53  
54  
55  
56  
57  
58  
59  
60

| Authors        | Paper Title            | Publication year | Country | Setting           | Sample size |
|----------------|------------------------|------------------|---------|-------------------|-------------|
| Chirwa-Kambole | Acceptability of youth | 2020             | Zambia  | Rural             | 68          |
| Herman et al   | Knowledge, Percepti    | 2013             | Uganda  | Urban, peri-urbar | 808         |
| Kansiime et al | Menstrual health inte  | 2020             | Uganda  | Periurban         | 369         |
| Tabong et al   | Acceptability and stat | 2018             | Ghana   | Urban             | 79          |

For peer review only

| Sample age range | Sample gender | Key objective of intervention     | SDGs | Prospective, concurrent or retrospective acceptability |
|------------------|---------------|-----------------------------------|------|--------------------------------------------------------|
| 13-18            | Female & Male | To increase contraceptive 3,4 & 5 |      | Retrospective                                          |
| 12-20            | Female & Male | To increase contraceptive 3,4 & 5 |      | Prospective                                            |
| 13-21            | Female & Male | To improve menstruation 6         |      | Concurrent                                             |
| 12-17            | Female & Male | To increase contraceptive 3,4 & 5 |      | Prospective                                            |

For peer review only

1  
2  
3  
4  
5  
6  
7  
8  
9  
10  
11  
12  
13  
14  
15  
16  
17  
18  
19  
20  
21  
22  
23  
24  
25  
26  
27  
28  
29  
30  
31  
32  
33  
34  
35  
36  
37  
38  
39  
40  
41  
42  
43  
44  
45  
46  
47  
48  
49  
50  
51  
52  
53  
54  
55  
56  
57  
58  
59  
60

| <b>Explicit definition of acceptability</b> | <b>Conceptual framework used for acceptability</b> | <b>Study design</b> | <b>Methods used</b>              | <b>Indicators and questions used</b> |
|---------------------------------------------|----------------------------------------------------|---------------------|----------------------------------|--------------------------------------|
| NA                                          | NA                                                 | Qualitative         | FGDs                             | Semi-structured FC                   |
| NA                                          | NA                                                 | Mixed methods       | Survey (QuesSurvey assessed: p   |                                      |
| NA                                          | NA                                                 | Mixed methods       | FGDs and IDI:Specific acceptabil |                                      |
| NA                                          | NA                                                 | Qualitative         | FGDs                             | FGD topic guides e                   |

For peer review only

| Overall acceptability | % adolescents that found the intervention acceptable (if reported) | Other stakeholders for which acceptability was assessed |
|-----------------------|--------------------------------------------------------------------|---------------------------------------------------------|
| High                  | NA                                                                 | Teachers                                                |
| High                  | 96                                                                 | Teachers                                                |
| High                  | NA                                                                 | Teachers and parents                                    |
| High                  | NA                                                                 | Ghana Education Service Program Managers Heads of       |

For peer review only

1  
2  
3  
4  
5  
6  
7  
8  
9  
10  
11  
12  
13  
14  
15  
16  
17  
18  
19  
20  
21  
22  
23  
24  
25  
26  
27  
28  
29  
30  
31  
32  
33  
34  
35  
36  
37  
38  
39  
40  
41  
42  
43  
44  
45  
46  
47  
48  
49  
50  
51  
52  
53  
54  
55  
56  
57  
58  
59  
60

f Basic Educational Schools Ghana Health Service ASRH Program Managers Population Council Rej

For peer review only

1  
2  
3  
4  
5  
6  
7  
8  
9  
10  
11  
12  
13  
14  
15  
16  
17  
18  
19  
20  
21  
22  
23  
24  
25  
26  
27  
28  
29  
30  
31  
32  
33  
34  
35  
36  
37  
38  
39  
40  
41  
42  
43  
44  
45  
46  
47  
48  
49  
50  
51  
52  
53  
54  
55  
56  
57  
58  
59  
60

representative Members of Ghana Psychologist Association UNESCO Representative Teachers

For peer review only

1  
2  
3  
4  
5  
6  
7  
8  
9  
10  
11  
12  
13  
14  
15  
16  
17  
18  
19  
20  
21  
22  
23  
24  
25  
26  
27  
28  
29  
30  
31  
32  
33  
34  
35  
36  
37  
38  
39  
40  
41  
42  
43  
44  
45  
46  
47  
48  
49  
50  
51  
52  
53  
54  
55  
56  
57  
58  
59  
60

For peer review only



| Type of intervention          | Authors         | Paper Title              | Publication year |
|-------------------------------|-----------------|--------------------------|------------------|
| Cash transfers                | Banda et al     | Acceptability of ar 2019 |                  |
| Cash transfers                | Khoza et al     | Cash transfer inte 2018  |                  |
| Cash transfers                | MacPhail et al  | Acceptability and 12013  |                  |
| Family planning benefit cards | Nuwasiima et al | Acceptability and 12019  |                  |

For peer review only

1  
2  
3  
4  
5  
6  
7  
8  
9  
10  
11  
12  
13  
14  
15  
16  
17  
18  
19  
20  
21  
22  
23  
24  
25  
26  
27  
28  
29  
30  
31  
32  
33  
34  
35  
36  
37  
38  
39  
40  
41  
42  
43  
44  
45  
46  
47  
48  
49  
50  
51  
52  
53  
54  
55  
56  
57  
58  
59  
60

| <b>Country</b> | <b>Setting (e.g. urban or rural)</b> | <b>Sample size</b> | <b>Sample age range</b> | <b>Sample gender</b> |
|----------------|--------------------------------------|--------------------|-------------------------|----------------------|
| Zambia         | Rural                                | 16                 | NA                      | Female & Male        |
| South Africa   | Urban                                | 49                 | 16-18                   | Female & Male        |
| South Africa   | Rural                                | 29                 | 14-17                   | Female               |
| Uganda         | Urban slum                           | 142                | 18-24                   | Female               |

For peer review only

| Key objective of intervention | SDGs     | Prospective, concurrent or retrospective acceptability | Explicit definition of acceptability | Conceptual framework used for acceptability |
|-------------------------------|----------|--------------------------------------------------------|--------------------------------------|---------------------------------------------|
| To increase contraceptive     | 3, 4 & 5 | Concurrent                                             | NA                                   | NA                                          |
| To prevent new HIV inf        | 3        | Concurrent                                             | NA                                   | NA                                          |
| To prevent new HIV inf        | 3        | Concurrent                                             | NA                                   | NA                                          |
| To increase contraceptive     | 3, 4 & 5 | Concurrent                                             | NA                                   | NA                                          |

For peer review only

1  
2  
3  
4  
5  
6  
7  
8  
9  
10  
11  
12  
13  
14  
15  
16  
17  
18  
19  
20  
21  
22  
23  
24  
25  
26  
27  
28  
29  
30  
31  
32  
33  
34  
35  
36  
37  
38  
39  
40  
41  
42  
43  
44  
45  
46  
47  
48  
49  
50  
51  
52  
53  
54  
55  
56  
57  
58  
59  
60

| <b>Study design</b> | <b>Methods used</b>    | <b>Indicators and questions used</b> | <b>Overall acceptability</b> | <b>% adolescents that found the intervention acceptable (if</b> |
|---------------------|------------------------|--------------------------------------|------------------------------|-----------------------------------------------------------------|
| Qualitative         | FGDs and IDIs          | Semi structured FGDs                 | High                         | NA                                                              |
| Qualitative         | IDIs                   | Interviews focused on                | High                         | NA                                                              |
| Mixed methods       | FGDs and Survey        | FGDs covered: whether                | High                         | NA                                                              |
| Quantitative        | Survey (Questionnaire) | Survey assessed: will it             | High                         | 93                                                              |

For peer review only

1  
2 **Other stakeholders**  
3 **for which**  
4 **acceptability was**  
5 **assessed**

7 Community gate keepers

8 NA

9 Caregivers

10 NA

11  
12  
13  
14  
15  
16  
17  
18  
19  
20  
21  
22  
23  
24  
25  
26  
27  
28  
29  
30  
31  
32  
33  
34  
35  
36  
37  
38  
39  
40  
41  
42  
43  
44  
45  
46  
47  
48  
49  
50  
51  
52  
53  
54  
55  
56  
57  
58  
59  
60

For peer review only

1  
2  
3  
4  
5  
6  
7  
8  
9  
10  
11  
12  
13  
14  
15  
16  
17  
18  
19  
20  
21  
22  
23  
24  
25  
26  
27  
28  
29  
30  
31  
32  
33  
34  
35  
36  
37  
38  
39  
40  
41  
42  
43  
44  
45  
46  
47  
48  
49  
50  
51  
52  
53  
54  
55  
56  
57  
58  
59  
60

| Type of intervention (sub-type) | Authors       | Paper Title                | Publication year | Country      |
|---------------------------------|---------------|----------------------------|------------------|--------------|
| VMMC                            | Jayeoba et al | Acceptability of male cir  | 2012             | Botswana     |
| VMMC                            | Kibel et al   | Acceptability of a Pilot I | 2018             | Kenya        |
| VMMC                            | Mavhu et al   | Is the PrePex device an    | 2019             | Zimbabwe     |
| VMMC                            | Peltzer et al | Prevalence and Accepta     | 2014             | South Africa |

For peer review only

| Setting       | Sample size | Sample age range | Sample gender | Key objective of intervention | SDGs |
|---------------|-------------|------------------|---------------|-------------------------------|------|
| Not stated    | 269         | 13-18            | Male          | To prevent new HIV infe 3     |      |
| Not stated    | 116         | 12-24            | Male          | To prevent new HIV infe 3     |      |
| Not stated    | 618         | 13-17            | Male          | To prevent new HIV infe 3     |      |
| Urban & Rural | 1489        | 15-24            | Female & /    | To prevent new HIV infe 3     |      |

For peer review only

| Prospective, concurrent or retrospective acceptability | Explicit definition of acceptability | Conceptual framework used for acceptability | Study design  | Methods used       |
|--------------------------------------------------------|--------------------------------------|---------------------------------------------|---------------|--------------------|
| Prospective & Retr                                     | NA                                   | NA                                          | Quantitative  | Structured questic |
| Retrospective                                          | Perception among st                  | NA                                          | Mixed methods | FGDs and survey (c |
| Retrospective                                          | NA                                   | NA                                          | Quantitative  | Survey (Questionn  |
| Prospective                                            | NA                                   | NA                                          | Quantitative  | Survey (Questionn  |

For peer review only



| Indicators and questions used | Overall acceptability | % adolescents that found the intervention acceptable (if reported) | Other stakeholders for which acceptability was assessed |
|-------------------------------|-----------------------|--------------------------------------------------------------------|---------------------------------------------------------|
| Structured questionnaire      | High                  | 75                                                                 | Parents/guardians                                       |
| The questionnaire             | High                  | 81-99                                                              | NA                                                      |
| Questionnaire iter            | High                  | 95-97                                                              | NA                                                      |
| Men and women v               | High                  | 46-61                                                              | NA                                                      |

For peer review only

1  
2  
3  
4  
5  
6  
7  
8  
9  
10  
11  
12  
13  
14  
15  
16  
17  
18  
19  
20  
21  
22  
23  
24  
25  
26  
27  
28  
29  
30  
31  
32  
33  
34  
35  
36  
37  
38  
39  
40  
41  
42  
43  
44  
45  
46  
47  
48  
49  
50  
51  
52  
53  
54  
55  
56  
57  
58  
59  
60

| Type of intervention (sub-type) | Authors        | Paper Title   | Publication year | Country      | Setting     | Sample size |
|---------------------------------|----------------|---------------|------------------|--------------|-------------|-------------|
| PrEP                            | Atujuna et al  | Contexts of v | 2018             | South Africa | Peri-urban  | 14          |
| PrEP                            | Giovenco et al | “The time ha  | 2018             | South Africa | Urban towns | 57          |

For peer review only

| Sample age range | Sample gender             | Key objective of intervention | SDGs        | Prospective, concurrent or retrospective acceptability | Explicit definition of acceptability |
|------------------|---------------------------|-------------------------------|-------------|--------------------------------------------------------|--------------------------------------|
| 15-17            | Female & MaTo prevent new | 3                             | Prospective | NA                                                     |                                      |
| 16-17            | Female & MaTo prevent new | 3                             | Prospective | NA                                                     |                                      |

For peer review only

1  
2  
3  
4  
5  
6  
7  
8  
9  
10  
11  
12  
13  
14  
15  
16  
17  
18  
19  
20  
21  
22  
23  
24  
25  
26  
27  
28  
29  
30  
31  
32  
33  
34  
35  
36  
37  
38  
39  
40  
41  
42  
43  
44  
45  
46  
47  
48  
49  
50  
51  
52  
53  
54  
55  
56  
57  
58  
59  
60

| Conceptual framework used for acceptability | Study design | Methods used  | Indicators and questions used | Overall acceptability | % adolescents that found the intervention acceptable (if ...) |
|---------------------------------------------|--------------|---------------|-------------------------------|-----------------------|---------------------------------------------------------------|
| NA                                          | Qualitative  | IDIs and FGDs | FGDs and IDI                  | High                  | NA                                                            |
| NA                                          | Mixed metho  | Survey (Ques  | Survey quest                  | High                  | 84-90                                                         |

For peer review only

1  
2  
3 **Other stakeholders**  
4 **for which**  
5 **acceptability was**  
6 **assessed**  
7

8  
9 Healthcare workers

10 Clinical service providers  
11  
12  
13  
14  
15  
16  
17  
18  
19  
20  
21  
22  
23  
24  
25  
26  
27  
28  
29  
30  
31  
32  
33  
34  
35  
36  
37  
38  
39  
40  
41  
42  
43  
44  
45  
46  
47  
48  
49  
50  
51  
52  
53  
54  
55  
56  
57  
58  
59  
60

For peer review only

1  
2  
3  
4  
5  
6  
7  
8  
9  
10  
11  
12  
13  
14  
15  
16  
17  
18  
19  
20  
21  
22  
23  
24  
25  
26  
27  
28  
29  
30  
31  
32  
33  
34  
35  
36  
37  
38  
39  
40  
41  
42  
43  
44  
45  
46  
47  
48  
49  
50  
51  
52  
53  
54  
55  
56  
57  
58  
59  
60

| Type of intervention (sub-type) | Authors       | Paper Title | Publication year | Country      |
|---------------------------------|---------------|-------------|------------------|--------------|
| Rectal microbicide              | Atujuna et al | Contexts c  | 2018             | South Africa |
| Home based Care                 | Busza et al   | Meeting th  | 2014             | Tanzania     |
| Substance use preventic         | Carney et al  | Acceptabil  | 2020             | South Africa |
| Cervical cancer screenin        | Mburu et al   | Knowledgı   | 2019             | Kenya        |
| Nutrition/HIV                   | Niasse et al  | Adherenc€   | 2020             | Senegal      |

For peer review only

| Setting       | Sample size | Sample age range | Sample gender | Key objective of intervention                               | SDGs |
|---------------|-------------|------------------|---------------|-------------------------------------------------------------|------|
| Peri-urban    | 14          | 15-17            | Female & Male | To prevent new HIV infections                               | 3    |
| Rural & Urban | 14          | 15-19            | Female & Male | To increase adherence and retention                         | 3    |
| Not stated    | 30          | 13-17            | Female & Male | To reduce the prevalence of sexually transmitted infections | 3    |
| Not stated    | 180         | 12-18            | Females       | To prevent HPV infection                                    | 3    |
| Not stated    | 89          | 12-18            | Female & Male | To reduce malnutrition among children                       | 2&3  |

For peer review only

|    | <b>Prospective, concurrent or retrospective acceptability</b> | <b>Explicit definition of acceptability</b> | <b>Conceptual framework used for acceptability</b> | <b>Study design</b> | <b>Methods used</b>    |
|----|---------------------------------------------------------------|---------------------------------------------|----------------------------------------------------|---------------------|------------------------|
| 7  | Prospective                                                   | NA                                          | NA                                                 | Qualitative         | IDIs and FGDs          |
| 8  | Retrospective                                                 | NA                                          | NA                                                 | Qualitative         | IDIs                   |
| 9  | Retrospective                                                 | NA                                          | NA                                                 | Qualitative         | IDIs                   |
| 11 | Prospective                                                   | NA                                          | NA                                                 | Quantitative        | Survey (Questionnaire) |
| 12 | Concurrent                                                    | NA                                          | NA                                                 | Mixed methods       | FGDs and survey (s)    |

For peer review only



| Indicators and questions used | Overall acceptability | % adolescents that found the intervention acceptable (if | Other stakeholders for which acceptability |
|-------------------------------|-----------------------|----------------------------------------------------------|--------------------------------------------|
| FGDs and IDI interview        | High                  | NA                                                       | Healthcare workers                         |
| Topic guides included         | Low                   | NA                                                       | Primary caregivers and providers           |
| No questions stated           | High                  | NA                                                       | Caregivers                                 |
| Through the survey            | High                  | 63.6                                                     | NA                                         |
| The structured quest          | High                  | 79-87                                                    | Caregivers                                 |

For peer review only



## PRISMA 2020 Checklist

| Section and Topic             | Item # | Checklist item                                                                                                                                                                                                                                                                                       | Location where item is reported |
|-------------------------------|--------|------------------------------------------------------------------------------------------------------------------------------------------------------------------------------------------------------------------------------------------------------------------------------------------------------|---------------------------------|
| <b>TITLE</b>                  |        |                                                                                                                                                                                                                                                                                                      |                                 |
| Title                         | 1      | Identify the report as a systematic review.                                                                                                                                                                                                                                                          | Pg. 1                           |
| <b>ABSTRACT</b>               |        |                                                                                                                                                                                                                                                                                                      |                                 |
| Abstract                      | 2      | See the PRISMA 2020 for Abstracts checklist.                                                                                                                                                                                                                                                         | Pg. 2                           |
| <b>INTRODUCTION</b>           |        |                                                                                                                                                                                                                                                                                                      |                                 |
| Rationale                     | 3      | Describe the rationale for the review in the context of existing knowledge.                                                                                                                                                                                                                          | Pg. 5                           |
| Objectives                    | 4      | Provide an explicit statement of the objective(s) or question(s) the review addresses.                                                                                                                                                                                                               | Pg. 5                           |
| <b>METHODS</b>                |        |                                                                                                                                                                                                                                                                                                      |                                 |
| Eligibility criteria          | 5      | Specify the inclusion and exclusion criteria for the review and how studies were grouped for the syntheses.                                                                                                                                                                                          | Pg. 5,6                         |
| Information sources           | 6      | Specify all databases, registers, websites, organisations, reference lists and other sources searched or consulted to identify studies. Specify the date when each source was last searched or consulted.                                                                                            | Pg. 6                           |
| Search strategy               | 7      | Present the full search strategies for all databases, registers and websites, including any filters and limits used.                                                                                                                                                                                 | Table S1                        |
| Selection process             | 8      | Specify the methods used to decide whether a study met the inclusion criteria of the review, including how many reviewers screened each record and each report retrieved, whether they worked independently, and if applicable, details of automation tools used in the process.                     | Pg. 6                           |
| Data collection process       | 9      | Specify the methods used to collect data from reports, including how many reviewers collected data from each report, whether they worked independently, any processes for obtaining or confirming data from study investigators, and if applicable, details of automation tools used in the process. | Pg. 6                           |
| Data items                    | 10a    | List and define all outcomes for which data were sought. Specify whether all results that were compatible with each outcome domain in each study were sought (e.g. for all measures, time points, analyses), and if not, the methods used to decide which results to collect.                        | NA                              |
|                               | 10b    | List and define all other variables for which data were sought (e.g. participant and intervention characteristics, funding sources). Describe any assumptions made about any missing or unclear information.                                                                                         | NA                              |
| Study risk of bias assessment | 11     | Specify the methods used to assess risk of bias in the included studies, including details of the tool(s) used, how many reviewers assessed each study and whether they worked independently, and if applicable, details of automation tools used in the process.                                    | NA                              |
| Effect measures               | 12     | Specify for each outcome the effect measure(s) (e.g. risk ratio, mean difference) used in the synthesis or presentation of results.                                                                                                                                                                  | NA                              |
| Synthesis methods             | 13a    | Describe the processes used to decide which studies were eligible for each synthesis (e.g. tabulating the study intervention characteristics and comparing against the planned groups for each synthesis (item #5)).                                                                                 | Pg. 6                           |
|                               | 13b    | Describe any methods required to prepare the data for presentation or synthesis, such as handling of missing summary statistics, or data conversions.                                                                                                                                                | NA                              |
|                               | 13c    | Describe any methods used to tabulate or visually display results of individual studies and syntheses.                                                                                                                                                                                               | NA                              |
|                               | 13d    | Describe any methods used to synthesize results and provide a rationale for the choice(s). If meta-analysis was performed, describe the model(s), method(s) to identify the presence and extent of statistical heterogeneity, and software package(s) used.                                          | NA                              |
|                               | 13e    | Describe any methods used to explore possible causes of heterogeneity among study results (e.g. subgroup analysis, meta-regression).                                                                                                                                                                 | NA                              |
|                               | 13f    | Describe any sensitivity analyses conducted to assess robustness of the synthesized results.                                                                                                                                                                                                         | NA                              |
| Reporting bias assessment     | 14     | Describe any methods used to assess risk of bias due to missing results in a synthesis (arising from reporting biases).                                                                                                                                                                              | NA                              |
| Certainty                     | 15     | Describe any methods used to assess certainty (or confidence) in the body of evidence for an outcome.                                                                                                                                                                                                | NA                              |

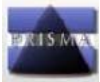

## PRISMA 2020 Checklist

| Section and Topic                              | Item # | Checklist item                                                                                                                                                                                                                                                                       | Location where item is reported |
|------------------------------------------------|--------|--------------------------------------------------------------------------------------------------------------------------------------------------------------------------------------------------------------------------------------------------------------------------------------|---------------------------------|
| assessment                                     |        |                                                                                                                                                                                                                                                                                      |                                 |
| <b>RESULTS</b>                                 |        |                                                                                                                                                                                                                                                                                      |                                 |
| Study selection                                | 16a    | Describe the results of the search and selection process, from the number of records identified in the search to the number of studies included in the review, ideally using a flow diagram.                                                                                         | Pg. 6                           |
|                                                | 16b    | Cite studies that might appear to meet the inclusion criteria, but which were excluded, and explain why they were excluded.                                                                                                                                                          | NA                              |
| Study characteristics                          | 17     | Cite each included study and present its characteristics.                                                                                                                                                                                                                            | Pg. 7                           |
| Risk of bias in studies                        | 18     | Present assessments of risk of bias for each included study.                                                                                                                                                                                                                         | NA                              |
| Results of individual studies                  | 19     | For all outcomes, present, for each study: (a) summary statistics for each group (where appropriate) and (b) an effect estimate and its precision (e.g. confidence/credible interval), ideally using structured tables or plots.                                                     | NA                              |
| Results of syntheses                           | 20a    | For each synthesis, briefly summarise the characteristics and risk of bias among contributing studies.                                                                                                                                                                               | NA                              |
|                                                | 20b    | Present results of all statistical syntheses conducted. If meta-analysis was done, present for each the summary estimate and its precision (e.g. confidence/credible interval) and measures of statistical heterogeneity. If comparing groups, describe the direction of the effect. | NA                              |
|                                                | 20c    | Present results of all investigations of possible causes of heterogeneity among study results.                                                                                                                                                                                       | NA                              |
|                                                | 20d    | Present results of all sensitivity analyses conducted to assess the robustness of the synthesized results.                                                                                                                                                                           | NA                              |
| Reporting biases                               | 21     | Present assessments of risk of bias due to missing results (arising from reporting biases) for each synthesis assessed.                                                                                                                                                              | NA                              |
| Certainty of evidence                          | 22     | Present assessments of certainty (or confidence) in the body of evidence for each outcome assessed.                                                                                                                                                                                  | NA                              |
| <b>DISCUSSION</b>                              |        |                                                                                                                                                                                                                                                                                      |                                 |
| Discussion                                     | 23a    | Provide a general interpretation of the results in the context of other evidence.                                                                                                                                                                                                    | Pg. 11                          |
|                                                | 23b    | Discuss any limitations of the evidence included in the review.                                                                                                                                                                                                                      | Pg. 13                          |
|                                                | 23c    | Discuss any limitations of the review processes used.                                                                                                                                                                                                                                | Pg. 13                          |
|                                                | 23d    | Discuss implications of the results for practice, policy, and future research.                                                                                                                                                                                                       | Pg. 13-14                       |
| <b>OTHER INFORMATION</b>                       |        |                                                                                                                                                                                                                                                                                      |                                 |
| Support                                        | 25     | Describe sources of financial or non-financial support for the review, and the role of the funders or sponsors in the review.                                                                                                                                                        | Pg. 15                          |
| Competing interests                            | 26     | Declare any competing interests of review authors.                                                                                                                                                                                                                                   | Pg. 15                          |
| Availability of data, code and other materials | 27     | Report which of the following are publicly available and where they can be found: template data collection forms; data extracted from included studies; data used for all analyses; analytic code; any other materials used in the review.                                           | NA                              |
