# Supplementary material for: Decade of research into the acceptability of interventions aimed at improving adolescent and youth health and social outcomes in Africa: a systematic review and evidence map
Source: PubMed Central journal article supplement — BMJ Open. 2021 Dec 20;11(12):e055160. doi: 10.1136/bmjopen-2021-055160 (PMC8689197; doi:10.1136/bmjopen-2021-055160), 2021-12-20
Supplement: bmjopen-2021-055160supp001.pdf [file bmjopen-2021-055160supp001.pdf]

**Table S1. Systematic Review Search Strategy**

|                                                                       |                                                                                                                                                                                                                                                                                                                                                                                                                                                                                                                                                                                                                                                                                                                                                                                                                                                                                                                                                                                                                                                                                                                                                                                                                                                                                                                                                                                                                                                                                                                                                                                                                                                                              |
|-----------------------------------------------------------------------|------------------------------------------------------------------------------------------------------------------------------------------------------------------------------------------------------------------------------------------------------------------------------------------------------------------------------------------------------------------------------------------------------------------------------------------------------------------------------------------------------------------------------------------------------------------------------------------------------------------------------------------------------------------------------------------------------------------------------------------------------------------------------------------------------------------------------------------------------------------------------------------------------------------------------------------------------------------------------------------------------------------------------------------------------------------------------------------------------------------------------------------------------------------------------------------------------------------------------------------------------------------------------------------------------------------------------------------------------------------------------------------------------------------------------------------------------------------------------------------------------------------------------------------------------------------------------------------------------------------------------------------------------------------------------|
| Search criteria (based on the Cochrane Collaboration's PICO criteria) | <p><b>Population:</b> adolescents or youth 10–24 years, living in Africa</p> <p><b>Intervention:</b> primary research to determine adolescent and youth acceptability of one or more interventions aimed at improving their developmental outcomes (as per SDG indicators)</p> <p><b>Comparison:</b> N/A</p> <p><b>Outcomes:</b> adolescent acceptability findings, including: proportion of adolescents that find an intervention acceptable; information on what adolescents consider acceptable or not; reasons given for acceptability or lack of acceptability</p> <p><b>Study or intervention design:</b> all types of study designs; no limiters on methodology</p>                                                                                                                                                                                                                                                                                                                                                                                                                                                                                                                                                                                                                                                                                                                                                                                                                                                                                                                                                                                                   |
| Example search term: search term used for EBSCOhost-linked databases  | <p>Adolescents or Youth: AB ( youth OR “young person” OR “young people” OR “young women” OR “young men” OR “child*” OR “adoles*” OR “young adult” OR “teen*” )</p> <p>AND Acceptability: AB ( acceptable OR acceptability OR co-creat* OR “adolescent engagement” OR “youth engagement” OR “teen* engagement” OR “participant engagement” OR “adolescent participation” OR “youth participation” OR “teen* participation” OR “participant input” OR “adolescent input” OR “youth input” OR “teen* input” OR “participant feedback” OR “adolescent feedback” OR “youth feedback” OR “teen* feedback” OR “participant consultation” OR “adolescent consultation” OR “youth consultation” OR “teen* consultation” OR “participant advisory” OR “adolescent advisory” OR “youth advisory” OR “teen* advisory” OR “participatory research” )</p> <p>AND Africa: AB (Africa* OR Algeria OR Angola OR Benin OR Botswana OR “Burkina Faso” OR Burundi OR Cameroon OR “Canary Islands” OR “Cape Verde” OR “Central African Republic” OR Chad OR Comoros OR Congo OR “Democratic Republic of Congo” OR Djibouti OR Egypt OR “Equatorial Guinea” OR Eritrea OR Ethiopia OR Gabon OR Gambia OR Ghana OR Guinea OR “Guinea Bissau” OR “Ivory Coast” OR “Cote d’Ivoire” OR Jamahiriya OR Jamahirya OR Kenya OR Lesotho OR Liberia OR Libya OR Libia OR Madagascar OR Malawi OR Mali OR Mauritania OR Mauritius OR Mayote OR Morocco OR Mozambique OR Mocambique OR Namibia OR Niger OR Nigeria OR Principe OR Reunion OR Rwanda OR “Sao Tome” OR Senegal OR Seychelles OR “Sierra Leone” OR Somalia OR “St Helena” OR Sudan OR Swaziland OR Eswatini OR Tanzania OR Togo OR Tunisia OR</p> |

|                    |                                                                                                                                                        |
|--------------------|--------------------------------------------------------------------------------------------------------------------------------------------------------|
|                    | Uganda OR “Western Sahara” OR Zaire OR Zambia OR Zimbabwe)<br>NOT (“guinea pig” OR “guinea pigs” OR “aspergillus niger” OR<br>“African American”)      |
| Databases searched | Web of Science, Medline, PsychInfo, SociIndex, CINAHL, Africa-wide,<br>Academic Search Complete and PubMed                                             |
| Limiters           | <ul style="list-style-type: none"><li>- Published between 1 January 2010 and 30 June 2020</li><li>- Peer-reviewed</li><li>- English language</li></ul> |
