# Supplementary figures and images for: Decade of research into the acceptability of interventions aimed at improving adolescent and youth health and social outcomes in Africa: a systematic review and evidence map
Source: PubMed Central journal article supplement — BMJ Open. 2021 Dec 20;11(12):e055160. doi: 10.1136/bmjopen-2021-055160 (PMC8689197; doi:10.1136/bmjopen-2021-055160), 2021-12-20

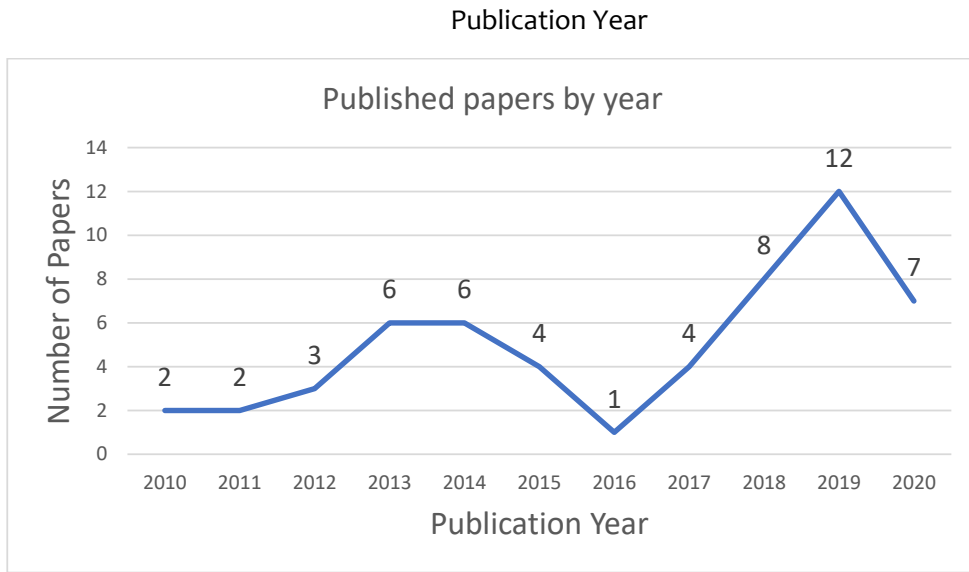

Supplement: bmjopen-2021-055160supp003.pdf [file bmjopen-2021-055160supp003.pdf]
